# Supplementary material for: High Expression of JMJD4 Is a Potential Diagnostic and Prognostic Marker of Renal Cell Carcinoma
Source: Dis Markers. 2021 Dec 24;2021:9573540. doi: 10.1155/2021/9573540 (PMC8720244; doi:10.1155/2021/9573540)
Supplement: Supplementary 1 — Supplemental material 1: details of the enriched genes in KEGG analysis. [file 9573540.f1.xlsx]

## Sheet: out.path
KEGG_A_class	KEGG_B_class	Pathway	out (155)	All (8312)	Pvalue	Qvalue	Pathway ID	Genes	K_IDs
Organismal Systems	Excretory system	Collecting duct acid secretion	6	27	8.17173e-06	0.00183047	ko04966	ENSG00000116039;ENSG00000105929;ENSG00000147614;ENSG00000151418;ENSG00000004939;ENSG00000184908	K02147+K02154+K02146+K02152+K06573+K05018
Environmental Information Processing	Signaling molecules and interaction	Neuroactive ligand-receptor interaction	18	352	9.15783e-05	0.00580955	ko04080	ENSG00000183971;ENSG00000186297;ENSG00000102239;ENSG00000169006;ENSG00000138039;ENSG00000043591;ENSG00000128310;ENSG00000152208;ENSG00000152822;ENSG00000147571;ENSG00000166148;ENSG00000136487;ENSG00000159224;ENSG00000166863;ENSG00000110680;ENSG00000161610;ENSG00000113889;ENSG00000215644	K23141+K05175+K04170+K04212+K04248+K04141+K04232+K05207+K04603+K05256+K04226+K05438+K05258+K05240+K12332+K05246+K03898+K04583
Organismal Systems	Digestive system	Fat digestion and absorption	6	41	0.000100062	0.00580955	ko04975	ENSG00000100078;ENSG00000137392;ENSG00000204140;ENSG00000084674;ENSG00000166391;ENSG00000143921	K01047+K14460+K14460+K14462+K14457+K05684
Organismal Systems	Nervous system	Synaptic vesicle cycle	8	79	0.000103742	0.00580955	ko04721	ENSG00000148408;ENSG00000116039;ENSG00000105929;ENSG00000147614;ENSG00000103546;ENSG00000137766;ENSG00000151418;ENSG00000105143	K04849+K02147+K02154+K02146+K05035+K15293+K02152+K05617
Human Diseases	Infectious diseases	Vibrio cholerae infection	6	51	0.000343765	0.0154007	ko05110	ENSG00000197943;ENSG00000116039;ENSG00000001626;ENSG00000105929;ENSG00000147614;ENSG00000151418	K05859+K02147+K05031+K02154+K02146+K02152
Organismal Systems	Sensory system	Taste transduction	7	81	0.000749942	0.0279978	ko04742	ENSG00000186297;ENSG00000166828;ENSG00000154678;ENSG00000152822;ENSG00000111319;ENSG00000149305;ENSG00000186038	K05175+K04827+K13755+K04603+K04824+K04819+K04819
Metabolism	Metabolism of cofactors and vitamins	Retinol metabolism	6	68	0.00161108	0.0515547	ko00830	ENSG00000140505;ENSG00000248144;ENSG00000080511;ENSG00000198099;ENSG00000242515;ENSG00000242366	K07409+K13951+K11150+K13980+K00699+K00699
Metabolism	Xenobiotics biodegradation and metabolism	Drug metabolism - cytochrome P450	6	70	0.00187199	0.0524156	ko00982	ENSG00000140505;ENSG00000248144;ENSG00000198099;ENSG00000242515;ENSG00000132746;ENSG00000242366	K07409+K13951+K13980+K00699+K00129+K00699
Metabolism	Xenobiotics biodegradation and metabolism	Metabolism of xenobiotics by cytochrome P450	6	75	0.00266409	0.0663063	ko00980	ENSG00000140505;ENSG00000248144;ENSG00000198099;ENSG00000242515;ENSG00000132746;ENSG00000242366	K07409+K13951+K13980+K00699+K00129+K00699
Organismal Systems	Endocrine system	Estrogen signaling pathway	8	141	0.0047687	0.106819	ko04915	ENSG00000160182;ENSG00000171346;ENSG00000186847;ENSG00000186832;ENSG00000178372;ENSG00000152822;ENSG00000204897;ENSG00000131737	K22456+K07604+K07604+K07604+K02183+K04603+K07604+K07604
Human Diseases	Cancers	Chemical carcinogenesis	6	86	0.00526318	0.107178	ko05204	ENSG00000140505;ENSG00000248144;ENSG00000198099;ENSG00000242515;ENSG00000132746;ENSG00000242366	K07409+K13951+K13980+K00699+K00129+K00699
Environmental Information Processing	Signal transduction	cAMP signaling pathway	10	223	0.00875567	0.163439	ko04024	ENSG00000099822;ENSG00000138039;ENSG00000043591;ENSG00000001626;ENSG00000178372;ENSG00000129991;ENSG00000159224;ENSG00000170289;ENSG00000196917;ENSG00000070729	K04955+K04248+K04141+K05031+K02183+K12044+K05258+K04953+K08401+K04952
Human Diseases	Infectious diseases	Epithelial cell signaling in Helicobacter pylori infection	5	70	0.00966758	0.16658	ko05120	ENSG00000197943;ENSG00000116039;ENSG00000105929;ENSG00000147614;ENSG00000151418	K05859+K02147+K02154+K02146+K02152
Metabolism	Lipid metabolism	Linoleic acid metabolism	3	30	0.0178623	0.285796	ko00591	ENSG00000100078;ENSG00000168907;ENSG00000140505	K01047+K16342+K07409
Organismal Systems	Immune system	Complement and coagulation cascades	5	91	0.0272754	0.39399	ko04610	ENSG00000171557;ENSG00000171560;ENSG00000123843;ENSG00000171564;ENSG00000113889	K03905+K03903+K04003+K03904+K03898
Organismal Systems	Nervous system	Long-term depression	4	62	0.0281421	0.39399	ko04730	ENSG00000168907;ENSG00000152208;ENSG00000152822;ENSG00000147571	K16342+K05207+K04603+K05256
Environmental Information Processing	Signal transduction	Calcium signaling pathway	10	273	0.0313662	0.40739	ko04020	ENSG00000281179;ENSG00000154678;ENSG00000138039;ENSG00000197943;ENSG00000043591;ENSG00000148408;ENSG00000178372;ENSG00000152822;ENSG00000178568;ENSG00000166148	K06856+K13755+K04248+K05859+K04141+K04849+K02183+K04603+K05085+K04226
Metabolism	Lipid metabolism	Steroid hormone biosynthesis	4	65	0.0327367	0.40739	ko00140	ENSG00000140505;ENSG00000140459;ENSG00000242515;ENSG00000242366	K07409+K00498+K00699+K00699
Metabolism	Amino acid metabolism	Tyrosine metabolism	3	39	0.0356284	0.410622	ko00350	ENSG00000248144;ENSG00000198099;ENSG00000132746	K13951+K13980+K00129
Human Diseases	Neurodegenerative disease	Spinocerebellar ataxia	5	100	0.0387197	0.410622	ko05017	ENSG00000152822;ENSG00000129152;ENSG00000105143;ENSG00000173898;ENSG00000196289	K04603+K09064+K05617+K23932+K08334
Organismal Systems	Circulatory system	Vascular smooth muscle contraction	6	135	0.0402574	0.410622	ko04270	ENSG00000100078;ENSG00000168907;ENSG00000178372;ENSG00000166148;ENSG00000110680;ENSG00000163273	K01047+K16342+K02183+K04226+K12332+K12336
Human Diseases	Infectious diseases	Staphylococcus aureus infection	7	173	0.0428234	0.410622	ko05150	ENSG00000281179;ENSG00000171346;ENSG00000186847;ENSG00000186832;ENSG00000171557;ENSG00000204897;ENSG00000131737	K06856+K07604+K07604+K07604+K03905+K07604+K07604
Metabolism	Glycan biosynthesis and metabolism	Glycosphingolipid biosynthesis - ganglio series	2	18	0.0434838	0.410622	ko00604	ENSG00000101638;ENSG00000135454	K03369+K00725
Environmental Information Processing	Signal transduction	Ras signaling pathway	9	250	0.0439952	0.410622	ko04014	ENSG00000102678;ENSG00000167244;ENSG00000100078;ENSG00000168907;ENSG00000101349;ENSG00000162344;ENSG00000197943;ENSG00000178372;ENSG00000157404	K04358+K13769+K01047+K16342+K05736+K22603+K05859+K02183+K05091
Organismal Systems	Endocrine system	Renin secretion	4	73	0.0470197	0.421296	ko04924	ENSG00000154678;ENSG00000043591;ENSG00000178372;ENSG00000143839	K13755+K04141+K02183+K01380
Organismal Systems	Digestive system	Bile secretion	4	74	0.0490134	0.42227	ko04976	ENSG00000131910;ENSG00000001626;ENSG00000188687;ENSG00000143921	K08563+K05031+K13857+K05684
Organismal Systems	Digestive system	Gastric acid secretion	4	77	0.0552711	0.458546	ko04971	ENSG00000147606;ENSG00000001626;ENSG00000178372;ENSG00000180251	K13962+K05031+K02183+K13961
Human Diseases	Substance dependence	Alcoholism	7	195	0.0720599	0.544991	ko05034	ENSG00000178372;ENSG00000147571;ENSG00000276410;ENSG00000275126;ENSG00000197153;ENSG00000274618;ENSG00000184270	K02183+K05256+K11252+K11254+K11253+K11254+K11251
Metabolism	Amino acid metabolism	Arginine and proline metabolism	3	52	0.0724869	0.544991	ko00330	ENSG00000131730;ENSG00000237289;ENSG00000223572	K00933+K00933+K00933
Organismal Systems	Endocrine system	Renin-angiotensin system	2	24	0.0729899	0.544991	ko04614	ENSG00000167748;ENSG00000143839	K01325+K01380
Organismal Systems	Endocrine system	Ovarian Steroidogenesis	3	55	0.0827134	0.562565	ko04913	ENSG00000168907;ENSG00000138039;ENSG00000140459	K16342+K04248+K00498
Metabolism	Lipid metabolism	alpha-Linolenic acid metabolism	2	26	0.0839221	0.562565	ko00592	ENSG00000100078;ENSG00000168907	K01047+K16342
Metabolism	Biosynthesis of other secondary metabolites	Caffeine metabolism	1	5	0.0898464	0.562565	ko00232	ENSG00000140505	K07409
Metabolism	Carbohydrate metabolism	Ascorbate and aldarate metabolism	2	28	0.0953142	0.562565	ko00053	ENSG00000242515;ENSG00000242366	K00699+K00699
Organismal Systems	Sensory system	Phototransduction	2	28	0.0953142	0.562565	ko04744	ENSG00000178372;ENSG00000070729	K02183+K04952
Cellular Processes	Cellular community - eukaryotes	Gap junction	4	93	0.0954338	0.562565	ko04540	ENSG00000159248;ENSG00000043591;ENSG00000152822;ENSG00000152086	K07373+K04141+K04603+K07374
Organismal Systems	Digestive system	Salivary secretion	4	93	0.0954338	0.562565	ko04970	ENSG00000251655;ENSG00000043591;ENSG00000178372;ENSG00000167419	K13911+K04141+K02183+K12550
Organismal Systems	Immune system	Platelet activation	5	130	0.0954352	0.562565	ko04611	ENSG00000168907;ENSG00000197943;ENSG00000171557;ENSG00000171560;ENSG00000171564	K16342+K05859+K03905+K03903+K03904
Environmental Information Processing	Signal transduction	MAPK signaling pathway	9	304	0.114515	0.657728	ko04010	ENSG00000102678;ENSG00000167244;ENSG00000168907;ENSG00000162344;ENSG00000148408;ENSG00000075461;ENSG00000178568;ENSG00000157404;ENSG00000130433	K04358+K13769+K16342+K22603+K04849+K04869+K05085+K05091+K04871
Environmental Information Processing	Signal transduction	Phosphatidylinositol signaling system	4	102	0.122688	0.687051	ko04070	ENSG00000185133;ENSG00000197943;ENSG00000178372;ENSG00000139144	K01106+K05859+K02183+K00923
Organismal Systems	Sensory system	Inflammatory mediator regulation of TRP channels	4	103	0.125903	0.687862	ko04750	ENSG00000168907;ENSG00000197943;ENSG00000178372;ENSG00000113889	K16342+K05859+K02183+K03898
Cellular Processes	Transport and catabolism	Phagosome	7	230	0.138087	0.719592	ko04145	ENSG00000158270;ENSG00000281179;ENSG00000116039;ENSG00000105929;ENSG00000147614;ENSG00000151418;ENSG00000152086	K10062+K06856+K02147+K02154+K02146+K02152+K07374
Metabolism	Carbohydrate metabolism	Pentose and glucuronate interconversions	2	35	0.138136	0.719592	ko00040	ENSG00000242515;ENSG00000242366	K00699+K00699
Metabolism	Carbohydrate metabolism	Glycolysis / Gluconeogenesis	3	71	0.146248	0.744537	ko00010	ENSG00000248144;ENSG00000198099;ENSG00000132746	K13951+K13980+K00129
Organismal Systems	Circulatory system	Adrenergic signaling in cardiomyocytes	5	152	0.154245	0.767796	ko04261	ENSG00000043591;ENSG00000178372;ENSG00000075461;ENSG00000129991;ENSG00000130433	K04141+K02183+K04869+K12044+K04871
Metabolism	Carbohydrate metabolism	Inositol phosphate metabolism	3	75	0.164092	0.793565	ko00562	ENSG00000185133;ENSG00000197943;ENSG00000139144	K01106+K05859+K00923
Organismal Systems	Nervous system	Serotonergic synapse	4	116	0.170731	0.793565	ko04726	ENSG00000168907;ENSG00000148408;ENSG00000149305;ENSG00000186038	K16342+K04849+K04819+K04819
Organismal Systems	Endocrine system	Oxytocin signaling pathway	5	159	0.175552	0.793565	ko04921	ENSG00000168907;ENSG00000260458;ENSG00000178372;ENSG00000075461;ENSG00000130433	K16342+K05005+K02183+K04869+K04871
Human Diseases	Substance dependence	Nicotine addiction	2	41	0.177496	0.793565	ko05033	ENSG00000186297;ENSG00000148408	K05175+K04849
Human Diseases	Infectious diseases	Pertussis	3	78	0.17788	0.793565	ko05133	ENSG00000178372;ENSG00000113302;ENSG00000123843	K02183+K05425+K04003
Human Diseases	Cardiovascular diseases	Arrhythmogenic right ventricular cardiomyopathy (ARVC)	3	79	0.182546	0.793565	ko05412	ENSG00000075461;ENSG00000130433;ENSG00000066032	K04869+K04871+K05691
Organismal Systems	Excretory system	Aldosterone-regulated sodium reabsorption	2	42	0.184221	0.793565	ko04960	ENSG00000166828;ENSG00000111319	K04827+K04824
Metabolism	Metabolism of cofactors and vitamins	Porphyrin and chlorophyll metabolism	2	44	0.197776	0.802793	ko00860	ENSG00000242515;ENSG00000242366	K00699+K00699
Human Diseases	Immune diseases	Rheumatoid arthritis	5	167	0.20119	0.802793	ko05323	ENSG00000281179;ENSG00000116039;ENSG00000105929;ENSG00000147614;ENSG00000151418	K06856+K02147+K02154+K02146+K02152
Organismal Systems	Aging	Longevity regulating pathway - worm	1	12	0.202311	0.802793	ko04212	ENSG00000189030	K03871
Human Diseases	Cardiovascular diseases	Dilated cardiomyopathy (DCM)	5	168	0.204483	0.802793	ko05414	ENSG00000281179;ENSG00000043591;ENSG00000075461;ENSG00000129991;ENSG00000130433	K06856+K04141+K04869+K12044+K04871
Organismal Systems	Sensory system	Olfactory transduction	11	444	0.205929	0.802793	ko04740	ENSG00000154678;ENSG00000178372;ENSG00000181609;ENSG00000183269;ENSG00000171505;ENSG00000171496;ENSG00000070729;ENSG00000197674;ENSG00000181616;ENSG00000180016;ENSG00000159961	K13755+K02183+K04257+K04257+K04257+K04257+K04952+K04257+K04257+K04257+K04257
Metabolism	Lipid metabolism	Fatty acid degradation	2	46	0.21145	0.802793	ko00071	ENSG00000248144;ENSG00000198099	K13951+K13980
Environmental Information Processing	Membrane transport	ABC transporters	2	46	0.21145	0.802793	ko02010	ENSG00000001626;ENSG00000143921	K05031+K05684
Human Diseases	Immune diseases	Systemic lupus erythematosus	6	217	0.218693	0.816455	ko05322	ENSG00000281179;ENSG00000276410;ENSG00000275126;ENSG00000197153;ENSG00000274618;ENSG00000184270	K06856+K11252+K11254+K11253+K11254+K11251
Environmental Information Processing	Signal transduction	ErbB signaling pathway	3	88	0.225862	0.823799	ko04012	ENSG00000101349;ENSG00000197943;ENSG00000178568	K05736+K05859+K05085
Environmental Information Processing	Signal transduction	cGMP - PKG signaling pathway	5	175	0.228016	0.823799	ko04022	ENSG00000043591;ENSG00000178372;ENSG00000070729;ENSG00000163273;ENSG00000113889	K04141+K02183+K04952+K12336+K03898
Metabolism	Lipid metabolism	Ether lipid metabolism	2	49	0.232122	0.825322	ko00565	ENSG00000100078;ENSG00000168907	K01047+K16342
Organismal Systems	Circulatory system	Cardiac muscle contraction	3	91	0.24073	0.841014	ko04260	ENSG00000075461;ENSG00000129991;ENSG00000130433	K04869+K12044+K04871
Metabolism	Metabolism of other amino acids	Taurine and hypotaurine metabolism	1	15	0.246177	0.841014	ko00430	ENSG00000167741	K00681
Human Diseases	Cardiovascular diseases	Hypertrophic cardiomyopathy (HCM)	3	93	0.250733	0.841014	ko05410	ENSG00000075461;ENSG00000129991;ENSG00000130433	K04869+K12044+K04871
Environmental Information Processing	Signal transduction	Phospholipase D signaling pathway	6	229	0.255508	0.841014	ko04072	ENSG00000281179;ENSG00000168907;ENSG00000197943;ENSG00000152822;ENSG00000157404;ENSG00000166148	K06856+K16342+K05859+K04603+K05091+K04226
Metabolism	Metabolism of cofactors and vitamins	Thiamine metabolism	1	16	0.260259	0.841014	ko00730	ENSG00000163283	K01077
Human Diseases	Substance dependence	Morphine addiction	3	96	0.26585	0.841014	ko05032	ENSG00000186297;ENSG00000154678;ENSG00000148408	K05175+K13755+K04849
Organismal Systems	Digestive system	Cholesterol metabolism	2	54	0.266806	0.841014	ko04979	ENSG00000084674;ENSG00000143921	K14462+K05684
Organismal Systems	Development	Axon guidance	5	187	0.270043	0.841014	ko04360	ENSG00000145147;ENSG00000101349;ENSG00000197943;ENSG00000138696;ENSG00000145242	K06839+K05736+K05859+K13578+K05106
Metabolism	Energy metabolism	Nitrogen metabolism	1	17	0.27408	0.841014	ko00910	ENSG00000133742	K01672
Organismal Systems	Development and regeneration	Axon regeneration	1	17	0.27408	0.841014	ko04361	ENSG00000124664	K09442
Metabolism	Energy metabolism	Oxidative phosphorylation	4	145	0.285523	0.859099	ko00190	ENSG00000116039;ENSG00000105929;ENSG00000147614;ENSG00000151418	K02147+K02154+K02146+K02152
Metabolism	Amino acid metabolism	Phenylalanine metabolism	1	18	0.287645	0.859099	ko00360	ENSG00000132746	K00129
Human Diseases	Infectious diseases	Legionellosis	2	58	0.29457	0.862195	ko05134	ENSG00000101210;ENSG00000113302	K03231+K05425
Organismal Systems	Endocrine system	Melanogenesis	3	102	0.29638	0.862195	ko04916	ENSG00000178372;ENSG00000101440;ENSG00000157404	K02183+K08725+K05091
Human Diseases	Cancers	Gastric cancer	4	153	0.319226	0.898885	ko05226	ENSG00000102678;ENSG00000165556;ENSG00000162344;ENSG00000066032	K04358+K22234+K22603+K05691
Metabolism	Glycan biosynthesis and metabolism	Other glycan degradation	1	21	0.326846	0.898885	ko00511	ENSG00000204099	K12357
Organismal Systems	Immune system	C-type lectin receptor signaling pathway	3	108	0.327117	0.898885	ko04625	ENSG00000197943;ENSG00000178372;ENSG00000113302	K05859+K02183+K05425
Human Diseases	Infectious diseases	African trypanosomiasis	3	108	0.327117	0.898885	ko05143	ENSG00000281179;ENSG00000113302;ENSG00000113889	K06856+K05425+K03898
Environmental Information Processing	Signal transduction	VEGF signaling pathway	2	63	0.329056	0.898885	ko04370	ENSG00000168907;ENSG00000197943	K16342+K05859
Organismal Systems	Endocrine system	GnRH secretion	2	67	0.356322	0.961639	ko04929	ENSG00000099822;ENSG00000105642	K04955+K04942
Metabolism	Amino acid metabolism	Histidine metabolism	1	24	0.363903	0.969416	ko00340	ENSG00000132746	K00129
Organismal Systems	Nervous system	Long-term potentiation	2	69	0.369811	0.969416	ko04720	ENSG00000178372;ENSG00000152822	K02183+K04603
Organismal Systems	Digestive system	Vitamin digestion and absorption	1	25	0.375799	0.969416	ko04977	ENSG00000084674	K14462
Metabolism	Lipid metabolism	Arachidonic acid metabolism	2	70	0.376514	0.969416	ko00590	ENSG00000100078;ENSG00000168907	K01047+K16342
Organismal Systems	Nervous system	Glutamatergic synapse	3	119	0.383333	0.975214	ko04724	ENSG00000168907;ENSG00000152822;ENSG00000105143	K16342+K04603+K05617
Metabolism	Glycan biosynthesis and metabolism	Glycosaminoglycan biosynthesis - heparan sulfate / heparin	1	26	0.387474	0.975214	ko00534	ENSG00000185352	K08103
Environmental Information Processing	Signal transduction	HIF-1 signaling pathway	3	121	0.393467	0.979297	ko04066	ENSG00000197943;ENSG00000175766;ENSG00000189030	K05859+K03259+K03871
Human Diseases	Cancers	Renal cell carcinoma	2	75	0.409571	0.985806	ko05211	ENSG00000101349;ENSG00000189030	K05736+K03871
Metabolism	Metabolism of cofactors and vitamins	Folate biosynthesis	1	28	0.410177	0.985806	ko00790	ENSG00000163283	K01077
Human Diseases	Cancers	Melanoma	2	76	0.416082	0.985806	ko05218	ENSG00000102678;ENSG00000162344	K04358+K22603
Human Diseases	Endocrine and metabolic diseases	Maturity onset diabetes of the young	1	29	0.421213	0.985806	ko04950	ENSG00000163623	K08030
Human Diseases	Infectious diseases	Bacterial invasion of epithelial cells	2	77	0.422558	0.985806	ko05100	ENSG00000140623;ENSG00000066032	K16938+K05691
Human Diseases	Cancers	Glioma	2	79	0.435398	0.985806	ko05214	ENSG00000197943;ENSG00000178372	K05859+K02183
Metabolism	Xenobiotics biodegradation and metabolism	Drug metabolism - other enzymes	2	80	0.441761	0.985806	ko00983	ENSG00000242515;ENSG00000242366	K00699+K00699
Metabolism	Metabolism of other amino acids	beta-Alanine metabolism	1	32	0.453105	0.985806	ko00410	ENSG00000132746	K00129
Metabolism	Glycan biosynthesis and metabolism	Mucin type O-glycan biosynthesis	1	32	0.453105	0.985806	ko00512	ENSG00000185274	K00710
Human Diseases	Cancers	Pathways in cancer	11	552	0.455139	0.985806	ko05200	ENSG00000102678;ENSG00000167244;ENSG00000162344;ENSG00000197943;ENSG00000178372;ENSG00000113302;ENSG00000142515;ENSG00000157404;ENSG00000189030;ENSG00000113889;ENSG00000066032	K04358+K13769+K22603+K05859+K02183+K05425+K01351+K05091+K03871+K03898+K05691
Cellular Processes	Cell growth and death	Apoptosis - multiple species	1	33	0.463343	0.985806	ko04215	ENSG00000196289	K08334
Human Diseases	Drug resistance	EGFR tyrosine kinase inhibitor resistance	2	85	0.472973	0.985806	ko01521	ENSG00000197943;ENSG00000175766	K05859+K03259
Cellular Processes	Transport and catabolism	Autophagy - other eukaryotes	1	34	0.47339	0.985806	ko04136	ENSG00000196289	K08334
Cellular Processes	Transport and catabolism	Lysosome	3	139	0.482198	0.985806	ko04142	ENSG00000178597;ENSG00000105929;ENSG00000147614	K12382+K02154+K02146
Organismal Systems	Immune system	Fc epsilon RI signaling pathway	3	141	0.491701	0.985806	ko04664	ENSG00000281179;ENSG00000168907;ENSG00000197943	K06856+K16342+K05859
Human Diseases	Cardiovascular diseases	Fluid shear stress and atherosclerosis	3	142	0.496421	0.985806	ko05418	ENSG00000178372;ENSG00000138696;ENSG00000163273	K02183+K13578+K12336
Organismal Systems	Endocrine system	Insulin secretion	2	91	0.509018	0.985806	ko04911	ENSG00000159224;ENSG00000105642	K05258+K04942
Organismal Systems	Endocrine system	Insulin signaling pathway	3	145	0.510448	0.985806	ko04910	ENSG00000185133;ENSG00000178372;ENSG00000175766	K01106+K02183+K03259
Metabolism	Metabolism of cofactors and vitamins	Nicotinate and nicotinamide metabolism	1	38	0.511745	0.985806	ko00760	ENSG00000077009	K10524
Organismal Systems	Nervous system	GABAergic synapse	2	92	0.514869	0.985806	ko04727	ENSG00000186297;ENSG00000148408	K05175+K04849
Human Diseases	Infectious diseases	Tuberculosis	5	257	0.525968	0.985806	ko05152	ENSG00000281179;ENSG00000105929;ENSG00000178372;ENSG00000147614;ENSG00000113302	K06856+K02154+K02183+K02146+K05425
Organismal Systems	Endocrine system	GnRH signaling pathway	2	94	0.526433	0.985806	ko04912	ENSG00000168907;ENSG00000178372	K16342+K02183
Human Diseases	Infectious diseases	Leishmaniasis	3	149	0.528832	0.985806	ko05140	ENSG00000281179;ENSG00000101210;ENSG00000113302	K06856+K03231+K05425
Metabolism	Global and overview maps	Metabolic pathways	29	1554	0.531342	0.985806	ko01100	ENSG00000185133;ENSG00000100078;ENSG00000077009;ENSG00000101638;ENSG00000168907;ENSG00000154678;ENSG00000197943;ENSG00000131730;ENSG00000140505;ENSG00000140459;ENSG00000116039;ENSG00000185274;ENSG00000248144;ENSG00000105929;ENSG00000147614;ENSG00000237289;ENSG00000223572;ENSG00000133742;ENSG00000135454;ENSG00000080511;ENSG00000139144;ENSG00000198099;ENSG00000242515;ENSG00000163283;ENSG00000167741…	K01106+K01047+K10524+K03369+K16342+K13755+K05859+K00933+K07409+K00498+K02147+K00710+K13951+K02154+K02146+K00933+K00933+K01672+K00725+K11150+K00923+K13980+K00699+K01077+K00681+K02152+K00129+K12357+K00699
Human Diseases	Cancers	Viral carcinogenesis	4	209	0.550185	0.985806	ko05203	ENSG00000147614;ENSG00000276410;ENSG00000275126;ENSG00000274618	K02146+K11252+K11254+K11254
Organismal Systems	Endocrine system	Aldosterone synthesis and secretion	2	99	0.554527	0.985806	ko04925	ENSG00000140459;ENSG00000178372	K00498+K02183
Organismal Systems	Nervous system	Retrograde endocannabinoid signaling	3	155	0.555682	0.985806	ko04723	ENSG00000186297;ENSG00000148408;ENSG00000152822	K05175+K04849+K04603
Human Diseases	Cancers	Breast cancer	3	156	0.560068	0.985806	ko05224	ENSG00000102678;ENSG00000162344;ENSG00000157404	K04358+K22603+K05091
Human Diseases	Cancers	Proteoglycans in cancer	4	212	0.561543	0.985806	ko05205	ENSG00000167244;ENSG00000197943;ENSG00000113302;ENSG00000178568	K13769+K05859+K05425+K05085
Metabolism	Lipid metabolism	Glycerophospholipid metabolism	2	101	0.565432	0.985806	ko00564	ENSG00000100078;ENSG00000168907	K01047+K16342
Organismal Systems	Environmental adaptation	Circadian entrainment	2	102	0.570813	0.985806	ko04713	ENSG00000178372;ENSG00000254706	K02183+K16513
Metabolism	Amino acid metabolism	Tryptophan metabolism	1	45	0.572304	0.985806	ko00380	ENSG00000140505	K07409
Human Diseases	Cancers	Prostate cancer	2	103	0.576146	0.985806	ko05215	ENSG00000184012;ENSG00000142515	K09633+K01351
Organismal Systems	Digestive system	Pancreatic secretion	2	105	0.586668	0.985806	ko04972	ENSG00000100078;ENSG00000001626	K01047+K05031
Metabolism	Glycan biosynthesis and metabolism	Other types of O-glycan biosynthesis	1	47	0.588193	0.985806	ko00514	ENSG00000185274	K00710
Environmental Information Processing	Signal transduction	mTOR signaling pathway	3	163	0.59004	0.985806	ko04150	ENSG00000116039;ENSG00000175766;ENSG00000151418	K02147+K03259+K02152
Environmental Information Processing	Signal transduction	PI3K-Akt signaling pathway	8	445	0.594252	0.985806	ko04151	ENSG00000102678;ENSG00000167244;ENSG00000281179;ENSG00000162344;ENSG00000178568;ENSG00000157404;ENSG00000136487;ENSG00000175766	K04358+K13769+K06856+K22603+K05085+K05091+K05438+K03259
Cellular Processes	Cell motility	Regulation of actin cytoskeleton	4	221	0.594673	0.985806	ko04810	ENSG00000102678;ENSG00000101349;ENSG00000162344;ENSG00000113889	K04358+K05736+K22603+K03898
Human Diseases	Endocrine and metabolic diseases	Type I diabetes mellitus	1	48	0.595915	0.985806	ko04940	ENSG00000113302	K05425
Metabolism	Lipid metabolism	Sphingolipid metabolism	1	49	0.603494	0.985806	ko00600	ENSG00000204099	K12357
Organismal Systems	Endocrine system	Glucagon signaling pathway	2	109	0.607133	0.985806	ko04922	ENSG00000178372;ENSG00000215644	K02183+K04583
Human Diseases	Infectious diseases	Chagas disease (American trypanosomiasis)	2	109	0.607133	0.985806	ko05142	ENSG00000113302;ENSG00000113889	K05425+K03898
Human Diseases	Endocrine and metabolic diseases	Type II diabetes mellitus	1	50	0.610932	0.985806	ko04930	ENSG00000148408	K04849
Environmental Information Processing	Signal transduction	Rap1 signaling pathway	4	226	0.612434	0.985806	ko04015	ENSG00000102678;ENSG00000162344;ENSG00000178372;ENSG00000157404	K04358+K22603+K02183+K05091
Organismal Systems	Immune system	T cell receptor signaling pathway	2	111	0.617076	0.985806	ko04660	ENSG00000101349;ENSG00000254126	K05736+K06459
Human Diseases	Immune diseases	Allograft rejection	2	111	0.617076	0.985806	ko05330	ENSG00000281179;ENSG00000113302	K06856+K05425
Organismal Systems	Immune system	Fc gamma R-mediated phagocytosis	3	170	0.618684	0.985806	ko04666	ENSG00000281179;ENSG00000168907;ENSG00000197943	K06856+K16342+K05859
Environmental Information Processing	Signal transduction	Jak-STAT signaling pathway	3	171	0.622664	0.985806	ko04630	ENSG00000113302;ENSG00000183709;ENSG00000136487	K05425+K22669+K05438
Human Diseases	Cancers	Hepatocellular carcinoma	3	172	0.626617	0.985806	ko05225	ENSG00000167244;ENSG00000197943;ENSG00000077080	K13769+K05859+K11652
Organismal Systems	Immune system	Hematopoietic cell lineage	3	173	0.630541	0.985806	ko04640	ENSG00000281179;ENSG00000157404;ENSG00000254126	K06856+K05091+K06459
Organismal Systems	Excretory system	Endocrine and other factor-regulated calcium reabsorption	1	54	0.639322	0.985806	ko04961	ENSG00000167748	K01325
Human Diseases	Immune diseases	Primary immunodeficiency	2	116	0.641092	0.985806	ko05340	ENSG00000281179;ENSG00000254126	K06856+K06459
Cellular Processes	Cellular community - eukaryotes	Tight junction	3	176	0.642145	0.985806	ko04530	ENSG00000001626;ENSG00000095203;ENSG00000152086	K05031+K21111+K07374
Human Diseases	Infectious diseases	Amoebiasis	3	177	0.645956	0.985806	ko05146	ENSG00000281179;ENSG00000197641;ENSG00000113302	K06856+K13963+K05425
Human Diseases	Infectious diseases	Malaria	1	55	0.646092	0.985806	ko05144	ENSG00000250361	K20925
Organismal Systems	Immune system	Leukocyte transendothelial migration	2	118	0.650363	0.985806	ko04670	ENSG00000197943;ENSG00000066032	K05859+K05691
Organismal Systems	Nervous system	Cholinergic synapse	2	118	0.650363	0.985806	ko04725	ENSG00000260458;ENSG00000148408	K05005+K04849
Environmental Information Processing	Signaling molecules and interaction	Cytokine-cytokine receptor interaction	5	302	0.669449	0.985806	ko04060	ENSG00000275385;ENSG00000113302;ENSG00000183709;ENSG00000136487;ENSG00000138696	K21094+K05425+K22669+K05438+K13578
Organismal Systems	Endocrine system	Growth hormone synthesis, secretion and action	2	124	0.677045	0.985806	ko04935	ENSG00000197943;ENSG00000136487	K05859+K05438
Metabolism	Metabolism of other amino acids	Glutathione metabolism	1	61	0.68414	0.985806	ko00480	ENSG00000167741	K00681
Organismal Systems	Digestive system	Mineral absorption	1	61	0.68414	0.985806	ko04978	ENSG00000174502	K14706
Organismal Systems	Nervous system	Neurotrophin signaling pathway	2	126	0.685566	0.985806	ko04722	ENSG00000197943;ENSG00000178372	K05859+K02183
Human Diseases	Infectious diseases	Shigellosis	4	251	0.693825	0.985806	ko05131	ENSG00000197943;ENSG00000140623;ENSG00000197153;ENSG00000196289	K05859+K16938+K11253+K08334
Organismal Systems	Endocrine system	Regulation of lipolysis in adipocyte	1	63	0.695896	0.985806	ko04923	ENSG00000043591	K04141
Human Diseases	Cancers	Endometrial cancer	1	63	0.695896	0.985806	ko05213	ENSG00000066032	K05691
Human Diseases	Infectious diseases	Kaposi sarcoma-associated herpesvirus infection	3	194	0.706379	0.985806	ko05167	ENSG00000197943;ENSG00000178372;ENSG00000196289	K05859+K02183+K08334
Metabolism	Lipid metabolism	Glycerolipid metabolism	1	65	0.707218	0.985806	ko00561	ENSG00000166391	K14457
Organismal Systems	Endocrine system	Cortisol synthesis and secretion	1	66	0.712721	0.985806	ko04927	ENSG00000140459	K00498
Cellular Processes	Transport and catabolism	Mitophagy - animal	1	68	0.72342	0.985806	ko04137	ENSG00000196289	K08334
Organismal Systems	Nervous system	Dopaminergic synapse	2	138	0.732903	0.985806	ko04728	ENSG00000148408;ENSG00000178372	K04849+K02183
Human Diseases	Substance dependence	Amphetamine addiction	1	70	0.733723	0.985806	ko05031	ENSG00000178372	K02183
Human Diseases	Cancers	Non-small cell lung cancer	1	70	0.733723	0.985806	ko05223	ENSG00000197943	K05859
Human Diseases	Immune diseases	Inflammatiory bowel disease (IBD)	1	70	0.733723	0.985806	ko05321	ENSG00000113302	K05425
Organismal Systems	Immune system	RIG-I-like receptor signaling pathway	1	71	0.738731	0.985806	ko04622	ENSG00000113302	K05425
Human Diseases	Cancers	Transcriptional misregulation in cancers	4	268	0.741853	0.985806	ko05202	ENSG00000184012;ENSG00000281179;ENSG00000126752;ENSG00000197153	K09633+K06856+K15624+K11253
Cellular Processes	Cell growth and death	p53 signaling pathway	1	72	0.743645	0.985806	ko04115	ENSG00000206075	K10139
Cellular Processes	Cellular community - eukaryotes	Adherens junction	1	72	0.743645	0.985806	ko04520	ENSG00000066032	K05691
Human Diseases	Cancers	Acute myeloid leukemia	1	72	0.743645	0.985806	ko05221	ENSG00000157404	K05091
Environmental Information Processing	Signal transduction	Apelin signaling pathway	2	141	0.743755	0.985806	ko04371	ENSG00000178372;ENSG00000196289	K02183+K08334
Organismal Systems	Endocrine system	Thyroid hormone synthesis	1	74	0.753199	0.986647	ko04918	ENSG00000118271	K20731
Human Diseases	Cancers	Central carbon metabolism in cancer	1	74	0.753199	0.986647	ko05230	ENSG00000157404	K05091
Organismal Systems	Immune system	Antigen processing and presentation	1	77	0.766871	0.990777	ko04612	ENSG00000254126	K06459
Organismal Systems	Endocrine system	Prolactin signaling pathway	1	78	0.771259	0.990777	ko04917	ENSG00000138039	K04248
Cellular Processes	Cellular community - eukaryotes	Signaling pathways regulating pluripotency of stem cells	2	150	0.774085	0.990777	ko04550	ENSG00000131721;ENSG00000138696	K18491+K13578
Environmental Information Processing	Signaling molecules and interaction	Cell adhesion molecules (CAMs)	2	153	0.783481	0.990777	ko04514	ENSG00000162706;ENSG00000254126	K06780+K06459
Organismal Systems	Immune system	B cell receptor signaling pathway	2	155	0.789554	0.990777	ko04662	ENSG00000281179;ENSG00000197943	K06856+K05859
Human Diseases	Infectious disease: viral	Human immunodeficiency virus 1 infection	3	225	0.795892	0.990777	ko05170	ENSG00000101349;ENSG00000197943;ENSG00000178372	K05736+K05859+K02183
Environmental Information Processing	Signal transduction	Hippo signaling pathway	2	159	0.801254	0.990777	ko04390	ENSG00000138696;ENSG00000066032	K13578+K05691
Human Diseases	Endocrine and metabolic diseases	Cushing syndrome	2	163	0.812378	0.990777	ko04934	ENSG00000140459;ENSG00000147571	K00498+K05256
Genetic Information Processing	Translation	RNA transport	2	165	0.817731	0.990777	ko03013	ENSG00000101210;ENSG00000175766	K03231+K03259
Environmental Information Processing	Signaling molecules and interaction	ECM-receptor interaction	1	91	0.821362	0.990777	ko04512	ENSG00000164946	K23380
Cellular Processes	Cell growth and death	Necroptosis	2	167	0.822947	0.990777	ko04217	ENSG00000168907;ENSG00000184270	K16342+K11251
Organismal Systems	Aging	Longevity regulating pathway - mammal	1	95	0.834461	0.990777	ko04211	ENSG00000175766	K03259
Environmental Information Processing	Signal transduction	TGF-beta signaling pathway	1	96	0.837583	0.990777	ko04350	ENSG00000138696	K13578
Organismal Systems	Immune system	IL-17 signaling pathway	1	97	0.840647	0.990777	ko04657	ENSG00000143556	K21126
Human Diseases	Cancers	MicroRNAs in cancer	2	176	0.844807	0.990777	ko05206	ENSG00000206075;ENSG00000197943	K10139+K05859
Environmental Information Processing	Signal transduction	NF-kappa B signaling pathway	2	178	0.849322	0.990777	ko04064	ENSG00000281179;ENSG00000197943	K06856+K05859
Human Diseases	Infectious diseases	Influenza A	2	179	0.851535	0.990777	ko05164	ENSG00000184012;ENSG00000113302	K09633+K05425
Environmental Information Processing	Signaling molecules and interaction	Viral protein interaction with cytokine and cytokine receptor	1	101	0.85234	0.990777	ko04061	ENSG00000275385	K21094
Organismal Systems	Immune system	Th1 and Th2 cell differentiation	1	101	0.85234	0.990777	ko04658	ENSG00000113302	K05425
Human Diseases	Endocrine and metabolic diseases	AGE-RAGE signaling pathway in diabetic complications	1	103	0.857863	0.990777	ko04933	ENSG00000197943	K05859
Organismal Systems	Immune system	NOD-like receptor signaling pathway	2	184	0.862164	0.990777	ko04621	ENSG00000274209;ENSG00000173612	K20909+K04622
Human Diseases	Immune diseases	Asthma	1	105	0.86318	0.990777	ko05310	ENSG00000281179	K06856
Human Diseases	Cancers	Choline metabolism in cancer	1	107	0.868299	0.990777	ko05231	ENSG00000168907	K16342
Organismal Systems	Immune system	Natural killer cell mediated cytotoxicity	2	188	0.870163	0.990777	ko04650	ENSG00000281179;ENSG00000197943	K06856+K05859
Organismal Systems	Immune system	Toll-like receptor signaling pathway	1	108	0.870787	0.990777	ko04620	ENSG00000113302	K05425
Human Diseases	Infectious diseases	Toxoplasmosis	1	113	0.882544	0.990777	ko05145	ENSG00000113302	K05425
Human Diseases	Infectious diseases	Human papillomavirus infection	4	346	0.892171	0.990777	ko05165	ENSG00000116039;ENSG00000105929;ENSG00000147614;ENSG00000151418	K02147+K02154+K02146+K02152
Organismal Systems	Immune system	Intestinal immune network for IgA production	1	123	0.902962	0.990777	ko04672	ENSG00000281179	K06856
Environmental Information Processing	Signal transduction	Sphingolipid signaling pathway	1	125	0.906601	0.990777	ko04071	ENSG00000113889	K03898
Environmental Information Processing	Signal transduction	AMPK signaling pathway	1	126	0.908369	0.990777	ko04152	ENSG00000001626	K05031
Human Diseases	Immune diseases	Autoimmune thyroid disease	1	126	0.908369	0.990777	ko05320	ENSG00000281179	K06856
Human Diseases	Neurodegenerative diseases	Huntington disease	3	288	0.909295	0.990777	ko05016	ENSG00000148408;ENSG00000152086;ENSG00000196289	K04849+K07374+K08334
Organismal Systems	Endocrine system	Thyroid hormone signaling pathway	1	129	0.913477	0.990777	ko04919	ENSG00000197943	K05859
Organismal Systems	Development	Osteoclast differentiation	1	133	0.91985	0.990777	ko04380	ENSG00000197943	K05859
Human Diseases	Cardiovascular diseases	Viral myocarditis	1	133	0.91985	0.990777	ko05416	ENSG00000281179	K06856
Metabolism	Nucleotide metabolism	Purine metabolism	1	135	0.922859	0.990777	ko00230	ENSG00000154678	K13755
Environmental Information Processing	Signal transduction	FoxO signaling pathway	1	139	0.928545	0.990777	ko04068	ENSG00000152822	K04603
Cellular Processes	Cell growth and death	Oocyte meiosis	1	139	0.928545	0.990777	ko04114	ENSG00000178372	K02183
Cellular Processes	Cell growth and death	Apoptosis	1	142	0.932534	0.990777	ko04210	ENSG00000152086	K07374
Genetic Information Processing	Folding, sorting and degradation	Ubiquitin mediated proteolysis	1	145	0.936302	0.990777	ko04120	ENSG00000189030	K03871
Cellular Processes	Transport and catabolism	Autophagy - animal	1	149	0.941002	0.990777	ko04140	ENSG00000196289	K08334
Human Diseases	Infectious diseases	Measles	1	150	0.942123	0.990777	ko05162	ENSG00000113302	K05425
Human Diseases	Infectious diseases	Hepatitis C	1	163	0.9549	0.993211	ko05160	ENSG00000204010	K14217
Cellular Processes	Cell growth and death	Cellular senescence	1	166	0.957425	0.993211	ko04218	ENSG00000178372	K02183
Environmental Information Processing	Signal transduction	Wnt signaling pathway	1	167	0.958235	0.993211	ko04310	ENSG00000185269	K19882
Human Diseases	Neurodegenerative diseases	Alzheimer disease	3	359	0.966693	0.993211	ko05010	ENSG00000178372;ENSG00000152086;ENSG00000196289	K02183+K07374+K08334
Human Diseases	Infectious diseases	Epstein-Barr virus infection	2	282	0.970447	0.993211	ko05169	ENSG00000281179;ENSG00000197943	K06856+K05859
Human Diseases	Infectious diseases	Pathogenic Escherichia coli infection	2	285	0.971866	0.993211	ko05130	ENSG00000281179;ENSG00000152086	K06856+K07374
Organismal Systems	Immune system	Chemokine signaling pathway	1	197	0.976556	0.993211	ko04062	ENSG00000275385	K21094
Cellular Processes	Cellular community - eukaryotes	Focal adhesion	1	205	0.979909	0.993211	ko04510	ENSG00000101349	K05736
Human Diseases	Infectious diseases	Human cytomegalovirus infection	1	234	0.988533	0.995357	ko05163	ENSG00000178372	K02183
Organismal Systems	Environmental adaptation	Thermogenesis	1	246	0.990913	0.995357	ko04714	ENSG00000077080	K11652
Human Diseases	Infectious diseases	Herpes simplex infection	1	573	0.999986	0.999986	ko05168	ENSG00000113302	K05425
