# Supplementary material for: High Expression of JMJD4 Is a Potential Diagnostic and Prognostic Marker of Renal Cell Carcinoma
Source: Dis Markers. 2021 Dec 24;2021:9573540. doi: 10.1155/2021/9573540 (PMC8720244; doi:10.1155/2021/9573540)
Supplement: Supplementary 3 — Supplemental material 3: details of the enriched genes in molecular function of GO analysis. [file 9573540.f3.xlsx]

## Sheet: out.F
GO ID	Description	out (399)	All (18408)	pvalue	p.adjust	Genes
GO:0022857	transmembrane transporter activity	52	1082	5.64622e-08	2.97287e-05	ENSG00000001626;ENSG00000004939;ENSG00000007216;ENSG00000055732;ENSG00000070729;ENSG00000072041;ENSG00000073150;ENSG00000075461;ENSG00000086159;ENSG00000099822;ENSG00000103546;ENSG00000105143;ENSG00000105642;ENSG00000105929;ENSG00000111319;ENSG00000112077;ENSG00000113073;ENSG00000115616;ENSG00000116039;ENSG00000118596;ENSG00000130433;ENSG00000132677;ENSG00000140519;ENSG00000143921;ENSG00000146411…
GO:0015267	channel activity	30	466	1.20094e-07	2.97287e-05	ENSG00000001626;ENSG00000055732;ENSG00000070729;ENSG00000073150;ENSG00000075461;ENSG00000086159;ENSG00000099822;ENSG00000105642;ENSG00000111319;ENSG00000112077;ENSG00000130433;ENSG00000147606;ENSG00000148408;ENSG00000149305;ENSG00000152208;ENSG00000155886;ENSG00000159248;ENSG00000162399;ENSG00000162763;ENSG00000164411;ENSG00000166828;ENSG00000170289;ENSG00000171714;ENSG00000174502;ENSG00000184908…
GO:0022803	passive transmembrane transporter activity	30	466	1.20094e-07	2.97287e-05	ENSG00000001626;ENSG00000055732;ENSG00000070729;ENSG00000073150;ENSG00000075461;ENSG00000086159;ENSG00000099822;ENSG00000105642;ENSG00000111319;ENSG00000112077;ENSG00000130433;ENSG00000147606;ENSG00000148408;ENSG00000149305;ENSG00000152208;ENSG00000155886;ENSG00000159248;ENSG00000162399;ENSG00000162763;ENSG00000164411;ENSG00000166828;ENSG00000170289;ENSG00000171714;ENSG00000174502;ENSG00000184908…
GO:0005215	transporter activity	54	1184	1.68323e-07	2.97287e-05	ENSG00000001626;ENSG00000004939;ENSG00000007216;ENSG00000055732;ENSG00000070729;ENSG00000072041;ENSG00000073150;ENSG00000075461;ENSG00000084674;ENSG00000086159;ENSG00000099822;ENSG00000103546;ENSG00000105143;ENSG00000105642;ENSG00000105929;ENSG00000111319;ENSG00000112077;ENSG00000113073;ENSG00000115616;ENSG00000116039;ENSG00000118596;ENSG00000130433;ENSG00000132677;ENSG00000140519;ENSG00000143921…
GO:0015075	ion transmembrane transporter activity	44	876	1.94815e-07	2.97287e-05	ENSG00000001626;ENSG00000004939;ENSG00000007216;ENSG00000055732;ENSG00000070729;ENSG00000072041;ENSG00000075461;ENSG00000086159;ENSG00000099822;ENSG00000103546;ENSG00000105143;ENSG00000105642;ENSG00000105929;ENSG00000111319;ENSG00000112077;ENSG00000113073;ENSG00000115616;ENSG00000116039;ENSG00000118596;ENSG00000130433;ENSG00000132677;ENSG00000140519;ENSG00000147606;ENSG00000147614;ENSG00000148408…
GO:0015318	inorganic molecular entity transmembrane transporter activity	40	818	1.4255e-06	0.000181276	ENSG00000001626;ENSG00000004939;ENSG00000007216;ENSG00000055732;ENSG00000070729;ENSG00000072041;ENSG00000075461;ENSG00000086159;ENSG00000099822;ENSG00000103546;ENSG00000105143;ENSG00000105642;ENSG00000105929;ENSG00000111319;ENSG00000113073;ENSG00000115616;ENSG00000116039;ENSG00000118596;ENSG00000130433;ENSG00000147606;ENSG00000147614;ENSG00000148408;ENSG00000149305;ENSG00000151418;ENSG00000152208…
GO:0005200	structural constituent of cytoskeleton	12	104	2.61568e-06	0.000285109	ENSG00000066032;ENSG00000077080;ENSG00000095203;ENSG00000152086;ENSG00000169067;ENSG00000171346;ENSG00000173898;ENSG00000185479;ENSG00000186081;ENSG00000186832;ENSG00000186847;ENSG00000205420
GO:0015106	bicarbonate transmembrane transporter activity	6	20	2.99266e-06	0.000285425	ENSG00000001626;ENSG00000004939;ENSG00000113073;ENSG00000147606;ENSG00000174502;ENSG00000188687
GO:0022838	substrate-specific channel activity	25	424	6.59126e-06	0.000558792	ENSG00000001626;ENSG00000055732;ENSG00000070729;ENSG00000075461;ENSG00000086159;ENSG00000099822;ENSG00000105642;ENSG00000111319;ENSG00000130433;ENSG00000147606;ENSG00000148408;ENSG00000149305;ENSG00000152208;ENSG00000155886;ENSG00000162399;ENSG00000162763;ENSG00000166828;ENSG00000170289;ENSG00000171714;ENSG00000174502;ENSG00000184908;ENSG00000186038;ENSG00000186297;ENSG00000186510;ENSG00000260458
GO:0005216	ion channel activity	24	411	1.18479e-05	0.000857421	ENSG00000001626;ENSG00000055732;ENSG00000070729;ENSG00000075461;ENSG00000099822;ENSG00000105642;ENSG00000111319;ENSG00000130433;ENSG00000147606;ENSG00000148408;ENSG00000149305;ENSG00000152208;ENSG00000155886;ENSG00000162399;ENSG00000162763;ENSG00000166828;ENSG00000170289;ENSG00000171714;ENSG00000174502;ENSG00000184908;ENSG00000186038;ENSG00000186297;ENSG00000186510;ENSG00000260458
GO:0015103	inorganic anion transmembrane transporter activity	13	141	1.23613e-05	0.000857421	ENSG00000001626;ENSG00000004939;ENSG00000086159;ENSG00000103546;ENSG00000113073;ENSG00000147606;ENSG00000162399;ENSG00000171714;ENSG00000174502;ENSG00000184908;ENSG00000186297;ENSG00000186510;ENSG00000188687
GO:0099516	ion antiporter activity	8	57	2.96514e-05	0.00188534	ENSG00000004939;ENSG00000113073;ENSG00000115616;ENSG00000147606;ENSG00000155886;ENSG00000174502;ENSG00000180251;ENSG00000188687
GO:0022839	ion gated channel activity	20	333	4.27071e-05	0.00250658	ENSG00000001626;ENSG00000055732;ENSG00000070729;ENSG00000075461;ENSG00000099822;ENSG00000105642;ENSG00000111319;ENSG00000130433;ENSG00000148408;ENSG00000149305;ENSG00000152208;ENSG00000162763;ENSG00000166828;ENSG00000170289;ENSG00000171714;ENSG00000184908;ENSG00000186038;ENSG00000186297;ENSG00000186510;ENSG00000260458
GO:0015108	chloride transmembrane transporter activity	10	98	5.24909e-05	0.00261372	ENSG00000001626;ENSG00000004939;ENSG00000103546;ENSG00000147606;ENSG00000162399;ENSG00000171714;ENSG00000174502;ENSG00000184908;ENSG00000186297;ENSG00000186510
GO:0015276	ligand-gated ion channel activity	12	140	5.48094e-05	0.00261372	ENSG00000001626;ENSG00000055732;ENSG00000070729;ENSG00000099822;ENSG00000111319;ENSG00000149305;ENSG00000152208;ENSG00000166828;ENSG00000170289;ENSG00000186038;ENSG00000186297;ENSG00000260458
GO:0022834	ligand-gated channel activity	12	140	5.48094e-05	0.00261372	ENSG00000001626;ENSG00000055732;ENSG00000070729;ENSG00000099822;ENSG00000111319;ENSG00000149305;ENSG00000152208;ENSG00000166828;ENSG00000170289;ENSG00000186038;ENSG00000186297;ENSG00000260458
GO:0022836	gated channel activity	20	342	6.19035e-05	0.00277837	ENSG00000001626;ENSG00000055732;ENSG00000070729;ENSG00000075461;ENSG00000099822;ENSG00000105642;ENSG00000111319;ENSG00000130433;ENSG00000148408;ENSG00000149305;ENSG00000152208;ENSG00000162763;ENSG00000166828;ENSG00000170289;ENSG00000171714;ENSG00000184908;ENSG00000186038;ENSG00000186297;ENSG00000186510;ENSG00000260458
GO:0008324	cation transmembrane transporter activity	30	644	7.52314e-05	0.00309667	ENSG00000007216;ENSG00000055732;ENSG00000070729;ENSG00000072041;ENSG00000075461;ENSG00000099822;ENSG00000103546;ENSG00000105143;ENSG00000105642;ENSG00000105929;ENSG00000111319;ENSG00000112077;ENSG00000113073;ENSG00000115616;ENSG00000116039;ENSG00000130433;ENSG00000132677;ENSG00000140519;ENSG00000147614;ENSG00000148408;ENSG00000149305;ENSG00000151418;ENSG00000155886;ENSG00000162763;ENSG00000166828…
GO:0015081	sodium ion transmembrane transporter activity	12	145	7.71124e-05	0.00309667	ENSG00000007216;ENSG00000072041;ENSG00000099822;ENSG00000103546;ENSG00000105143;ENSG00000111319;ENSG00000113073;ENSG00000115616;ENSG00000155886;ENSG00000166828;ENSG00000180251;ENSG00000188687
GO:0008509	anion transmembrane transporter activity	19	337	0.000151498	0.00577965	ENSG00000001626;ENSG00000004939;ENSG00000007216;ENSG00000072041;ENSG00000086159;ENSG00000103546;ENSG00000105143;ENSG00000113073;ENSG00000118596;ENSG00000147606;ENSG00000162399;ENSG00000166558;ENSG00000171714;ENSG00000174502;ENSG00000182107;ENSG00000184908;ENSG00000186297;ENSG00000186510;ENSG00000188687
GO:0005254	chloride channel activity	8	73	0.00017845	0.00648367	ENSG00000001626;ENSG00000147606;ENSG00000162399;ENSG00000171714;ENSG00000174502;ENSG00000184908;ENSG00000186297;ENSG00000186510
GO:0004111	creatine kinase activity	3	6	0.000192555	0.00667814	ENSG00000131730;ENSG00000223572;ENSG00000237289
GO:0022890	inorganic cation transmembrane transporter activity	27	589	0.000222524	0.00738201	ENSG00000007216;ENSG00000055732;ENSG00000070729;ENSG00000072041;ENSG00000075461;ENSG00000099822;ENSG00000103546;ENSG00000105143;ENSG00000105642;ENSG00000105929;ENSG00000111319;ENSG00000113073;ENSG00000115616;ENSG00000116039;ENSG00000130433;ENSG00000147614;ENSG00000148408;ENSG00000149305;ENSG00000151418;ENSG00000155886;ENSG00000162763;ENSG00000166828;ENSG00000170289;ENSG00000180251;ENSG00000186038…
GO:0030280	structural constituent of epidermis	4	15	0.00024555	0.00780644	ENSG00000124102;ENSG00000169474;ENSG00000203785;ENSG00000241233
GO:0004252	serine-type endopeptidase activity	12	167	0.000292343	0.0089223	ENSG00000087128;ENSG00000103269;ENSG00000116176;ENSG00000142515;ENSG00000167748;ENSG00000167754;ENSG00000167757;ENSG00000174562;ENSG00000184012;ENSG00000186474;ENSG00000187054;ENSG00000269741
GO:0016775	phosphotransferase activity, nitrogenous group as acceptor	3	7	0.00033155	0.00972972	ENSG00000131730;ENSG00000223572;ENSG00000237289
GO:0022804	active transmembrane transporter activity	19	361	0.00036141	0.0102132	ENSG00000001626;ENSG00000004939;ENSG00000007216;ENSG00000072041;ENSG00000103546;ENSG00000105143;ENSG00000105929;ENSG00000113073;ENSG00000115616;ENSG00000118596;ENSG00000143921;ENSG00000147606;ENSG00000147614;ENSG00000151418;ENSG00000155886;ENSG00000164363;ENSG00000174502;ENSG00000180251;ENSG00000188687
GO:0015301	anion:anion antiporter activity	5	30	0.000425277	0.0115888	ENSG00000004939;ENSG00000113073;ENSG00000147606;ENSG00000174502;ENSG00000188687
GO:0005179	hormone activity	10	127	0.00045009	0.011842	ENSG00000101440;ENSG00000104918;ENSG00000110680;ENSG00000118271;ENSG00000136487;ENSG00000147571;ENSG00000159224;ENSG00000161610;ENSG00000163273;ENSG00000167244
GO:0015297	antiporter activity	8	84	0.000470775	0.0119734	ENSG00000004939;ENSG00000113073;ENSG00000115616;ENSG00000147606;ENSG00000155886;ENSG00000174502;ENSG00000180251;ENSG00000188687
GO:0005217	intracellular ligand-gated ion channel activity	5	31	0.000498127	0.0122604	ENSG00000001626;ENSG00000055732;ENSG00000070729;ENSG00000099822;ENSG00000170289
GO:0005253	anion channel activity	8	86	0.000551911	0.0131596	ENSG00000001626;ENSG00000147606;ENSG00000162399;ENSG00000171714;ENSG00000174502;ENSG00000184908;ENSG00000186297;ENSG00000186510
GO:0015077	monovalent inorganic cation transmembrane transporter activity	19	377	0.00061402	0.0141969	ENSG00000007216;ENSG00000072041;ENSG00000099822;ENSG00000103546;ENSG00000105143;ENSG00000105642;ENSG00000105929;ENSG00000111319;ENSG00000113073;ENSG00000115616;ENSG00000116039;ENSG00000147614;ENSG00000151418;ENSG00000155886;ENSG00000162763;ENSG00000166828;ENSG00000180251;ENSG00000188687;ENSG00000260458
GO:0099094	ligand-gated cation channel activity	9	110	0.000652004	0.0146317	ENSG00000055732;ENSG00000070729;ENSG00000099822;ENSG00000111319;ENSG00000149305;ENSG00000166828;ENSG00000170289;ENSG00000186038;ENSG00000260458
GO:0015291	secondary active transmembrane transporter activity	14	238	0.000726014	0.0155679	ENSG00000004939;ENSG00000007216;ENSG00000072041;ENSG00000103546;ENSG00000105143;ENSG00000113073;ENSG00000115616;ENSG00000118596;ENSG00000147606;ENSG00000155886;ENSG00000164363;ENSG00000174502;ENSG00000180251;ENSG00000188687
GO:0008236	serine-type peptidase activity	12	185	0.000734528	0.0155679	ENSG00000087128;ENSG00000103269;ENSG00000116176;ENSG00000142515;ENSG00000167748;ENSG00000167754;ENSG00000167757;ENSG00000174562;ENSG00000184012;ENSG00000186474;ENSG00000187054;ENSG00000269741
GO:0005222	intracellular cAMP-activated cation channel activity	3	9	0.000770367	0.0156494	ENSG00000070729;ENSG00000099822;ENSG00000170289
GO:0005198	structural molecule activity	30	740	0.00079111	0.0156494	ENSG00000066032;ENSG00000073150;ENSG00000077080;ENSG00000095203;ENSG00000124102;ENSG00000125363;ENSG00000131737;ENSG00000142449;ENSG00000146021;ENSG00000152086;ENSG00000152595;ENSG00000163209;ENSG00000169067;ENSG00000169344;ENSG00000169469;ENSG00000169474;ENSG00000170454;ENSG00000171346;ENSG00000171557;ENSG00000171560;ENSG00000171564;ENSG00000173898;ENSG00000185479;ENSG00000186081;ENSG00000186832…
GO:0030506	ankyrin binding	4	20	0.000799904	0.0156494	ENSG00000004939;ENSG00000112077;ENSG00000132677;ENSG00000140519
GO:0017171	serine hydrolase activity	12	189	0.000886028	0.016901	ENSG00000087128;ENSG00000103269;ENSG00000116176;ENSG00000142515;ENSG00000167748;ENSG00000167754;ENSG00000167757;ENSG00000174562;ENSG00000184012;ENSG00000186474;ENSG00000187054;ENSG00000269741
GO:0005221	intracellular cyclic nucleotide activated cation channel activity	3	12	0.00192222	0.0349204	ENSG00000070729;ENSG00000099822;ENSG00000170289
GO:0043855	cyclic nucleotide-gated ion channel activity	3	12	0.00192222	0.0349204	ENSG00000070729;ENSG00000099822;ENSG00000170289
GO:0005452	inorganic anion exchanger activity	3	13	0.00245895	0.0436321	ENSG00000004939;ENSG00000113073;ENSG00000188687
GO:0046873	metal ion transmembrane transporter activity	19	428	0.00265768	0.0460866	ENSG00000007216;ENSG00000055732;ENSG00000072041;ENSG00000075461;ENSG00000099822;ENSG00000103546;ENSG00000105143;ENSG00000105642;ENSG00000111319;ENSG00000113073;ENSG00000115616;ENSG00000130433;ENSG00000148408;ENSG00000155886;ENSG00000162763;ENSG00000166828;ENSG00000180251;ENSG00000188687;ENSG00000260458
GO:0099530	G protein-coupled receptor activity involved in regulation of postsynaptic membrane potential	2	4	0.0027318	0.0463191	ENSG00000043591;ENSG00000152822
GO:0004175	endopeptidase activity	19	442	0.00377265	0.0606384	ENSG00000069206;ENSG00000087128;ENSG00000096088;ENSG00000103269;ENSG00000104755;ENSG00000105141;ENSG00000116176;ENSG00000142515;ENSG00000143839;ENSG00000159763;ENSG00000167748;ENSG00000167754;ENSG00000167757;ENSG00000174562;ENSG00000178031;ENSG00000184012;ENSG00000186474;ENSG00000187054;ENSG00000269741
GO:0015370	solute:sodium symporter activity	6	69	0.00379207	0.0606384	ENSG00000007216;ENSG00000072041;ENSG00000103546;ENSG00000105143;ENSG00000113073;ENSG00000188687
GO:0022829	wide pore channel activity	4	30	0.00381473	0.0606384	ENSG00000073150;ENSG00000159248;ENSG00000164411;ENSG00000188910
GO:0015293	symporter activity	9	144	0.00420817	0.0636488	ENSG00000007216;ENSG00000072041;ENSG00000103546;ENSG00000105143;ENSG00000113073;ENSG00000118596;ENSG00000155886;ENSG00000164363;ENSG00000188687
GO:0008514	organic anion transmembrane transporter activity	12	228	0.00423529	0.0636488	ENSG00000001626;ENSG00000004939;ENSG00000007216;ENSG00000072041;ENSG00000105143;ENSG00000113073;ENSG00000118596;ENSG00000147606;ENSG00000166558;ENSG00000174502;ENSG00000182107;ENSG00000188687
GO:0022850	serotonin-gated cation-selective channel activity	2	5	0.00448776	0.0636488	ENSG00000149305;ENSG00000186038
GO:0005261	cation channel activity	15	321	0.00453532	0.0636488	ENSG00000055732;ENSG00000070729;ENSG00000075461;ENSG00000099822;ENSG00000105642;ENSG00000111319;ENSG00000130433;ENSG00000148408;ENSG00000149305;ENSG00000155886;ENSG00000162763;ENSG00000166828;ENSG00000170289;ENSG00000186038;ENSG00000260458
GO:0017081	chloride channel regulator activity	3	16	0.00458805	0.0636488	ENSG00000001626;ENSG00000162399;ENSG00000196632
GO:0019841	retinol binding	3	16	0.00458805	0.0636488	ENSG00000143320;ENSG00000166426;ENSG00000198099
GO:0022821	potassium ion antiporter activity	3	16	0.00458805	0.0636488	ENSG00000115616;ENSG00000155886;ENSG00000180251
GO:0008519	ammonium transmembrane transporter activity	4	32	0.00483838	0.065923	ENSG00000103546;ENSG00000112077;ENSG00000132677;ENSG00000140519
GO:0016918	retinal binding	3	18	0.0064745	0.0843797	ENSG00000143320;ENSG00000166426;ENSG00000198099
GO:0003828	alpha-N-acetylneuraminate alpha-2,8-sialyltransferase activity	2	6	0.00663536	0.0843797	ENSG00000101638;ENSG00000177511
GO:0004030	aldehyde dehydrogenase [NAD(P)+] activity	2	6	0.00663536	0.0843797	ENSG00000132746;ENSG00000198099
GO:0008510	sodium:bicarbonate symporter activity	2	6	0.00663536	0.0843797	ENSG00000113073;ENSG00000188687
GO:0004745	retinol dehydrogenase activity	3	19	0.00756641	0.0946422	ENSG00000080511;ENSG00000198099;ENSG00000248144
GO:0005501	retinoid binding	4	37	0.00816465	0.098883	ENSG00000143320;ENSG00000166426;ENSG00000198099;ENSG00000242366
GO:0019840	isoprenoid binding	4	37	0.00816465	0.098883	ENSG00000143320;ENSG00000166426;ENSG00000198099;ENSG00000242366
GO:0001972	retinoic acid binding	3	20	0.00876051	0.102746	ENSG00000143320;ENSG00000166426;ENSG00000242366
GO:0005310	dicarboxylic acid transmembrane transporter activity	4	38	0.00897229	0.102746	ENSG00000007216;ENSG00000105143;ENSG00000147606;ENSG00000174502
GO:0004024	alcohol dehydrogenase activity, zinc-dependent	2	7	0.00915689	0.102746	ENSG00000198099;ENSG00000248144
GO:0005223	intracellular cGMP-activated cation channel activity	2	7	0.00915689	0.102746	ENSG00000070729;ENSG00000170289
GO:0017153	sodium:dicarboxylate symporter activity	2	7	0.00915689	0.102746	ENSG00000007216;ENSG00000105143
GO:0005243	gap junction channel activity	3	22	0.0114626	0.126754	ENSG00000159248;ENSG00000164411;ENSG00000188910
GO:0046961	proton-transporting ATPase activity, rotational mechanism	3	23	0.0129737	0.141414	ENSG00000105929;ENSG00000147614;ENSG00000151418
GO:0019531	oxalate transmembrane transporter activity	2	9	0.0152537	0.158535	ENSG00000147606;ENSG00000174502
GO:0030492	hemoglobin binding	2	9	0.0152537	0.158535	ENSG00000004939;ENSG00000223609
GO:0030414	peptidase inhibitor activity	9	181	0.0174248	0.158535	ENSG00000101074;ENSG00000101435;ENSG00000113889;ENSG00000124102;ENSG00000145879;ENSG00000164266;ENSG00000175121;ENSG00000197641;ENSG00000206075
GO:0004190	aspartic-type endopeptidase activity	3	26	0.0181599	0.158535	ENSG00000096088;ENSG00000143839;ENSG00000159763
GO:0015491	cation:cation antiporter activity	3	26	0.0181599	0.158535	ENSG00000115616;ENSG00000155886;ENSG00000180251
GO:0019864	IgG binding	2	10	0.0187964	0.158535	ENSG00000159763;ENSG00000169344
GO:0019869	chloride channel inhibitor activity	2	10	0.0187964	0.158535	ENSG00000001626;ENSG00000196632
GO:0036312	phosphatidylinositol 3-kinase regulatory subunit binding	2	10	0.0187964	0.158535	ENSG00000147689;ENSG00000168143
GO:0015294	solute:cation symporter activity	6	97	0.0189347	0.158535	ENSG00000007216;ENSG00000072041;ENSG00000103546;ENSG00000105143;ENSG00000113073;ENSG00000188687
GO:0004867	serine-type endopeptidase inhibitor activity	6	98	0.0198142	0.158535	ENSG00000124102;ENSG00000145879;ENSG00000164266;ENSG00000175121;ENSG00000197641;ENSG00000206075
GO:0070001	aspartic-type peptidase activity	3	27	0.0201085	0.158535	ENSG00000096088;ENSG00000143839;ENSG00000159763
GO:0003947	(N-acetylneuraminyl)-galactosylglucosylceramide N-acetylgalactosaminyltransferase activity	1	1	0.0216754	0.158535	ENSG00000135454
GO:0004131	cytosine deaminase activity	1	1	0.0216754	0.158535	ENSG00000111701
GO:0004940	beta1-adrenergic receptor activity	1	1	0.0216754	0.158535	ENSG00000043591
GO:0005020	stem cell factor receptor activity	1	1	0.0216754	0.158535	ENSG00000157404
GO:0005260	intracellularly ATP-gated chloride channel activity	1	1	0.0216754	0.158535	ENSG00000001626
GO:0005477	pyruvate secondary active transmembrane transporter activity	1	1	0.0216754	0.158535	ENSG00000118596
GO:0008386	cholesterol monooxygenase (side-chain-cleaving) activity	1	1	0.0216754	0.158535	ENSG00000140459
GO:0015112	nitrate transmembrane transporter activity	1	1	0.0216754	0.158535	ENSG00000086159
GO:0015361	low-affinity sodium:dicarboxylate symporter activity	1	1	0.0216754	0.158535	ENSG00000007216
GO:0017045	corticotropin-releasing hormone activity	1	1	0.0216754	0.158535	ENSG00000147571
GO:0019115	benzaldehyde dehydrogenase activity	1	1	0.0216754	0.158535	ENSG00000198099
GO:0031771	type 1 hypocretin receptor binding	1	1	0.0216754	0.158535	ENSG00000161610
GO:0031772	type 2 hypocretin receptor binding	1	1	0.0216754	0.158535	ENSG00000161610
GO:0035472	choriogonadotropin hormone receptor activity	1	1	0.0216754	0.158535	ENSG00000138039
GO:0036393	thiocyanate peroxidase activity	1	1	0.0216754	0.158535	ENSG00000167419
GO:0038106	choriogonadotropin hormone binding	1	1	0.0216754	0.158535	ENSG00000138039
GO:0042164	interleukin-12 alpha subunit binding	1	1	0.0216754	0.158535	ENSG00000113302
GO:0042324	hypocretin receptor binding	1	1	0.0216754	0.158535	ENSG00000161610
GO:0098872	G protein-coupled neurotransmitter receptor activity involved in regulation of postsynaptic cytosolic calcium ion concentration	1	1	0.0216754	0.158535	ENSG00000152822
GO:0099142	intracellularly ATP-gated ion channel activity	1	1	0.0216754	0.158535	ENSG00000001626
GO:0106138	Sec61 translocon complex binding	1	1	0.0216754	0.158535	ENSG00000001626
GO:1990699	palmitoleyl hydrolase activity	1	1	0.0216754	0.158535	ENSG00000185269
GO:0005343	organic acid:sodium symporter activity	3	28	0.0221677	0.158535	ENSG00000007216;ENSG00000072041;ENSG00000105143
GO:0036442	proton-exporting ATPase activity	3	28	0.0221677	0.158535	ENSG00000105929;ENSG00000147614;ENSG00000151418
GO:0004022	alcohol dehydrogenase (NAD) activity	2	11	0.0226478	0.158535	ENSG00000198099;ENSG00000248144
GO:0005247	voltage-gated chloride channel activity	2	11	0.0226478	0.158535	ENSG00000184908;ENSG00000186510
GO:0015280	ligand-gated sodium channel activity	2	11	0.0226478	0.158535	ENSG00000111319;ENSG00000166828
GO:0015386	potassium:proton antiporter activity	2	11	0.0226478	0.158535	ENSG00000115616;ENSG00000180251
GO:0098960	postsynaptic neurotransmitter receptor activity	4	50	0.0228799	0.158703	ENSG00000043591;ENSG00000152208;ENSG00000152822;ENSG00000186297
GO:0048018	receptor ligand activity	18	495	0.0231894	0.159401	ENSG00000101440;ENSG00000102678;ENSG00000104918;ENSG00000110680;ENSG00000113302;ENSG00000118271;ENSG00000125363;ENSG00000136487;ENSG00000147571;ENSG00000159224;ENSG00000160182;ENSG00000161610;ENSG00000162344;ENSG00000163273;ENSG00000167244;ENSG00000183709;ENSG00000241186;ENSG00000275385
GO:0005184	neuropeptide hormone activity	3	29	0.0243375	0.165799	ENSG00000101440;ENSG00000147571;ENSG00000161610
GO:0008083	growth factor activity	8	164	0.0267806	0.176233	ENSG00000102678;ENSG00000113302;ENSG00000125363;ENSG00000136487;ENSG00000160182;ENSG00000162344;ENSG00000167244;ENSG00000241186
GO:0005451	monovalent cation:proton antiporter activity	2	12	0.026793	0.176233	ENSG00000115616;ENSG00000180251
GO:0008271	secondary active sulfate transmembrane transporter activity	2	12	0.026793	0.176233	ENSG00000147606;ENSG00000174502
GO:0015385	sodium:proton antiporter activity	2	12	0.026793	0.176233	ENSG00000115616;ENSG00000180251
GO:0005544	calcium-dependent phospholipid binding	4	53	0.0276698	0.180445	ENSG00000103528;ENSG00000110975;ENSG00000168907;ENSG00000265190
GO:0015298	solute:cation antiporter activity	3	31	0.0290083	0.187571	ENSG00000115616;ENSG00000155886;ENSG00000180251
GO:0030545	receptor regulator activity	19	547	0.0301851	0.19354	ENSG00000101440;ENSG00000102678;ENSG00000104918;ENSG00000110680;ENSG00000113302;ENSG00000118271;ENSG00000125363;ENSG00000126950;ENSG00000136487;ENSG00000147571;ENSG00000159224;ENSG00000160182;ENSG00000161610;ENSG00000162344;ENSG00000163273;ENSG00000167244;ENSG00000183709;ENSG00000241186;ENSG00000275385
GO:0070011	peptidase activity, acting on L-amino acid peptides	21	623	0.0311225	0.197887	ENSG00000069206;ENSG00000087128;ENSG00000096088;ENSG00000103269;ENSG00000104755;ENSG00000105141;ENSG00000116176;ENSG00000142515;ENSG00000143839;ENSG00000159763;ENSG00000167741;ENSG00000167748;ENSG00000167754;ENSG00000167757;ENSG00000174562;ENSG00000178031;ENSG00000184012;ENSG00000186474;ENSG00000187054;ENSG00000189401;ENSG00000269741
GO:0030594	neurotransmitter receptor activity	6	111	0.0338563	0.213491	ENSG00000043591;ENSG00000149305;ENSG00000152208;ENSG00000152822;ENSG00000186038;ENSG00000186297
GO:0005102	signaling receptor binding	47	1661	0.0354973	0.222004	ENSG00000035720;ENSG00000043591;ENSG00000075461;ENSG00000084674;ENSG00000101440;ENSG00000102678;ENSG00000104755;ENSG00000104918;ENSG00000110680;ENSG00000112530;ENSG00000113302;ENSG00000113889;ENSG00000116194;ENSG00000118271;ENSG00000125363;ENSG00000129152;ENSG00000131094;ENSG00000131910;ENSG00000136487;ENSG00000143556;ENSG00000143839;ENSG00000144227;ENSG00000145147;ENSG00000147571;ENSG00000159224…
GO:0004866	endopeptidase inhibitor activity	8	175	0.0372442	0.222565	ENSG00000101435;ENSG00000113889;ENSG00000124102;ENSG00000145879;ENSG00000164266;ENSG00000175121;ENSG00000197641;ENSG00000206075
GO:0071855	neuropeptide receptor binding	3	35	0.039662	0.222565	ENSG00000101440;ENSG00000147571;ENSG00000161610
GO:0005283	amino acid:sodium symporter activity	2	15	0.0408483	0.222565	ENSG00000072041;ENSG00000105143
GO:0005328	neurotransmitter:sodium symporter activity	2	15	0.0408483	0.222565	ENSG00000103546;ENSG00000105143
GO:0005344	oxygen carrier activity	2	15	0.0408483	0.222565	ENSG00000165553;ENSG00000223609
GO:0030553	cGMP binding	2	15	0.0408483	0.222565	ENSG00000070729;ENSG00000170289
GO:0036122	BMP binding	2	15	0.0408483	0.222565	ENSG00000138696;ENSG00000165623
GO:0022824	transmitter-gated ion channel activity	4	60	0.0410144	0.222565	ENSG00000149305;ENSG00000152208;ENSG00000186038;ENSG00000186297
GO:0022835	transmitter-gated channel activity	4	60	0.0410144	0.222565	ENSG00000149305;ENSG00000152208;ENSG00000186038;ENSG00000186297
GO:0016247	channel regulator activity	7	148	0.0425627	0.222565	ENSG00000001626;ENSG00000075461;ENSG00000129991;ENSG00000130433;ENSG00000162399;ENSG00000162763;ENSG00000196632
GO:0004946	bombesin receptor activity	1	2	0.042882	0.222565	ENSG00000102239
GO:0004964	luteinizing hormone receptor activity	1	2	0.042882	0.222565	ENSG00000138039
GO:0005298	proline:sodium symporter activity	1	2	0.042882	0.222565	ENSG00000072041
GO:0016492	G protein-coupled neurotensin receptor activity	1	2	0.042882	0.222565	ENSG00000169006
GO:0019972	interleukin-12 binding	1	2	0.042882	0.222565	ENSG00000113302
GO:0031716	calcitonin receptor binding	1	2	0.042882	0.222565	ENSG00000110680
GO:0031769	glucagon receptor binding	1	2	0.042882	0.222565	ENSG00000159224
GO:0031894	V1A vasopressin receptor binding	1	2	0.042882	0.222565	ENSG00000166148
GO:0045519	interleukin-23 receptor binding	1	2	0.042882	0.222565	ENSG00000113302
GO:0047704	bile-salt sulfotransferase activity	1	2	0.042882	0.222565	ENSG00000196228
GO:0050262	ribosylnicotinamide kinase activity	1	2	0.042882	0.222565	ENSG00000077009
GO:0051903	S-(hydroxymethyl)glutathione dehydrogenase activity	1	2	0.042882	0.222565	ENSG00000198099
GO:0061769	ribosylnicotinate kinase activity	1	2	0.042882	0.222565	ENSG00000077009
GO:0099579	G protein-coupled neurotransmitter receptor activity involved in regulation of postsynaptic membrane potential	1	2	0.042882	0.222565	ENSG00000043591
GO:0008233	peptidase activity	21	646	0.0431335	0.222565	ENSG00000069206;ENSG00000087128;ENSG00000096088;ENSG00000103269;ENSG00000104755;ENSG00000105141;ENSG00000116176;ENSG00000142515;ENSG00000143839;ENSG00000159763;ENSG00000167741;ENSG00000167748;ENSG00000167754;ENSG00000167757;ENSG00000174562;ENSG00000178031;ENSG00000184012;ENSG00000186474;ENSG00000187054;ENSG00000189401;ENSG00000269741
GO:0097110	scaffold protein binding	4	61	0.0431713	0.222565	ENSG00000152208;ENSG00000171346;ENSG00000186081;ENSG00000197943
GO:0030551	cyclic nucleotide binding	3	37	0.0456322	0.228049	ENSG00000070729;ENSG00000099822;ENSG00000170289
GO:0044769	ATPase activity, coupled to transmembrane movement of ions, rotational mechanism	3	37	0.0456322	0.228049	ENSG00000105929;ENSG00000147614;ENSG00000151418
GO:0005159	insulin-like growth factor receptor binding	2	16	0.0460283	0.228049	ENSG00000143839;ENSG00000167244
GO:0015116	sulfate transmembrane transporter activity	2	16	0.0460283	0.228049	ENSG00000147606;ENSG00000174502
GO:0015556	C4-dicarboxylate transmembrane transporter activity	2	16	0.0460283	0.228049	ENSG00000007216;ENSG00000105143
GO:0047498	calcium-dependent phospholipase A2 activity	2	16	0.0460283	0.228049	ENSG00000100078;ENSG00000168907
GO:0099106	ion channel regulator activity	6	120	0.0466149	0.229466	ENSG00000001626;ENSG00000075461;ENSG00000129991;ENSG00000130433;ENSG00000162763;ENSG00000196632
GO:0008308	voltage-gated anion channel activity	2	17	0.0514344	0.250084	ENSG00000184908;ENSG00000186510
GO:0061135	endopeptidase regulator activity	8	187	0.051459	0.250084	ENSG00000101435;ENSG00000113889;ENSG00000124102;ENSG00000145879;ENSG00000164266;ENSG00000175121;ENSG00000197641;ENSG00000206075
GO:0008200	ion channel inhibitor activity	3	39	0.0520198	0.25121	ENSG00000001626;ENSG00000129991;ENSG00000196632
GO:0061134	peptidase regulator activity	9	222	0.0533825	0.256169	ENSG00000101074;ENSG00000101435;ENSG00000113889;ENSG00000124102;ENSG00000145879;ENSG00000164266;ENSG00000175121;ENSG00000197641;ENSG00000206075
GO:0016248	channel inhibitor activity	3	40	0.0553669	0.264031	ENSG00000001626;ENSG00000129991;ENSG00000196632
GO:0099095	ligand-gated anion channel activity	2	18	0.0570544	0.269721	ENSG00000001626;ENSG00000186297
GO:0015079	potassium ion transmembrane transporter activity	7	160	0.0599408	0.269721	ENSG00000099822;ENSG00000105642;ENSG00000115616;ENSG00000155886;ENSG00000162763;ENSG00000180251;ENSG00000260458
GO:0015078	proton transmembrane transporter activity	6	129	0.0620037	0.269721	ENSG00000105929;ENSG00000115616;ENSG00000116039;ENSG00000147614;ENSG00000151418;ENSG00000180251
GO:0005416	amino acid:cation symporter activity	2	19	0.0628766	0.269721	ENSG00000072041;ENSG00000105143
GO:0015299	solute:proton antiporter activity	2	19	0.0628766	0.269721	ENSG00000115616;ENSG00000180251
GO:0098918	structural constituent of synapse	2	19	0.0628766	0.269721	ENSG00000169067;ENSG00000173898
GO:0004027	alcohol sulfotransferase activity	1	3	0.0636302	0.269721	ENSG00000196228
GO:0004117	calmodulin-dependent cyclic-nucleotide phosphodiesterase activity	1	3	0.0636302	0.269721	ENSG00000154678
GO:0004967	glucagon receptor activity	1	3	0.0636302	0.269721	ENSG00000215644
GO:0005157	macrophage colony-stimulating factor receptor binding	1	3	0.0636302	0.269721	ENSG00000035720
GO:0005334	norepinephrine:sodium symporter activity	1	3	0.0636302	0.269721	ENSG00000103546
GO:0017095	heparan sulfate 6-O-sulfotransferase activity	1	3	0.0636302	0.269721	ENSG00000185352
GO:0019002	GMP binding	1	3	0.0636302	0.269721	ENSG00000066382
GO:0030172	troponin C binding	1	3	0.0636302	0.269721	ENSG00000129991
GO:0030298	receptor signaling protein tyrosine kinase activator activity	1	3	0.0636302	0.269721	ENSG00000196711
GO:0031893	vasopressin receptor binding	1	3	0.0636302	0.269721	ENSG00000166148
GO:0035276	ethanol binding	1	3	0.0636302	0.269721	ENSG00000198099
GO:0036313	phosphatidylinositol 3-kinase catalytic subunit binding	1	3	0.0636302	0.269721	ENSG00000168143
GO:0048101	calcium- and calmodulin-regulated 3',5'-cyclic-GMP phosphodiesterase activity	1	3	0.0636302	0.269721	ENSG00000154678
GO:0099583	neurotransmitter receptor activity involved in regulation of postsynaptic cytosolic calcium ion concentration	1	3	0.0636302	0.269721	ENSG00000152822
GO:0046943	carboxylic acid transmembrane transporter activity	7	163	0.064877	0.273487	ENSG00000007216;ENSG00000072041;ENSG00000105143;ENSG00000118596;ENSG00000147606;ENSG00000166558;ENSG00000174502
GO:0042562	hormone binding	5	100	0.0663904	0.27758	ENSG00000118271;ENSG00000128310;ENSG00000138039;ENSG00000166148;ENSG00000215644
GO:0005342	organic acid transmembrane transporter activity	7	164	0.0665756	0.27758	ENSG00000007216;ENSG00000072041;ENSG00000105143;ENSG00000118596;ENSG00000147606;ENSG00000166558;ENSG00000174502
GO:0005246	calcium channel regulator activity	3	44	0.0697411	0.282107	ENSG00000075461;ENSG00000129991;ENSG00000130433
GO:0005272	sodium channel activity	3	44	0.0697411	0.282107	ENSG00000099822;ENSG00000111319;ENSG00000166828
GO:0005244	voltage-gated ion channel activity	8	200	0.0703615	0.282107	ENSG00000075461;ENSG00000099822;ENSG00000130433;ENSG00000148408;ENSG00000162763;ENSG00000184908;ENSG00000186510;ENSG00000260458
GO:0005543	phospholipid binding	15	454	0.070699	0.282107	ENSG00000035720;ENSG00000084674;ENSG00000103528;ENSG00000105388;ENSG00000110975;ENSG00000137766;ENSG00000139144;ENSG00000140623;ENSG00000147697;ENSG00000168297;ENSG00000168907;ENSG00000173898;ENSG00000183578;ENSG00000188282;ENSG00000265190
GO:0022832	voltage-gated channel activity	8	201	0.0719702	0.282107	ENSG00000075461;ENSG00000099822;ENSG00000130433;ENSG00000148408;ENSG00000162763;ENSG00000184908;ENSG00000186510;ENSG00000260458
GO:0008201	heparin binding	7	168	0.0736361	0.282107	ENSG00000084674;ENSG00000102678;ENSG00000113889;ENSG00000137440;ENSG00000145147;ENSG00000169393;ENSG00000198732
GO:0098772	molecular function regulator	50	1878	0.0736935	0.282107	ENSG00000001626;ENSG00000043591;ENSG00000044012;ENSG00000075461;ENSG00000101074;ENSG00000101435;ENSG00000101440;ENSG00000102678;ENSG00000104918;ENSG00000110680;ENSG00000111701;ENSG00000113302;ENSG00000113889;ENSG00000118271;ENSG00000119698;ENSG00000124102;ENSG00000125363;ENSG00000126950;ENSG00000129991;ENSG00000130433;ENSG00000135824;ENSG00000136487;ENSG00000137392;ENSG00000145087;ENSG00000145147…
GO:0005230	extracellular ligand-gated ion channel activity	4	73	0.0738917	0.282107	ENSG00000149305;ENSG00000152208;ENSG00000186038;ENSG00000186297
GO:0008106	alcohol dehydrogenase (NADP+) activity	2	21	0.0750822	0.282107	ENSG00000080511;ENSG00000198099
GO:0008373	sialyltransferase activity	2	21	0.0750822	0.282107	ENSG00000101638;ENSG00000177511
GO:0005201	extracellular matrix structural constituent	7	169	0.0754679	0.282107	ENSG00000125363;ENSG00000142449;ENSG00000152595;ENSG00000169344;ENSG00000171557;ENSG00000171560;ENSG00000171564
GO:0005245	voltage-gated calcium channel activity	3	46	0.0774964	0.282107	ENSG00000075461;ENSG00000130433;ENSG00000148408
GO:0008188	neuropeptide receptor activity	3	46	0.0774964	0.282107	ENSG00000102239;ENSG00000128310;ENSG00000169006
GO:0017127	cholesterol transporter activity	2	22	0.0814441	0.282107	ENSG00000084674;ENSG00000143921
GO:0019865	immunoglobulin binding	2	22	0.0814441	0.282107	ENSG00000159763;ENSG00000169344
GO:0120020	intermembrane cholesterol transfer activity	2	22	0.0814441	0.282107	ENSG00000084674;ENSG00000143921
GO:0003960	NADPH:quinone reductase activity	1	4	0.0839296	0.282107	ENSG00000198099
GO:0004035	alkaline phosphatase activity	1	4	0.0839296	0.282107	ENSG00000163283
GO:0004308	exo-alpha-sialidase activity	1	4	0.0839296	0.282107	ENSG00000204099
GO:0004939	beta-adrenergic receptor activity	1	4	0.0839296	0.282107	ENSG00000043591
GO:0004966	galanin receptor activity	1	4	0.0839296	0.282107	ENSG00000128310
GO:0005314	high-affinity glutamate transmembrane transporter activity	1	4	0.0839296	0.282107	ENSG00000105143
GO:0005330	dopamine:sodium symporter activity	1	4	0.0839296	0.282107	ENSG00000103546
GO:0005503	all-trans retinal binding	1	4	0.0839296	0.282107	ENSG00000198099
GO:0005534	galactose binding	1	4	0.0839296	0.282107	ENSG00000158270
GO:0015247	aminophospholipid transmembrane transporter activity	1	4	0.0839296	0.282107	ENSG00000182107
GO:0015501	glutamate:sodium symporter activity	1	4	0.0839296	0.282107	ENSG00000105143
GO:0016286	small conductance calcium-activated potassium channel activity	1	4	0.0839296	0.282107	ENSG00000105642
GO:0016997	alpha-sialidase activity	1	4	0.0839296	0.282107	ENSG00000204099
GO:0031014	troponin T binding	1	4	0.0839296	0.282107	ENSG00000129991
GO:0031781	type 3 melanocortin receptor binding	1	4	0.0839296	0.282107	ENSG00000101440
GO:0031782	type 4 melanocortin receptor binding	1	4	0.0839296	0.282107	ENSG00000101440
GO:0033695	oxidoreductase activity, acting on CH or CH2 groups, quinone or similar compound as acceptor	1	4	0.0839296	0.282107	ENSG00000140505
GO:0034875	caffeine oxidase activity	1	4	0.0839296	0.282107	ENSG00000140505
GO:0046848	hydroxyapatite binding	1	4	0.0839296	0.282107	ENSG00000125363
GO:0051430	corticotropin-releasing hormone receptor 1 binding	1	4	0.0839296	0.282107	ENSG00000147571
GO:0051431	corticotropin-releasing hormone receptor 2 binding	1	4	0.0839296	0.282107	ENSG00000147571
GO:0052794	exo-alpha-(2->3)-sialidase activity	1	4	0.0839296	0.282107	ENSG00000204099
GO:0052795	exo-alpha-(2->6)-sialidase activity	1	4	0.0839296	0.282107	ENSG00000204099
GO:0052796	exo-alpha-(2->8)-sialidase activity	1	4	0.0839296	0.282107	ENSG00000204099
GO:0080030	methyl indole-3-acetate esterase activity	1	4	0.0839296	0.282107	ENSG00000159398
GO:0098973	structural constituent of postsynaptic actin cytoskeleton	1	4	0.0839296	0.282107	ENSG00000169067
GO:0102953	hypoglycin A gamma-glutamyl transpeptidase activity	1	4	0.0839296	0.282107	ENSG00000167741
GO:0103068	leukotriene C4 gamma-glutamyl transferase activity	1	4	0.0839296	0.282107	ENSG00000167741
GO:0099529	neurotransmitter receptor activity involved in regulation of postsynaptic membrane potential	3	48	0.0856111	0.286497	ENSG00000043591;ENSG00000152208;ENSG00000186297
GO:0019905	syntaxin binding	4	77	0.0860555	0.286726	ENSG00000103528;ENSG00000110975;ENSG00000137766;ENSG00000145087
GO:0030552	cAMP binding	2	23	0.0879651	0.290551	ENSG00000070729;ENSG00000099822
GO:0120015	intermembrane sterol transfer activity	2	23	0.0879651	0.290551	ENSG00000084674;ENSG00000143921
GO:0022843	voltage-gated cation channel activity	6	143	0.0912447	0.300085	ENSG00000075461;ENSG00000099822;ENSG00000130433;ENSG00000148408;ENSG00000162763;ENSG00000260458
GO:0046982	protein heterodimerization activity	12	359	0.0923643	0.302463	ENSG00000043591;ENSG00000112246;ENSG00000113302;ENSG00000143921;ENSG00000184270;ENSG00000197153;ENSG00000204897;ENSG00000242366;ENSG00000242515;ENSG00000274618;ENSG00000275126;ENSG00000276410
GO:0020037	heme binding	6	144	0.0935773	0.305126	ENSG00000140459;ENSG00000140505;ENSG00000165553;ENSG00000167210;ENSG00000167419;ENSG00000223609
GO:0052689	carboxylic ester hydrolase activity	6	145	0.0959419	0.311505	ENSG00000100078;ENSG00000100341;ENSG00000133742;ENSG00000159398;ENSG00000168907;ENSG00000185269
GO:0017046	peptide hormone binding	3	51	0.0984233	0.313011	ENSG00000128310;ENSG00000166148;ENSG00000215644
GO:0004869	cysteine-type endopeptidase inhibitor activity	3	52	0.102857	0.313011	ENSG00000101435;ENSG00000113889;ENSG00000197641
GO:0004028	3-chloroallyl aldehyde dehydrogenase activity	1	5	0.10379	0.313011	ENSG00000132746
GO:0004096	catalase activity	1	5	0.10379	0.313011	ENSG00000167210
GO:0005025	transforming growth factor beta receptor activity, type I	1	5	0.10379	0.313011	ENSG00000138696
GO:0008048	calcium sensitive guanylate cyclase activator activity	1	5	0.10379	0.313011	ENSG00000044012
GO:0008273	calcium, potassium:sodium antiporter activity	1	5	0.10379	0.313011	ENSG00000155886
GO:0016167	glial cell-derived neurotrophic factor receptor activity	1	5	0.10379	0.313011	ENSG00000125861
GO:0031694	alpha-2A adrenergic receptor binding	1	5	0.10379	0.313011	ENSG00000043591
GO:0031721	hemoglobin alpha binding	1	5	0.10379	0.313011	ENSG00000223609
GO:0031779	melanocortin receptor binding	1	5	0.10379	0.313011	ENSG00000101440
GO:0038100	nodal binding	1	5	0.10379	0.313011	ENSG00000241186
GO:0050833	pyruvate transmembrane transporter activity	1	5	0.10379	0.313011	ENSG00000118596
GO:0052659	inositol-1,3,4,5-tetrakisphosphate 5-phosphatase activity	1	5	0.10379	0.313011	ENSG00000185133
GO:0099103	channel activator activity	1	5	0.10379	0.313011	ENSG00000162763
GO:0099104	potassium channel activator activity	1	5	0.10379	0.313011	ENSG00000162763
GO:0101021	estrogen 2-hydroxylase activity	1	5	0.10379	0.313011	ENSG00000140505
GO:1990430	extracellular matrix protein binding	1	5	0.10379	0.313011	ENSG00000152595
GO:0001664	G protein-coupled receptor binding	10	292	0.104381	0.313555	ENSG00000043591;ENSG00000101440;ENSG00000110680;ENSG00000112530;ENSG00000147571;ENSG00000159224;ENSG00000161610;ENSG00000166148;ENSG00000183971;ENSG00000275385
GO:0008528	G protein-coupled peptide receptor activity	6	149	0.105716	0.316319	ENSG00000102239;ENSG00000128310;ENSG00000138039;ENSG00000166148;ENSG00000169006;ENSG00000215644
GO:0004601	peroxidase activity	3	53	0.107368	0.320007	ENSG00000167210;ENSG00000167419;ENSG00000223609
GO:0005104	fibroblast growth factor receptor binding	2	26	0.108386	0.321783	ENSG00000102678;ENSG00000162344
GO:0005326	neurotransmitter transporter activity	3	54	0.111955	0.32645	ENSG00000072041;ENSG00000103546;ENSG00000105143
GO:0008066	glutamate receptor activity	2	27	0.115448	0.32645	ENSG00000152208;ENSG00000152822
GO:0102567	phospholipase A2 activity (consuming 1,2-dipalmitoylphosphatidylcholine)	2	27	0.115448	0.32645	ENSG00000100078;ENSG00000168907
GO:0102568	phospholipase A2 activity consuming 1,2-dioleoylphosphatidylethanolamine)	2	27	0.115448	0.32645	ENSG00000100078;ENSG00000168907
GO:0001653	peptide receptor activity	6	153	0.115986	0.32645	ENSG00000102239;ENSG00000128310;ENSG00000138039;ENSG00000166148;ENSG00000169006;ENSG00000215644
GO:0005262	calcium channel activity	5	119	0.116832	0.32645	ENSG00000055732;ENSG00000075461;ENSG00000130433;ENSG00000148408;ENSG00000155886
GO:0042626	ATPase activity, coupled to transmembrane movement of substances	5	119	0.116832	0.32645	ENSG00000001626;ENSG00000105929;ENSG00000143921;ENSG00000147614;ENSG00000151418
GO:0046906	tetrapyrrole binding	6	154	0.118629	0.32645	ENSG00000140459;ENSG00000140505;ENSG00000165553;ENSG00000167210;ENSG00000167419;ENSG00000223609
GO:0004033	aldo-keto reductase (NADP) activity	2	28	0.122623	0.32645	ENSG00000080511;ENSG00000198099
GO:0015405	P-P-bond-hydrolysis-driven transmembrane transporter activity	5	121	0.122975	0.32645	ENSG00000001626;ENSG00000105929;ENSG00000143921;ENSG00000147614;ENSG00000151418
GO:0002151	G-quadruplex RNA binding	1	6	0.123221	0.32645	ENSG00000131914
GO:0003846	2-acylglycerol O-acyltransferase activity	1	6	0.123221	0.32645	ENSG00000166391
GO:0004064	arylesterase activity	1	6	0.123221	0.32645	ENSG00000133742
GO:0004445	inositol-polyphosphate 5-phosphatase activity	1	6	0.123221	0.32645	ENSG00000185133
GO:0005143	interleukin-12 receptor binding	1	6	0.123221	0.32645	ENSG00000113302
GO:0010853	cyclase activator activity	1	6	0.123221	0.32645	ENSG00000044012
GO:0015129	lactate transmembrane transporter activity	1	6	0.123221	0.32645	ENSG00000118596
GO:0018455	alcohol dehydrogenase [NAD(P)+] activity	1	6	0.123221	0.32645	ENSG00000248144
GO:0030250	guanylate cyclase activator activity	1	6	0.123221	0.32645	ENSG00000044012
GO:0030345	structural constituent of tooth enamel	1	6	0.123221	0.32645	ENSG00000125363
GO:0034485	phosphatidylinositol-3,4,5-trisphosphate 5-phosphatase activity	1	6	0.123221	0.32645	ENSG00000185133
GO:0035473	lipase binding	1	6	0.123221	0.32645	ENSG00000084674
GO:0043237	laminin-1 binding	1	6	0.123221	0.32645	ENSG00000145147
GO:0043878	glyceraldehyde-3-phosphate dehydrogenase (NAD+) (non-phosphorylating) activity	1	6	0.123221	0.32645	ENSG00000132746
GO:0051429	corticotropin-releasing hormone receptor binding	1	6	0.123221	0.32645	ENSG00000147571
GO:0052743	inositol tetrakisphosphate phosphatase activity	1	6	0.123221	0.32645	ENSG00000185133
GO:0070324	thyroid hormone binding	1	6	0.123221	0.32645	ENSG00000118271
GO:0072345	NAADP-sensitive calcium-release channel activity	1	6	0.123221	0.32645	ENSG00000055732
GO:0140031	phosphorylation-dependent protein binding	1	6	0.123221	0.32645	ENSG00000197943
GO:1905538	polysome binding	1	6	0.123221	0.32645	ENSG00000131914
GO:1990254	keratin filament binding	1	6	0.123221	0.32645	ENSG00000186847
GO:0043178	alcohol binding	4	88	0.12404	0.327484	ENSG00000143320;ENSG00000155066;ENSG00000166426;ENSG00000198099
GO:0015399	primary active transmembrane transporter activity	5	122	0.126102	0.329629	ENSG00000001626;ENSG00000105929;ENSG00000143921;ENSG00000147614;ENSG00000151418
GO:0043492	ATPase activity, coupled to movement of substances	5	122	0.126102	0.329629	ENSG00000001626;ENSG00000105929;ENSG00000143921;ENSG00000147614;ENSG00000151418
GO:0016684	oxidoreductase activity, acting on peroxide as acceptor	3	57	0.126149	0.329629	ENSG00000167210;ENSG00000167419;ENSG00000223609
GO:0001786	phosphatidylserine binding	3	59	0.135952	0.354031	ENSG00000103528;ENSG00000110975;ENSG00000147697
GO:0004806	triglyceride lipase activity	2	30	0.137281	0.356277	ENSG00000100341;ENSG00000159398
GO:0005000	vasopressin receptor activity	1	7	0.142232	0.358161	ENSG00000166148
GO:0005004	GPI-linked ephrin receptor activity	1	7	0.142232	0.358161	ENSG00000145242
GO:0015141	succinate transmembrane transporter activity	1	7	0.142232	0.358161	ENSG00000007216
GO:0030249	guanylate cyclase regulator activity	1	7	0.142232	0.358161	ENSG00000044012
GO:0034235	GPI anchor binding	1	7	0.142232	0.358161	ENSG00000105388
GO:0035005	1-phosphatidylinositol-4-phosphate 3-kinase activity	1	7	0.142232	0.358161	ENSG00000139144
GO:0050291	sphingosine N-acyltransferase activity	1	7	0.142232	0.358161	ENSG00000149926
GO:0052658	inositol-1,4,5-trisphosphate 5-phosphatase activity	1	7	0.142232	0.358161	ENSG00000185133
GO:0098821	BMP receptor activity	1	7	0.142232	0.358161	ENSG00000138696
GO:0043548	phosphatidylinositol 3-kinase binding	2	32	0.152298	0.382247	ENSG00000147689;ENSG00000168143
GO:0016298	lipase activity	5	132	0.159291	0.392058	ENSG00000100078;ENSG00000100341;ENSG00000159398;ENSG00000168907;ENSG00000197943
GO:0005154	epidermal growth factor receptor binding	2	33	0.159922	0.392058	ENSG00000168143;ENSG00000178568
GO:0050699	WW domain binding	2	33	0.159922	0.392058	ENSG00000111319;ENSG00000166828
GO:0120013	intermembrane lipid transfer activity	2	33	0.159922	0.392058	ENSG00000084674;ENSG00000143921
GO:0004771	sterol esterase activity	1	8	0.160831	0.392058	ENSG00000159398
GO:0035381	ATP-gated ion channel activity	1	8	0.160831	0.392058	ENSG00000001626
GO:0036374	glutathione hydrolase activity	1	8	0.160831	0.392058	ENSG00000167741
GO:0048495	Roundabout binding	1	8	0.160831	0.392058	ENSG00000145147
GO:0101020	estrogen 16-alpha-hydroxylase activity	1	8	0.160831	0.392058	ENSG00000140505
GO:0015020	glucuronosyltransferase activity	2	34	0.167615	0.406	ENSG00000242366;ENSG00000242515
GO:0015248	sterol transporter activity	2	34	0.167615	0.406	ENSG00000084674;ENSG00000143921
GO:0015085	calcium ion transmembrane transporter activity	5	135	0.169881	0.410187	ENSG00000055732;ENSG00000075461;ENSG00000130433;ENSG00000148408;ENSG00000155886
GO:0008289	lipid binding	21	775	0.17382	0.416459	ENSG00000035720;ENSG00000055732;ENSG00000084674;ENSG00000103528;ENSG00000105388;ENSG00000110975;ENSG00000137766;ENSG00000139144;ENSG00000140623;ENSG00000143320;ENSG00000147697;ENSG00000155066;ENSG00000166426;ENSG00000168297;ENSG00000168907;ENSG00000173898;ENSG00000183578;ENSG00000188282;ENSG00000198099;ENSG00000242366;ENSG00000265190
GO:0004623	phospholipase A2 activity	2	35	0.17537	0.416459	ENSG00000100078;ENSG00000168907
GO:0001640	adenylate cyclase inhibiting G protein-coupled glutamate receptor activity	1	9	0.179028	0.416459	ENSG00000152822
GO:0004439	phosphatidylinositol-4,5-bisphosphate 5-phosphatase activity	1	9	0.179028	0.416459	ENSG00000185133
GO:0008504	monoamine transmembrane transporter activity	1	9	0.179028	0.416459	ENSG00000103546
GO:0010851	cyclase regulator activity	1	9	0.179028	0.416459	ENSG00000044012
GO:0015183	L-aspartate transmembrane transporter activity	1	9	0.179028	0.416459	ENSG00000105143
GO:0016713	oxidoreductase activity, acting on paired donors, with incorporation or reduction of molecular oxygen, reduced iron-sulfur protein as one donor, and incorporation of one atom of oxygen	1	9	0.179028	0.416459	ENSG00000140459
GO:0016725	oxidoreductase activity, acting on CH or CH2 groups	1	9	0.179028	0.416459	ENSG00000140505
GO:0034594	phosphatidylinositol trisphosphate phosphatase activity	1	9	0.179028	0.416459	ENSG00000185133
GO:0097200	cysteine-type endopeptidase activity involved in execution phase of apoptosis	1	9	0.179028	0.416459	ENSG00000105141
GO:0098988	G protein-coupled glutamate receptor activity	1	9	0.179028	0.416459	ENSG00000152822
GO:0019829	cation-transporting ATPase activity	3	68	0.182928	0.420983	ENSG00000105929;ENSG00000147614;ENSG00000151418
GO:0022853	active ion transmembrane transporter activity	3	68	0.182928	0.420983	ENSG00000105929;ENSG00000147614;ENSG00000151418
GO:0042625	ATPase coupled ion transmembrane transporter activity	3	68	0.182928	0.420983	ENSG00000105929;ENSG00000147614;ENSG00000151418
GO:0099528	G protein-coupled neurotransmitter receptor activity	2	36	0.18318	0.420983	ENSG00000043591;ENSG00000152822
GO:0008395	steroid hydroxylase activity	2	37	0.19104	0.432804	ENSG00000140459;ENSG00000140505
GO:0070851	growth factor receptor binding	5	142	0.195601	0.432804	ENSG00000102678;ENSG00000113302;ENSG00000162344;ENSG00000168143;ENSG00000178568
GO:0002162	dystroglycan binding	1	10	0.196832	0.432804	ENSG00000173467
GO:0003796	lysozyme activity	1	10	0.196832	0.432804	ENSG00000141316
GO:0004935	adrenergic receptor activity	1	10	0.196832	0.432804	ENSG00000043591
GO:0005131	growth hormone receptor binding	1	10	0.196832	0.432804	ENSG00000136487
GO:0008331	high voltage-gated calcium channel activity	1	10	0.196832	0.432804	ENSG00000148408
GO:0008526	phosphatidylinositol transporter activity	1	10	0.196832	0.432804	ENSG00000183578
GO:0016303	1-phosphatidylinositol-3-kinase activity	1	10	0.196832	0.432804	ENSG00000139144
GO:0019870	potassium channel inhibitor activity	1	10	0.196832	0.432804	ENSG00000196632
GO:0031720	haptoglobin binding	1	10	0.196832	0.432804	ENSG00000223609
GO:0046030	inositol trisphosphate phosphatase activity	1	10	0.196832	0.432804	ENSG00000185133
GO:0050656	3'-phosphoadenosine 5'-phosphosulfate binding	1	10	0.196832	0.432804	ENSG00000196228
GO:0050786	RAGE receptor binding	1	10	0.196832	0.432804	ENSG00000143556
GO:0089720	caspase binding	1	10	0.196832	0.432804	ENSG00000221867
GO:0016620	oxidoreductase activity, acting on the aldehyde or oxo group of donors, NAD or NADP as acceptor	2	38	0.198943	0.436189	ENSG00000132746;ENSG00000198099
GO:0035091	phosphatidylinositol binding	8	259	0.201566	0.440674	ENSG00000105388;ENSG00000139144;ENSG00000140623;ENSG00000147697;ENSG00000168297;ENSG00000183578;ENSG00000188282;ENSG00000265190
GO:0019825	oxygen binding	2	39	0.206885	0.45101	ENSG00000165553;ENSG00000223609
GO:0004062	aryl sulfotransferase activity	1	11	0.21425	0.456629	ENSG00000196228
GO:0008503	benzodiazepine receptor activity	1	11	0.21425	0.456629	ENSG00000186297
GO:0015368	calcium:cation antiporter activity	1	11	0.21425	0.456629	ENSG00000155886
GO:0015378	sodium:chloride symporter activity	1	11	0.21425	0.456629	ENSG00000103546
GO:0019855	calcium channel inhibitor activity	1	11	0.21425	0.456629	ENSG00000129991
GO:0052650	NADP-retinol dehydrogenase activity	1	11	0.21425	0.456629	ENSG00000080511
GO:0070697	activin receptor binding	1	11	0.21425	0.456629	ENSG00000241186
GO:0086080	protein binding involved in heterotypic cell-cell adhesion	1	11	0.21425	0.456629	ENSG00000186417
GO:1901681	sulfur compound binding	8	264	0.215675	0.458385	ENSG00000084674;ENSG00000102678;ENSG00000113889;ENSG00000137440;ENSG00000145147;ENSG00000169393;ENSG00000196228;ENSG00000198732
GO:0033293	monocarboxylic acid binding	3	74	0.216308	0.458454	ENSG00000143320;ENSG00000166426;ENSG00000242366
GO:0043014	alpha-tubulin binding	2	41	0.222862	0.468722	ENSG00000103546;ENSG00000112530
GO:0048487	beta-tubulin binding	2	41	0.222862	0.468722	ENSG00000103546;ENSG00000112530
GO:0004857	enzyme inhibitor activity	11	388	0.222996	0.468722	ENSG00000101074;ENSG00000101435;ENSG00000113889;ENSG00000124102;ENSG00000145147;ENSG00000145879;ENSG00000164266;ENSG00000175121;ENSG00000197641;ENSG00000206075;ENSG00000242366
GO:0000149	SNARE binding	4	113	0.229977	0.473125	ENSG00000103528;ENSG00000110975;ENSG00000137766;ENSG00000145087
GO:0000340	RNA 7-methylguanosine cap binding	1	12	0.231292	0.473125	ENSG00000175766
GO:0004032	alditol:NADP+ 1-oxidoreductase activity	1	12	0.231292	0.473125	ENSG00000198099
GO:0004126	cytidine deaminase activity	1	12	0.231292	0.473125	ENSG00000111701
GO:0005024	transforming growth factor beta-activated receptor activity	1	12	0.231292	0.473125	ENSG00000138696
GO:0034595	phosphatidylinositol phosphate 5-phosphatase activity	1	12	0.231292	0.473125	ENSG00000185133
GO:0035004	phosphatidylinositol 3-kinase activity	1	12	0.231292	0.473125	ENSG00000139144
GO:0042975	peroxisome proliferator activated receptor binding	1	12	0.231292	0.473125	ENSG00000131910
GO:0099186	structural constituent of postsynapse	1	12	0.231292	0.473125	ENSG00000169067
GO:1990825	sequence-specific mRNA binding	1	12	0.231292	0.473125	ENSG00000131914
GO:0046983	protein dimerization activity	27	1073	0.236958	0.48342	ENSG00000004939;ENSG00000043591;ENSG00000105388;ENSG00000112246;ENSG00000113302;ENSG00000129152;ENSG00000131910;ENSG00000140623;ENSG00000143921;ENSG00000145147;ENSG00000151365;ENSG00000157404;ENSG00000162706;ENSG00000171714;ENSG00000178403;ENSG00000178568;ENSG00000178860;ENSG00000179046;ENSG00000184270;ENSG00000187855;ENSG00000197153;ENSG00000204897;ENSG00000242366;ENSG00000242515;ENSG00000274618…
GO:0001784	phosphotyrosine residue binding	2	44	0.246987	0.492701	ENSG00000035720;ENSG00000197943
GO:0005068	transmembrane receptor protein tyrosine kinase adaptor activity	1	13	0.247965	0.492701	ENSG00000035720
GO:0015250	water channel activity	1	13	0.247965	0.492701	ENSG00000086159
GO:0015269	calcium-activated potassium channel activity	1	13	0.247965	0.492701	ENSG00000105642
GO:0015355	secondary active monocarboxylate transmembrane transporter activity	1	13	0.247965	0.492701	ENSG00000118596
GO:0022851	GABA-gated chloride ion channel activity	1	13	0.247965	0.492701	ENSG00000186297
GO:0031005	filamin binding	1	13	0.247965	0.492701	ENSG00000173641
GO:0031432	titin binding	1	13	0.247965	0.492701	ENSG00000158022
GO:0045159	myosin II binding	1	13	0.247965	0.492701	ENSG00000145087
GO:0106019	phosphatidylinositol-4,5-bisphosphate phosphatase activity	1	13	0.247965	0.492701	ENSG00000185133
GO:0015171	amino acid transmembrane transporter activity	3	80	0.250827	0.497093	ENSG00000072041;ENSG00000105143;ENSG00000166558
GO:1904315	transmitter-gated ion channel activity involved in regulation of postsynaptic membrane potential	2	45	0.255053	0.504159	ENSG00000152208;ENSG00000186297
GO:0005539	glycosaminoglycan binding	7	238	0.259119	0.507918	ENSG00000084674;ENSG00000102678;ENSG00000113889;ENSG00000137440;ENSG00000145147;ENSG00000169393;ENSG00000198732
GO:0016903	oxidoreductase activity, acting on the aldehyde or oxo group of donors	2	46	0.263124	0.507918	ENSG00000132746;ENSG00000198099
GO:1901682	sulfur compound transmembrane transporter activity	2	46	0.263124	0.507918	ENSG00000147606;ENSG00000174502
GO:0005095	GTPase inhibitor activity	1	14	0.264277	0.507918	ENSG00000145147
GO:0005313	L-glutamate transmembrane transporter activity	1	14	0.264277	0.507918	ENSG00000105143
GO:0008242	omega peptidase activity	1	14	0.264277	0.507918	ENSG00000167741
GO:0015373	anion:sodium symporter activity	1	14	0.264277	0.507918	ENSG00000103546
GO:0016208	AMP binding	1	14	0.264277	0.507918	ENSG00000066382
GO:0019992	diacylglycerol binding	1	14	0.264277	0.507918	ENSG00000137766
GO:0047555	3',5'-cyclic-GMP phosphodiesterase activity	1	14	0.264277	0.507918	ENSG00000154678
GO:0061783	peptidoglycan muralytic activity	1	14	0.264277	0.507918	ENSG00000141316
GO:0003779	actin binding	12	449	0.269884	0.51739	ENSG00000041515;ENSG00000066032;ENSG00000103546;ENSG00000112530;ENSG00000129991;ENSG00000146021;ENSG00000148935;ENSG00000159763;ENSG00000168297;ENSG00000170011;ENSG00000173898;ENSG00000265190
GO:0008376	acetylgalactosaminyltransferase activity	2	47	0.271195	0.518602	ENSG00000135454;ENSG00000185274
GO:0005044	scavenger receptor activity	2	48	0.279264	0.524069	ENSG00000158270;ENSG00000184012
GO:0070888	E-box binding	2	48	0.279264	0.524069	ENSG00000129152;ENSG00000178403
GO:0004089	carbonate dehydratase activity	1	15	0.280236	0.524069	ENSG00000133742
GO:0005237	inhibitory extracellular ligand-gated ion channel activity	1	15	0.280236	0.524069	ENSG00000186297
GO:0005372	water transmembrane transporter activity	1	15	0.280236	0.524069	ENSG00000086159
GO:0008494	translation activator activity	1	15	0.280236	0.524069	ENSG00000188120
GO:0016307	phosphatidylinositol phosphate kinase activity	1	15	0.280236	0.524069	ENSG00000139144
GO:0019215	intermediate filament binding	1	15	0.280236	0.524069	ENSG00000186847
GO:0097153	cysteine-type endopeptidase activity involved in apoptotic process	1	15	0.280236	0.524069	ENSG00000105141
GO:0005267	potassium channel activity	4	125	0.287031	0.529891	ENSG00000099822;ENSG00000105642;ENSG00000162763;ENSG00000260458
GO:0016209	antioxidant activity	3	87	0.291996	0.529891	ENSG00000167210;ENSG00000167419;ENSG00000223609
GO:0030165	PDZ domain binding	3	87	0.291996	0.529891	ENSG00000001626;ENSG00000043591;ENSG00000152208
GO:0005548	phospholipid transporter activity	2	50	0.295379	0.529891	ENSG00000182107;ENSG00000183578
GO:1901618	organic hydroxy compound transmembrane transporter activity	2	50	0.295379	0.529891	ENSG00000103546;ENSG00000118596
GO:0004888	transmembrane signaling receptor activity	32	1331	0.295531	0.529891	ENSG00000043591;ENSG00000102239;ENSG00000113302;ENSG00000125861;ENSG00000128310;ENSG00000138039;ENSG00000138696;ENSG00000145242;ENSG00000149305;ENSG00000152208;ENSG00000152822;ENSG00000153292;ENSG00000157404;ENSG00000159961;ENSG00000162897;ENSG00000165621;ENSG00000166148;ENSG00000169006;ENSG00000171496;ENSG00000171505;ENSG00000173612;ENSG00000178568;ENSG00000180016;ENSG00000181609;ENSG00000181616…
GO:0004029	aldehyde dehydrogenase (NAD) activity	1	16	0.29585	0.529891	ENSG00000132746
GO:0004115	3',5'-cyclic-AMP phosphodiesterase activity	1	16	0.29585	0.529891	ENSG00000154678
GO:0005005	transmembrane-ephrin receptor activity	1	16	0.29585	0.529891	ENSG00000145242
GO:0005229	intracellular calcium activated chloride channel activity	1	16	0.29585	0.529891	ENSG00000171714
GO:0015172	acidic amino acid transmembrane transporter activity	1	16	0.29585	0.529891	ENSG00000105143
GO:0030548	acetylcholine receptor regulator activity	1	16	0.29585	0.529891	ENSG00000126950
GO:0034483	heparan sulfate sulfotransferase activity	1	16	0.29585	0.529891	ENSG00000185352
GO:0052742	phosphatidylinositol kinase activity	1	16	0.29585	0.529891	ENSG00000139144
GO:0061778	intracellular chloride channel activity	1	16	0.29585	0.529891	ENSG00000171714
GO:0070492	oligosaccharide binding	1	16	0.29585	0.529891	ENSG00000158764
GO:0099602	neurotransmitter receptor regulator activity	1	16	0.29585	0.529891	ENSG00000126950
GO:1990756	protein binding, bridging involved in substrate recognition for ubiquitination	1	16	0.29585	0.529891	ENSG00000175093
GO:0051117	ATPase binding	3	88	0.297924	0.532356	ENSG00000105929;ENSG00000151418;ENSG00000174502
GO:0005249	voltage-gated potassium channel activity	3	89	0.303859	0.541692	ENSG00000099822;ENSG00000162763;ENSG00000260458
GO:0005509	calcium ion binding	18	723	0.306449	0.544471	ENSG00000095713;ENSG00000100362;ENSG00000103528;ENSG00000110975;ENSG00000134757;ENSG00000137766;ENSG00000142449;ENSG00000143556;ENSG00000145147;ENSG00000148408;ENSG00000154162;ENSG00000168907;ENSG00000169344;ENSG00000178372;ENSG00000183287;ENSG00000187492;ENSG00000198732;ENSG00000265190
GO:0072341	modified amino acid binding	3	90	0.309799	0.544471	ENSG00000103528;ENSG00000110975;ENSG00000147697
GO:0015377	cation:chloride symporter activity	1	17	0.311126	0.544471	ENSG00000103546
GO:0030169	low-density lipoprotein particle binding	1	17	0.311126	0.544471	ENSG00000158270
GO:0043495	protein membrane anchor	1	17	0.311126	0.544471	ENSG00000004939
GO:0046965	retinoid X receptor binding	1	17	0.311126	0.544471	ENSG00000131910
GO:0050811	GABA receptor binding	1	17	0.311126	0.544471	ENSG00000186297
GO:0052745	inositol phosphate phosphatase activity	1	17	0.311126	0.544471	ENSG00000185133
GO:0008081	phosphoric diester hydrolase activity	3	91	0.315742	0.551005	ENSG00000066382;ENSG00000154678;ENSG00000197943
GO:0002020	protease binding	4	131	0.316304	0.551005	ENSG00000157404;ENSG00000183287;ENSG00000197641;ENSG00000221867
GO:0004303	estradiol 17-beta-dehydrogenase activity	1	18	0.326071	0.562879	ENSG00000080511
GO:0008301	DNA binding, bending	1	18	0.326071	0.562879	ENSG00000168269
GO:0015278	calcium-release channel activity	1	18	0.326071	0.562879	ENSG00000055732
GO:0016500	protein-hormone receptor activity	1	18	0.326071	0.562879	ENSG00000138039
GO:0005080	protein kinase C binding	2	55	0.335379	0.574435	ENSG00000166148;ENSG00000242515
GO:0015459	potassium channel regulator activity	2	55	0.335379	0.574435	ENSG00000162763;ENSG00000196632
GO:0000339	RNA cap binding	1	19	0.340693	0.574435	ENSG00000175766
GO:0004675	transmembrane receptor protein serine/threonine kinase activity	1	19	0.340693	0.574435	ENSG00000138696
GO:0004890	GABA-A receptor activity	1	19	0.340693	0.574435	ENSG00000186297
GO:0004970	ionotropic glutamate receptor activity	1	19	0.340693	0.574435	ENSG00000152208
GO:0005003	ephrin receptor activity	1	19	0.340693	0.574435	ENSG00000145242
GO:0022840	leak channel activity	1	19	0.340693	0.574435	ENSG00000112077
GO:0022842	narrow pore channel activity	1	19	0.340693	0.574435	ENSG00000112077
GO:0030296	protein tyrosine kinase activator activity	1	19	0.340693	0.574435	ENSG00000196711
GO:0008146	sulfotransferase activity	2	56	0.343306	0.574435	ENSG00000185352;ENSG00000196228
GO:0045309	protein phosphorylated amino acid binding	2	56	0.343306	0.574435	ENSG00000035720;ENSG00000197943
GO:0050840	extracellular matrix binding	2	56	0.343306	0.574435	ENSG00000145147;ENSG00000198732
GO:0140104	molecular carrier activity	2	56	0.343306	0.574435	ENSG00000165553;ENSG00000223609
GO:0004653	polypeptide N-acetylgalactosaminyltransferase activity	1	20	0.354999	0.588835	ENSG00000185274
GO:0016411	acylglycerol O-acyltransferase activity	1	20	0.354999	0.588835	ENSG00000166391
GO:0031690	adrenergic receptor binding	1	20	0.354999	0.588835	ENSG00000043591
GO:0042288	MHC class I protein binding	1	20	0.354999	0.588835	ENSG00000254126
GO:0051427	hormone receptor binding	5	182	0.360199	0.594935	ENSG00000129152;ENSG00000131910;ENSG00000136487;ENSG00000147571;ENSG00000163273
GO:0019955	cytokine binding	4	140	0.360595	0.594935	ENSG00000113302;ENSG00000138696;ENSG00000157404;ENSG00000165623
GO:0004930	G protein-coupled receptor activity	20	838	0.361015	0.594935	ENSG00000043591;ENSG00000102239;ENSG00000128310;ENSG00000138039;ENSG00000152822;ENSG00000153292;ENSG00000159961;ENSG00000165621;ENSG00000166148;ENSG00000169006;ENSG00000171496;ENSG00000171505;ENSG00000173612;ENSG00000180016;ENSG00000181609;ENSG00000181616;ENSG00000183269;ENSG00000196917;ENSG00000197674;ENSG00000215644
GO:0005319	lipid transporter activity	4	141	0.365522	0.601063	ENSG00000084674;ENSG00000143921;ENSG00000182107;ENSG00000183578
GO:0016755	transferase activity, transferring amino-acyl groups	1	21	0.368995	0.604169	ENSG00000167741
GO:0051428	peptide hormone receptor binding	1	21	0.368995	0.604169	ENSG00000147571
GO:0005242	inward rectifier potassium channel activity	1	22	0.382688	0.618624	ENSG00000260458
GO:0008093	cytoskeletal adaptor activity	1	22	0.382688	0.618624	ENSG00000148935
GO:0015296	anion:cation symporter activity	1	22	0.382688	0.618624	ENSG00000103546
GO:0016917	GABA receptor activity	1	22	0.382688	0.618624	ENSG00000186297
GO:0030021	extracellular matrix structural constituent conferring compression resistance	1	22	0.382688	0.618624	ENSG00000125363
GO:0033691	sialic acid binding	1	22	0.382688	0.618624	ENSG00000177511
GO:0019199	transmembrane receptor protein kinase activity	4	145	0.385205	0.621377	ENSG00000138696;ENSG00000145242;ENSG00000157404;ENSG00000178568
GO:0008194	UDP-glycosyltransferase activity	4	147	0.395021	0.630923	ENSG00000135454;ENSG00000185274;ENSG00000242366;ENSG00000242515
GO:0005158	insulin receptor binding	1	23	0.396084	0.630923	ENSG00000167244
GO:0005248	voltage-gated sodium channel activity	1	23	0.396084	0.630923	ENSG00000099822
GO:0017134	fibroblast growth factor binding	1	23	0.396084	0.630923	ENSG00000137440
GO:0034593	phosphatidylinositol bisphosphate phosphatase activity	1	23	0.396084	0.630923	ENSG00000185133
GO:0050750	low-density lipoprotein particle receptor binding	1	23	0.396084	0.630923	ENSG00000084674
GO:0004222	metalloendopeptidase activity	3	106	0.404395	0.641483	ENSG00000069206;ENSG00000104755;ENSG00000178031
GO:0051087	chaperone binding	3	106	0.404395	0.641483	ENSG00000001626;ENSG00000112530;ENSG00000171564
GO:0004622	lysophospholipase activity	1	24	0.409191	0.643737	ENSG00000168907
GO:0008327	methyl-CpG binding	1	24	0.409191	0.643737	ENSG00000165556
GO:0038187	pattern recognition receptor activity	1	24	0.409191	0.643737	ENSG00000158270
GO:0070696	transmembrane receptor protein serine/threonine kinase binding	1	24	0.409191	0.643737	ENSG00000241186
GO:0004620	phospholipase activity	3	108	0.416019	0.653132	ENSG00000100078;ENSG00000168907;ENSG00000197943
GO:0015238	drug transmembrane transporter activity	3	109	0.421803	0.659828	ENSG00000007216;ENSG00000103546;ENSG00000105143
GO:0070330	aromatase activity	1	25	0.422013	0.659828	ENSG00000140505
GO:0004114	3',5'-cyclic-nucleotide phosphodiesterase activity	1	26	0.434558	0.673919	ENSG00000154678
GO:0004435	phosphatidylinositol phospholipase C activity	1	26	0.434558	0.673919	ENSG00000197943
GO:0042974	retinoic acid receptor binding	1	26	0.434558	0.673919	ENSG00000131910
GO:0097602	cullin family protein binding	1	26	0.434558	0.673919	ENSG00000146021
GO:0038023	signaling receptor activity	34	1518	0.446692	0.681865	ENSG00000043591;ENSG00000102239;ENSG00000113302;ENSG00000125861;ENSG00000128310;ENSG00000138039;ENSG00000138696;ENSG00000145242;ENSG00000149305;ENSG00000152208;ENSG00000152822;ENSG00000153292;ENSG00000157404;ENSG00000158270;ENSG00000159961;ENSG00000162897;ENSG00000165621;ENSG00000166148;ENSG00000169006;ENSG00000171496;ENSG00000171505;ENSG00000173612;ENSG00000178568;ENSG00000180016;ENSG00000181609…
GO:0003746	translation elongation factor activity	1	27	0.446832	0.681865	ENSG00000101210
GO:0004629	phospholipase C activity	1	27	0.446832	0.681865	ENSG00000197943
GO:0005227	calcium activated cation channel activity	1	27	0.446832	0.681865	ENSG00000105642
GO:0017075	syntaxin-1 binding	1	27	0.446832	0.681865	ENSG00000137766
GO:0035255	ionotropic glutamate receptor binding	1	27	0.446832	0.681865	ENSG00000075461
GO:0051861	glycolipid binding	1	27	0.446832	0.681865	ENSG00000105388
GO:0099604	ligand-gated calcium channel activity	1	27	0.446832	0.681865	ENSG00000055732
GO:0030276	clathrin binding	2	70	0.450142	0.685546	ENSG00000103528;ENSG00000110975
GO:0004112	cyclic-nucleotide phosphodiesterase activity	1	28	0.45884	0.693257	ENSG00000154678
GO:0043236	laminin binding	1	28	0.45884	0.693257	ENSG00000145147
GO:0043325	phosphatidylinositol-3,4-bisphosphate binding	1	28	0.45884	0.693257	ENSG00000265190
GO:0070325	lipoprotein particle receptor binding	1	28	0.45884	0.693257	ENSG00000084674
GO:0030971	receptor tyrosine kinase binding	2	72	0.46462	0.700602	ENSG00000035720;ENSG00000196711
GO:0071813	lipoprotein particle binding	1	29	0.470587	0.70581	ENSG00000158270
GO:0071814	protein-lipid complex binding	1	29	0.470587	0.70581	ENSG00000158270
GO:0017022	myosin binding	2	73	0.471774	0.70581	ENSG00000145087;ENSG00000170011
GO:0019003	GDP binding	2	73	0.471774	0.70581	ENSG00000140623;ENSG00000176490
GO:0016782	transferase activity, transferring sulfur-containing groups	2	74	0.47887	0.714228	ENSG00000185352;ENSG00000196228
GO:0033612	receptor serine/threonine kinase binding	1	30	0.482081	0.714228	ENSG00000241186
GO:0046966	thyroid hormone receptor binding	1	30	0.482081	0.714228	ENSG00000131910
GO:0070273	phosphatidylinositol-4-phosphate binding	1	30	0.482081	0.714228	ENSG00000147697
GO:0090079	translation regulator activity, nucleic acid binding	1	30	0.482081	0.714228	ENSG00000188120
GO:0051015	actin filament binding	5	213	0.491842	0.726654	ENSG00000041515;ENSG00000066032;ENSG00000129991;ENSG00000148935;ENSG00000265190
GO:0033764	steroid dehydrogenase activity, acting on the CH-OH group of donors, NAD or NADP as acceptor	1	31	0.493325	0.726654	ENSG00000080511
GO:0035198	miRNA binding	1	31	0.493325	0.726654	ENSG00000131914
GO:0015605	organophosphate ester transmembrane transporter activity	1	32	0.504326	0.735757	ENSG00000182107
GO:0019239	deaminase activity	1	32	0.504326	0.735757	ENSG00000111701
GO:0030332	cyclin binding	1	32	0.504326	0.735757	ENSG00000143320
GO:0042287	MHC protein binding	1	32	0.504326	0.735757	ENSG00000254126
GO:0043539	protein serine/threonine kinase activator activity	1	32	0.504326	0.735757	ENSG00000167244
GO:0060089	molecular transducer activity	34	1560	0.513106	0.747138	ENSG00000043591;ENSG00000102239;ENSG00000113302;ENSG00000125861;ENSG00000128310;ENSG00000138039;ENSG00000138696;ENSG00000145242;ENSG00000149305;ENSG00000152208;ENSG00000152822;ENSG00000153292;ENSG00000157404;ENSG00000158270;ENSG00000159961;ENSG00000162897;ENSG00000165621;ENSG00000166148;ENSG00000169006;ENSG00000171496;ENSG00000171505;ENSG00000173612;ENSG00000178568;ENSG00000180016;ENSG00000181609…
GO:0052866	phosphatidylinositol phosphate phosphatase activity	1	33	0.515089	0.748595	ENSG00000185133
GO:0004714	transmembrane receptor protein tyrosine kinase activity	3	126	0.516508	0.749231	ENSG00000145242;ENSG00000157404;ENSG00000178568
GO:0031369	translation initiation factor binding	1	34	0.525618	0.760273	ENSG00000131914
GO:0005546	phosphatidylinositol-4,5-bisphosphate binding	2	81	0.526863	0.760273	ENSG00000147697;ENSG00000265190
GO:0016616	oxidoreductase activity, acting on the CH-OH group of donors, NAD or NADP as acceptor	3	128	0.527109	0.760273	ENSG00000080511;ENSG00000198099;ENSG00000248144
GO:0016814	hydrolase activity, acting on carbon-nitrogen (but not peptide) bonds, in cyclic amidines	1	35	0.535919	0.771522	ENSG00000111701
GO:0048306	calcium-dependent protein binding	2	83	0.540018	0.775957	ENSG00000129991;ENSG00000143556
GO:0016229	steroid dehydrogenase activity	1	36	0.545998	0.780143	ENSG00000080511
GO:0016712	oxidoreductase activity, acting on paired donors, with incorporation or reduction of molecular oxygen, reduced flavin or flavoprotein as one donor, and incorporation of one atom of oxygen	1	36	0.545998	0.780143	ENSG00000140505
GO:0043394	proteoglycan binding	1	36	0.545998	0.780143	ENSG00000145147
GO:0030295	protein kinase activator activity	2	85	0.552917	0.788552	ENSG00000167244;ENSG00000196711
GO:0030246	carbohydrate binding	6	277	0.557952	0.794249	ENSG00000107518;ENSG00000158270;ENSG00000158764;ENSG00000164946;ENSG00000166509;ENSG00000185274
GO:0061980	regulatory RNA binding	1	38	0.565504	0.8035	ENSG00000131914
GO:0051219	phosphoprotein binding	2	88	0.571783	0.808197	ENSG00000035720;ENSG00000197943
GO:0016757	transferase activity, transferring glycosyl groups	6	281	0.571996	0.808197	ENSG00000101638;ENSG00000135454;ENSG00000177511;ENSG00000185274;ENSG00000242366;ENSG00000242515
GO:0005547	phosphatidylinositol-3,4,5-trisphosphate binding	1	39	0.574941	0.808197	ENSG00000265190
GO:0031492	nucleosomal DNA binding	1	39	0.574941	0.808197	ENSG00000187837
GO:0042169	SH2 domain binding	1	39	0.574941	0.808197	ENSG00000157404
GO:0030234	enzyme regulator activity	23	1085	0.575165	0.808197	ENSG00000044012;ENSG00000101074;ENSG00000101435;ENSG00000111701;ENSG00000113889;ENSG00000119698;ENSG00000124102;ENSG00000135824;ENSG00000137392;ENSG00000145087;ENSG00000145147;ENSG00000145879;ENSG00000147256;ENSG00000164266;ENSG00000167244;ENSG00000175121;ENSG00000178372;ENSG00000196711;ENSG00000196748;ENSG00000197641;ENSG00000204140;ENSG00000206075;ENSG00000242366
GO:0043177	organic acid binding	5	235	0.579056	0.812169	ENSG00000143320;ENSG00000166426;ENSG00000177511;ENSG00000223609;ENSG00000242366
GO:0016614	oxidoreductase activity, acting on CH-OH group of donors	3	139	0.583013	0.814854	ENSG00000080511;ENSG00000198099;ENSG00000248144
GO:0005504	fatty acid binding	1	40	0.584174	0.814854	ENSG00000242366
GO:0032451	demethylase activity	1	40	0.584174	0.814854	ENSG00000140505
GO:0019209	kinase activator activity	2	91	0.590065	0.820073	ENSG00000167244;ENSG00000196711
GO:0038024	cargo receptor activity	2	91	0.590065	0.820073	ENSG00000158270;ENSG00000184012
GO:0003730	mRNA 3'-UTR binding	2	93	0.601928	0.833684	ENSG00000107105;ENSG00000188120
GO:0008138	protein tyrosine/serine/threonine phosphatase activity	1	42	0.602044	0.833684	ENSG00000079393
GO:0004713	protein tyrosine kinase activity	3	144	0.606998	0.83902	ENSG00000145242;ENSG00000157404;ENSG00000178568
GO:0008092	cytoskeletal protein binding	21	1009	0.608569	0.839415	ENSG00000004939;ENSG00000041515;ENSG00000066032;ENSG00000095203;ENSG00000103546;ENSG00000112077;ENSG00000112530;ENSG00000129991;ENSG00000132677;ENSG00000140519;ENSG00000145087;ENSG00000146021;ENSG00000148935;ENSG00000154493;ENSG00000158022;ENSG00000159763;ENSG00000168297;ENSG00000170011;ENSG00000173641;ENSG00000173898;ENSG00000265190
GO:0030544	Hsp70 protein binding	1	43	0.61069	0.839415	ENSG00000112530
GO:0051879	Hsp90 protein binding	1	43	0.61069	0.839415	ENSG00000112530
GO:0001085	RNA polymerase II transcription factor binding	3	145	0.611684	0.839415	ENSG00000069011;ENSG00000107187;ENSG00000129152
GO:0003729	mRNA binding	6	297	0.625863	0.857331	ENSG00000104413;ENSG00000107105;ENSG00000111701;ENSG00000131914;ENSG00000188120;ENSG00000188425
GO:0032266	phosphatidylinositol-3-phosphate binding	1	45	0.627423	0.857928	ENSG00000188282
GO:0004553	hydrolase activity, hydrolyzing O-glycosyl compounds	2	98	0.630446	0.860344	ENSG00000141316;ENSG00000204099
GO:0001228	DNA-binding transcription activator activity, RNA polymerase II-specific	9	446	0.633131	0.860344	ENSG00000069011;ENSG00000107187;ENSG00000109101;ENSG00000115112;ENSG00000129152;ENSG00000135373;ENSG00000153266;ENSG00000168269;ENSG00000173253
GO:0019842	vitamin binding	3	150	0.634547	0.860344	ENSG00000143320;ENSG00000166426;ENSG00000198099
GO:0008227	G protein-coupled amine receptor activity	1	46	0.635518	0.860344	ENSG00000043591
GO:0004896	cytokine receptor activity	2	99	0.635956	0.860344	ENSG00000113302;ENSG00000125861
GO:0008135	translation factor activity, RNA binding	2	99	0.635956	0.860344	ENSG00000101210;ENSG00000175766
GO:0004984	olfactory receptor activity	8	399	0.63791	0.861461	ENSG00000159961;ENSG00000171496;ENSG00000171505;ENSG00000180016;ENSG00000181609;ENSG00000181616;ENSG00000183269;ENSG00000197674
GO:0005496	steroid binding	2	100	0.6414	0.862818	ENSG00000155066;ENSG00000242366
GO:1990782	protein tyrosine kinase binding	2	100	0.6414	0.862818	ENSG00000035720;ENSG00000196711
GO:0015026	coreceptor activity	1	47	0.643438	0.862818	ENSG00000254126
GO:0035591	signaling adaptor activity	1	47	0.643438	0.862818	ENSG00000035720
GO:0016758	transferase activity, transferring hexosyl groups	4	203	0.64459	0.862846	ENSG00000135454;ENSG00000185274;ENSG00000242366;ENSG00000242515
GO:0035254	glutamate receptor binding	1	48	0.651187	0.868628	ENSG00000075461
GO:0048020	CCR chemokine receptor binding	1	48	0.651187	0.868628	ENSG00000275385
GO:0031490	chromatin DNA binding	2	103	0.65735	0.872638	ENSG00000129152;ENSG00000187837
GO:0001102	RNA polymerase II activating transcription factor binding	1	49	0.658767	0.872638	ENSG00000129152
GO:0008009	chemokine activity	1	49	0.658767	0.872638	ENSG00000275385
GO:0098632	cell-cell adhesion mediator activity	1	49	0.658767	0.872638	ENSG00000186417
GO:0008374	O-acyltransferase activity	1	50	0.666183	0.878325	ENSG00000166391
GO:0015485	cholesterol binding	1	50	0.666183	0.878325	ENSG00000155066
GO:0004497	monooxygenase activity	2	105	0.667665	0.878325	ENSG00000140459;ENSG00000140505
GO:0004722	protein serine/threonine phosphatase activity	2	105	0.667665	0.878325	ENSG00000079393;ENSG00000175175
GO:0051018	protein kinase A binding	1	51	0.673439	0.884395	ENSG00000170011
GO:0030674	protein binding, bridging	3	162	0.685527	0.898724	ENSG00000035720;ENSG00000148935;ENSG00000175093
GO:0015179	L-amino acid transmembrane transporter activity	1	56	0.707422	0.922672	ENSG00000105143
GO:0043621	protein self-association	1	56	0.707422	0.922672	ENSG00000160472
GO:0051287	NAD binding	1	56	0.707422	0.922672	ENSG00000198099
GO:0042578	phosphoric ester hydrolase activity	7	377	0.712536	0.924857	ENSG00000066382;ENSG00000079393;ENSG00000154678;ENSG00000163283;ENSG00000175175;ENSG00000185133;ENSG00000197943
GO:0042803	protein homodimerization activity	13	679	0.715414	0.924857	ENSG00000004939;ENSG00000105388;ENSG00000129152;ENSG00000131910;ENSG00000140623;ENSG00000145147;ENSG00000151365;ENSG00000157404;ENSG00000162706;ENSG00000178568;ENSG00000179046;ENSG00000242366;ENSG00000242515
GO:0031406	carboxylic acid binding	4	223	0.71551	0.924857	ENSG00000143320;ENSG00000166426;ENSG00000177511;ENSG00000242366
GO:1902936	phosphatidylinositol bisphosphate binding	2	115	0.715517	0.924857	ENSG00000147697;ENSG00000265190
GO:0003743	translation initiation factor activity	1	58	0.720007	0.924857	ENSG00000175766
GO:0016836	hydro-lyase activity	1	58	0.720007	0.924857	ENSG00000133742
GO:0070063	RNA polymerase binding	1	58	0.720007	0.924857	ENSG00000111305
GO:0098631	cell adhesion mediator activity	1	58	0.720007	0.924857	ENSG00000186417
GO:1990841	promoter-specific chromatin binding	1	58	0.720007	0.924857	ENSG00000129152
GO:0032934	sterol binding	1	60	0.732051	0.938748	ENSG00000155066
GO:1901981	phosphatidylinositol phosphate binding	3	175	0.734561	0.940386	ENSG00000147697;ENSG00000188282;ENSG00000265190
GO:0016655	oxidoreductase activity, acting on NAD(P)H, quinone or similar compound as acceptor	1	61	0.737878	0.94305	ENSG00000198099
GO:0008047	enzyme activator activity	10	541	0.739467	0.943501	ENSG00000044012;ENSG00000111701;ENSG00000135824;ENSG00000137392;ENSG00000145087;ENSG00000147256;ENSG00000167244;ENSG00000196711;ENSG00000196748;ENSG00000204140
GO:0016301	kinase activity	15	793	0.742128	0.945315	ENSG00000077009;ENSG00000101349;ENSG00000131730;ENSG00000134398;ENSG00000138696;ENSG00000139144;ENSG00000145242;ENSG00000147613;ENSG00000157404;ENSG00000168297;ENSG00000178568;ENSG00000185988;ENSG00000196632;ENSG00000223572;ENSG00000237289
GO:0008028	monocarboxylic acid transmembrane transporter activity	1	62	0.743578	0.945584	ENSG00000118596
GO:0045182	translation regulator activity	1	64	0.754611	0.958017	ENSG00000188120
GO:0004521	endoribonuclease activity	1	65	0.759948	0.961593	ENSG00000134398
GO:0030145	manganese ion binding	1	65	0.759948	0.961593	ENSG00000066382
GO:0016810	hydrolase activity, acting on carbon-nitrogen (but not peptide) bonds	2	128	0.768954	0.971378	ENSG00000111701;ENSG00000142515
GO:0019001	guanyl nucleotide binding	7	402	0.771814	0.971772	ENSG00000066382;ENSG00000070729;ENSG00000101210;ENSG00000140623;ENSG00000152086;ENSG00000170289;ENSG00000176490
GO:0032561	guanyl ribonucleotide binding	7	402	0.771814	0.971772	ENSG00000066382;ENSG00000070729;ENSG00000101210;ENSG00000140623;ENSG00000152086;ENSG00000170289;ENSG00000176490
GO:0016788	hydrolase activity, acting on ester bonds	14	765	0.778551	0.97864	ENSG00000066382;ENSG00000079393;ENSG00000100078;ENSG00000100341;ENSG00000133742;ENSG00000134398;ENSG00000154678;ENSG00000159398;ENSG00000163283;ENSG00000168907;ENSG00000175175;ENSG00000185133;ENSG00000185269;ENSG00000197943
GO:0005518	collagen binding	1	70	0.784948	0.981828	ENSG00000183287
GO:0016811	hydrolase activity, acting on carbon-nitrogen (but not peptide) bonds, in linear amides	1	70	0.784948	0.981828	ENSG00000142515
GO:0031491	nucleosome binding	1	70	0.784948	0.981828	ENSG00000187837
GO:0008237	metallopeptidase activity	3	192	0.789348	0.984453	ENSG00000069206;ENSG00000104755;ENSG00000178031
GO:0048029	monosaccharide binding	1	71	0.789627	0.984453	ENSG00000158270
GO:0042379	chemokine receptor binding	1	72	0.794204	0.987157	ENSG00000275385
GO:0050839	cell adhesion molecule binding	9	518	0.794384	0.987157	ENSG00000066032;ENSG00000104755;ENSG00000154162;ENSG00000167244;ENSG00000171557;ENSG00000171560;ENSG00000171564;ENSG00000173898;ENSG00000197153
GO:0061630	ubiquitin protein ligase activity	5	306	0.796172	0.987772	ENSG00000105428;ENSG00000146755;ENSG00000154493;ENSG00000158022;ENSG00000179046
GO:0044877	protein-containing complex binding	24	1280	0.798729	0.989335	ENSG00000001626;ENSG00000041515;ENSG00000066032;ENSG00000070729;ENSG00000100362;ENSG00000104755;ENSG00000105642;ENSG00000109684;ENSG00000110680;ENSG00000111701;ENSG00000113302;ENSG00000116039;ENSG00000129991;ENSG00000131910;ENSG00000131914;ENSG00000148935;ENSG00000158270;ENSG00000159763;ENSG00000167244;ENSG00000169344;ENSG00000183287;ENSG00000186847;ENSG00000187837;ENSG00000265190
GO:0016798	hydrolase activity, acting on glycosyl bonds	2	137	0.800643	0.990098	ENSG00000141316;ENSG00000204099
GO:0016835	carbon-oxygen lyase activity	1	74	0.803064	0.99096	ENSG00000133742
GO:0008270	zinc ion binding	15	833	0.804463	0.99096	ENSG00000111701;ENSG00000113889;ENSG00000131914;ENSG00000133742;ENSG00000143556;ENSG00000146755;ENSG00000158022;ENSG00000163283;ENSG00000170011;ENSG00000171724;ENSG00000179046;ENSG00000183654;ENSG00000188425;ENSG00000198099;ENSG00000248144
GO:0001227	DNA-binding transcription repressor activity, RNA polymerase II-specific	5	310	0.805236	0.99096	ENSG00000004848;ENSG00000153266;ENSG00000163623;ENSG00000165556;ENSG00000178860
GO:0001618	virus receptor activity	1	76	0.811542	0.993508	ENSG00000204655
GO:0104005	hijacked molecular function	1	76	0.811542	0.993508	ENSG00000204655
GO:0042623	ATPase activity, coupled	5	314	0.813978	0.993508	ENSG00000001626;ENSG00000105929;ENSG00000143921;ENSG00000147614;ENSG00000151418
GO:0008022	protein C-terminus binding	3	201	0.81435	0.993508	ENSG00000148408;ENSG00000168297;ENSG00000173641
GO:0034987	immunoglobulin receptor binding	1	77	0.815644	0.993508	ENSG00000281179
GO:0004672	protein kinase activity	10	583	0.816043	0.993508	ENSG00000101349;ENSG00000134398;ENSG00000138696;ENSG00000145242;ENSG00000147613;ENSG00000157404;ENSG00000168297;ENSG00000178568;ENSG00000185988;ENSG00000196632
GO:0016773	phosphotransferase activity, alcohol group as acceptor	12	688	0.817322	0.993508	ENSG00000077009;ENSG00000101349;ENSG00000134398;ENSG00000138696;ENSG00000139144;ENSG00000145242;ENSG00000147613;ENSG00000157404;ENSG00000168297;ENSG00000178568;ENSG00000185988;ENSG00000196632
GO:0005516	calmodulin binding	3	203	0.819552	0.993508	ENSG00000105642;ENSG00000137766;ENSG00000154678
GO:0046332	SMAD binding	1	78	0.819657	0.993508	ENSG00000138696
GO:0061659	ubiquitin-like protein ligase activity	5	317	0.820328	0.993508	ENSG00000105428;ENSG00000146755;ENSG00000154493;ENSG00000158022;ENSG00000179046
GO:0060090	molecular adaptor activity	4	263	0.825051	0.997645	ENSG00000035720;ENSG00000140623;ENSG00000148935;ENSG00000175093
GO:0005178	integrin binding	2	146	0.828421	1	ENSG00000104755;ENSG00000167244
GO:0000981	DNA-binding transcription factor activity, RNA polymerase II-specific	25	1361	0.833063	1	ENSG00000004848;ENSG00000069011;ENSG00000107187;ENSG00000109101;ENSG00000112246;ENSG00000113430;ENSG00000115112;ENSG00000124664;ENSG00000129152;ENSG00000131668;ENSG00000131721;ENSG00000135373;ENSG00000136944;ENSG00000138136;ENSG00000139445;ENSG00000153266;ENSG00000163623;ENSG00000165556;ENSG00000168269;ENSG00000173253;ENSG00000178403;ENSG00000178860;ENSG00000180613;ENSG00000186766;ENSG00000187855
GO:0035257	nuclear hormone receptor binding	2	148	0.834102	1	ENSG00000129152;ENSG00000131910
GO:0016787	hydrolase activity	50	2593	0.835209	1	ENSG00000001626;ENSG00000041515;ENSG00000066382;ENSG00000069206;ENSG00000079393;ENSG00000087128;ENSG00000096088;ENSG00000100078;ENSG00000100341;ENSG00000101210;ENSG00000103269;ENSG00000104755;ENSG00000105141;ENSG00000105929;ENSG00000111701;ENSG00000116039;ENSG00000116176;ENSG00000133742;ENSG00000134398;ENSG00000140623;ENSG00000141316;ENSG00000142515;ENSG00000143839;ENSG00000143921;ENSG00000147614…
GO:0001540	amyloid-beta binding	1	83	0.838451	1	ENSG00000148408
GO:0033613	activating transcription factor binding	1	83	0.838451	1	ENSG00000129152
GO:0043021	ribonucleoprotein complex binding	2	150	0.839612	1	ENSG00000111701;ENSG00000131914
GO:0003700	DNA-binding transcription factor activity	26	1419	0.840974	1	ENSG00000004848;ENSG00000069011;ENSG00000107187;ENSG00000109101;ENSG00000112246;ENSG00000113430;ENSG00000115112;ENSG00000124664;ENSG00000129152;ENSG00000131668;ENSG00000131721;ENSG00000135373;ENSG00000136944;ENSG00000138136;ENSG00000139445;ENSG00000153266;ENSG00000163623;ENSG00000165556;ENSG00000168269;ENSG00000173253;ENSG00000178403;ENSG00000178860;ENSG00000180613;ENSG00000186766;ENSG00000187855…
GO:0019904	protein domain specific binding	12	706	0.842476	1	ENSG00000001626;ENSG00000043591;ENSG00000111319;ENSG00000111701;ENSG00000129991;ENSG00000131910;ENSG00000152208;ENSG00000157404;ENSG00000166828;ENSG00000185133;ENSG00000274618;ENSG00000275126
GO:0005126	cytokine receptor binding	4	274	0.848231	1	ENSG00000035720;ENSG00000113302;ENSG00000136487;ENSG00000275385
GO:0008013	beta-catenin binding	1	87	0.852069	1	ENSG00000066032
GO:0005506	iron ion binding	2	156	0.855164	1	ENSG00000140459;ENSG00000140505
GO:0019888	protein phosphatase regulator activity	1	91	0.864542	1	ENSG00000119698
GO:0016791	phosphatase activity	4	284	0.867004	1	ENSG00000079393;ENSG00000163283;ENSG00000175175;ENSG00000185133
GO:0019901	protein kinase binding	11	677	0.87225	1	ENSG00000035720;ENSG00000101210;ENSG00000129991;ENSG00000147689;ENSG00000166148;ENSG00000168143;ENSG00000169067;ENSG00000179046;ENSG00000196711;ENSG00000197943;ENSG00000242515
GO:0016705	oxidoreductase activity, acting on paired donors, with incorporation or reduction of molecular oxygen	2	165	0.875925	1	ENSG00000140459;ENSG00000140505
GO:0016407	acetyltransferase activity	1	96	0.878668	1	ENSG00000166391
GO:0016410	N-acyltransferase activity	1	96	0.878668	1	ENSG00000149926
GO:0005125	cytokine activity	3	235	0.887263	1	ENSG00000113302;ENSG00000183709;ENSG00000275385
GO:0003924	GTPase activity	4	300	0.892898	1	ENSG00000101210;ENSG00000140623;ENSG00000152086;ENSG00000176490
GO:0009055	electron transfer activity	1	103	0.89601	1	ENSG00000140505
GO:0005515	protein binding	311	14787	0.897605	1	ENSG00000001626;ENSG00000004848;ENSG00000004939;ENSG00000005108;ENSG00000007216;ENSG00000035720;ENSG00000041515;ENSG00000043591;ENSG00000044012;ENSG00000046774;ENSG00000066032;ENSG00000066382;ENSG00000068985;ENSG00000069011;ENSG00000070729;ENSG00000072041;ENSG00000075461;ENSG00000077009;ENSG00000079393;ENSG00000084674;ENSG00000086159;ENSG00000087128;ENSG00000095203;ENSG00000095713;ENSG00000099399…
GO:0004725	protein tyrosine phosphatase activity	1	104	0.898277	1	ENSG00000079393
GO:0016651	oxidoreductase activity, acting on NAD(P)H	1	104	0.898277	1	ENSG00000198099
GO:0042277	peptide binding	4	305	0.900032	1	ENSG00000128310;ENSG00000148408;ENSG00000166148;ENSG00000215644
GO:0019208	phosphatase regulator activity	1	106	0.902663	1	ENSG00000119698
GO:0030695	GTPase regulator activity	4	307	0.902767	1	ENSG00000135824;ENSG00000145087;ENSG00000145147;ENSG00000147256
GO:0004721	phosphoprotein phosphatase activity	2	185	0.912612	1	ENSG00000079393;ENSG00000175175
GO:0004540	ribonuclease activity	1	111	0.912822	1	ENSG00000134398
GO:0016746	transferase activity, transferring acyl groups	3	253	0.914464	1	ENSG00000149926;ENSG00000166391;ENSG00000167741
GO:0003714	transcription corepressor activity	2	187	0.915661	1	ENSG00000126752;ENSG00000131910
GO:0051082	unfolded protein binding	1	113	0.916583	1	ENSG00000134398
GO:0019887	protein kinase regulator activity	2	189	0.918611	1	ENSG00000167244;ENSG00000196711
GO:0043168	anion binding	53	2881	0.919434	1	ENSG00000001626;ENSG00000035720;ENSG00000041515;ENSG00000066382;ENSG00000070729;ENSG00000077009;ENSG00000084674;ENSG00000099822;ENSG00000101210;ENSG00000101349;ENSG00000102678;ENSG00000103528;ENSG00000105388;ENSG00000110975;ENSG00000113889;ENSG00000116039;ENSG00000131730;ENSG00000134398;ENSG00000137440;ENSG00000137766;ENSG00000138696;ENSG00000139144;ENSG00000140623;ENSG00000143320;ENSG00000143921…
GO:0042826	histone deacetylase binding	1	115	0.920182	1	ENSG00000198681
GO:0016772	transferase activity, transferring phosphorus-containing groups	15	946	0.921132	1	ENSG00000077009;ENSG00000101349;ENSG00000131730;ENSG00000134398;ENSG00000138696;ENSG00000139144;ENSG00000145242;ENSG00000147613;ENSG00000157404;ENSG00000168297;ENSG00000178568;ENSG00000185988;ENSG00000196632;ENSG00000223572;ENSG00000237289
GO:0003774	motor activity	1	116	0.921923	1	ENSG00000041515
GO:0008238	exopeptidase activity	1	116	0.921923	1	ENSG00000167741
GO:0032550	purine ribonucleoside binding	5	385	0.922914	1	ENSG00000066382;ENSG00000101210;ENSG00000140623;ENSG00000152086;ENSG00000176490
GO:0046914	transition metal ion binding	18	1112	0.924734	1	ENSG00000066382;ENSG00000111701;ENSG00000113889;ENSG00000131914;ENSG00000133742;ENSG00000140459;ENSG00000140505;ENSG00000143556;ENSG00000146755;ENSG00000158022;ENSG00000163283;ENSG00000170011;ENSG00000171724;ENSG00000179046;ENSG00000183654;ENSG00000188425;ENSG00000198099;ENSG00000248144
GO:0001883	purine nucleoside binding	5	388	0.925914	1	ENSG00000066382;ENSG00000101210;ENSG00000140623;ENSG00000152086;ENSG00000176490
GO:0032549	ribonucleoside binding	5	389	0.92689	1	ENSG00000066382;ENSG00000101210;ENSG00000140623;ENSG00000152086;ENSG00000176490
GO:0004197	cysteine-type endopeptidase activity	1	119	0.926921	1	ENSG00000105141
GO:0003697	single-stranded DNA binding	1	120	0.928516	1	ENSG00000165181
GO:0008234	cysteine-type peptidase activity	2	198	0.930723	1	ENSG00000105141;ENSG00000189401
GO:0001882	nucleoside binding	5	395	0.932515	1	ENSG00000066382;ENSG00000101210;ENSG00000140623;ENSG00000152086;ENSG00000176490
GO:0045296	cadherin binding	4	333	0.932743	1	ENSG00000066032;ENSG00000154162;ENSG00000173898;ENSG00000197153
GO:0004843	thiol-dependent ubiquitin-specific protease activity	1	123	0.933093	1	ENSG00000189401
GO:0036459	thiol-dependent ubiquitinyl hydrolase activity	1	123	0.933093	1	ENSG00000189401
GO:0101005	ubiquitinyl hydrolase activity	1	124	0.934553	1	ENSG00000189401
GO:0048037	cofactor binding	7	518	0.935064	1	ENSG00000140459;ENSG00000140505;ENSG00000165553;ENSG00000167210;ENSG00000167419;ENSG00000198099;ENSG00000223609
GO:0004519	endonuclease activity	1	125	0.935982	1	ENSG00000134398
GO:0016829	lyase activity	2	203	0.936696	1	ENSG00000133742;ENSG00000140505
GO:0031072	heat shock protein binding	1	127	0.938745	1	ENSG00000112530
GO:0005096	GTPase activator activity	3	276	0.940516	1	ENSG00000135824;ENSG00000145087;ENSG00000147256
GO:1990837	sequence-specific double-stranded DNA binding	26	1564	0.940869	1	ENSG00000004848;ENSG00000069011;ENSG00000107187;ENSG00000109101;ENSG00000112246;ENSG00000113430;ENSG00000115112;ENSG00000124664;ENSG00000129152;ENSG00000131668;ENSG00000131721;ENSG00000135373;ENSG00000136944;ENSG00000138136;ENSG00000139445;ENSG00000153266;ENSG00000163623;ENSG00000165556;ENSG00000168269;ENSG00000173253;ENSG00000178403;ENSG00000178568;ENSG00000178860;ENSG00000180613;ENSG00000186766…
GO:0017124	SH3 domain binding	1	129	0.94139	1	ENSG00000185133
GO:0019900	kinase binding	11	762	0.944284	1	ENSG00000035720;ENSG00000101210;ENSG00000129991;ENSG00000147689;ENSG00000166148;ENSG00000168143;ENSG00000169067;ENSG00000179046;ENSG00000196711;ENSG00000197943;ENSG00000242515
GO:0019783	ubiquitin-like protein-specific protease activity	1	132	0.945145	1	ENSG00000189401
GO:0140096	catalytic activity, acting on a protein	39	2246	0.945869	1	ENSG00000069206;ENSG00000079393;ENSG00000087128;ENSG00000096088;ENSG00000101349;ENSG00000103269;ENSG00000104755;ENSG00000105141;ENSG00000105428;ENSG00000116176;ENSG00000134398;ENSG00000138696;ENSG00000142515;ENSG00000143839;ENSG00000145242;ENSG00000146755;ENSG00000147613;ENSG00000154493;ENSG00000157404;ENSG00000158022;ENSG00000159763;ENSG00000167741;ENSG00000167748;ENSG00000167754;ENSG00000167757…
GO:0060589	nucleoside-triphosphatase regulator activity	4	350	0.947543	1	ENSG00000135824;ENSG00000145087;ENSG00000145147;ENSG00000147256
GO:0005085	guanyl-nucleotide exchange factor activity	2	216	0.950024	1	ENSG00000043591;ENSG00000165694
GO:0044325	ion channel binding	1	138	0.951951	1	ENSG00000162763
GO:0019207	kinase regulator activity	2	219	0.952696	1	ENSG00000167244;ENSG00000196711
GO:0000287	magnesium ion binding	2	221	0.954401	1	ENSG00000134398;ENSG00000163283
GO:0019838	growth factor binding	1	141	0.955031	1	ENSG00000137440
GO:0016747	transferase activity, transferring acyl groups other than amino-acyl groups	2	222	0.955232	1	ENSG00000149926;ENSG00000166391
GO:0003690	double-stranded DNA binding	27	1657	0.956658	1	ENSG00000004848;ENSG00000069011;ENSG00000107187;ENSG00000109101;ENSG00000112246;ENSG00000113430;ENSG00000115112;ENSG00000124664;ENSG00000129152;ENSG00000131668;ENSG00000131721;ENSG00000135373;ENSG00000136944;ENSG00000138136;ENSG00000139445;ENSG00000153266;ENSG00000163623;ENSG00000165556;ENSG00000168269;ENSG00000173253;ENSG00000178403;ENSG00000178568;ENSG00000178860;ENSG00000180613;ENSG00000186766…
GO:0097367	carbohydrate derivative binding	39	2280	0.956911	1	ENSG00000001626;ENSG00000041515;ENSG00000066382;ENSG00000070729;ENSG00000077009;ENSG00000084674;ENSG00000099822;ENSG00000101210;ENSG00000101349;ENSG00000102678;ENSG00000105388;ENSG00000113889;ENSG00000116039;ENSG00000131730;ENSG00000134398;ENSG00000137440;ENSG00000138696;ENSG00000139144;ENSG00000140623;ENSG00000143921;ENSG00000145147;ENSG00000145242;ENSG00000147613;ENSG00000148408;ENSG00000152086…
GO:0031625	ubiquitin protein ligase binding	3	298	0.958381	1	ENSG00000046774;ENSG00000112530;ENSG00000129152
GO:0032559	adenyl ribonucleotide binding	25	1562	0.960199	1	ENSG00000001626;ENSG00000041515;ENSG00000066382;ENSG00000070729;ENSG00000077009;ENSG00000099822;ENSG00000101349;ENSG00000116039;ENSG00000131730;ENSG00000134398;ENSG00000138696;ENSG00000139144;ENSG00000143921;ENSG00000145242;ENSG00000147613;ENSG00000148408;ENSG00000157404;ENSG00000168297;ENSG00000169067;ENSG00000178568;ENSG00000185988;ENSG00000196228;ENSG00000196632;ENSG00000223572;ENSG00000237289
GO:0033218	amide binding	4	369	0.96052	1	ENSG00000128310;ENSG00000148408;ENSG00000166148;ENSG00000215644
GO:0004842	ubiquitin-protein transferase activity	5	435	0.961103	1	ENSG00000105428;ENSG00000146755;ENSG00000154493;ENSG00000158022;ENSG00000179046
GO:0004674	protein serine/threonine kinase activity	5	436	0.961649	1	ENSG00000101349;ENSG00000134398;ENSG00000138696;ENSG00000147613;ENSG00000196632
GO:0030554	adenyl nucleotide binding	25	1575	0.964207	1	ENSG00000001626;ENSG00000041515;ENSG00000066382;ENSG00000070729;ENSG00000077009;ENSG00000099822;ENSG00000101349;ENSG00000116039;ENSG00000131730;ENSG00000134398;ENSG00000138696;ENSG00000139144;ENSG00000143921;ENSG00000145242;ENSG00000147613;ENSG00000148408;ENSG00000157404;ENSG00000168297;ENSG00000169067;ENSG00000178568;ENSG00000185988;ENSG00000196228;ENSG00000196632;ENSG00000223572;ENSG00000237289
GO:0019903	protein phosphatase binding	1	153	0.965503	1	ENSG00000041515
GO:0005525	GTP binding	4	381	0.967115	1	ENSG00000101210;ENSG00000140623;ENSG00000152086;ENSG00000176490
GO:0015631	tubulin binding	4	381	0.967115	1	ENSG00000103546;ENSG00000112530;ENSG00000148935;ENSG00000154493
GO:0003682	chromatin binding	7	573	0.967246	1	ENSG00000004848;ENSG00000077080;ENSG00000129152;ENSG00000139445;ENSG00000153266;ENSG00000163623;ENSG00000187837
GO:0003823	antigen binding	1	156	0.967716	1	ENSG00000281179
GO:0016887	ATPase activity	6	512	0.967766	1	ENSG00000001626;ENSG00000105929;ENSG00000143921;ENSG00000147614;ENSG00000151418;ENSG00000165181
GO:0044389	ubiquitin-like protein ligase binding	3	316	0.969122	1	ENSG00000046774;ENSG00000112530;ENSG00000129152
GO:0140030	modification-dependent protein binding	1	160	0.970448	1	ENSG00000197943
GO:0000976	transcription regulatory region sequence-specific DNA binding	23	1496	0.971864	1	ENSG00000004848;ENSG00000069011;ENSG00000107187;ENSG00000109101;ENSG00000112246;ENSG00000113430;ENSG00000115112;ENSG00000129152;ENSG00000131668;ENSG00000131721;ENSG00000135373;ENSG00000136944;ENSG00000139445;ENSG00000153266;ENSG00000163623;ENSG00000165556;ENSG00000168269;ENSG00000173253;ENSG00000178403;ENSG00000178568;ENSG00000178860;ENSG00000186766;ENSG00000187855
GO:0019787	ubiquitin-like protein transferase activity	5	458	0.972019	1	ENSG00000105428;ENSG00000146755;ENSG00000154493;ENSG00000158022;ENSG00000179046
GO:0044212	transcription regulatory region DNA binding	23	1499	0.972593	1	ENSG00000004848;ENSG00000069011;ENSG00000107187;ENSG00000109101;ENSG00000112246;ENSG00000113430;ENSG00000115112;ENSG00000129152;ENSG00000131668;ENSG00000131721;ENSG00000135373;ENSG00000136944;ENSG00000139445;ENSG00000153266;ENSG00000163623;ENSG00000165556;ENSG00000168269;ENSG00000173253;ENSG00000178403;ENSG00000178568;ENSG00000178860;ENSG00000186766;ENSG00000187855
GO:0001067	regulatory region nucleic acid binding	23	1501	0.97307	1	ENSG00000004848;ENSG00000069011;ENSG00000107187;ENSG00000109101;ENSG00000112246;ENSG00000113430;ENSG00000115112;ENSG00000129152;ENSG00000131668;ENSG00000131721;ENSG00000135373;ENSG00000136944;ENSG00000139445;ENSG00000153266;ENSG00000163623;ENSG00000165556;ENSG00000168269;ENSG00000173253;ENSG00000178403;ENSG00000178568;ENSG00000178860;ENSG00000186766;ENSG00000187855
GO:0043565	sequence-specific DNA binding	26	1665	0.973601	1	ENSG00000004848;ENSG00000069011;ENSG00000107187;ENSG00000109101;ENSG00000112246;ENSG00000113430;ENSG00000115112;ENSG00000124664;ENSG00000129152;ENSG00000131668;ENSG00000131721;ENSG00000135373;ENSG00000136944;ENSG00000138136;ENSG00000139445;ENSG00000153266;ENSG00000163623;ENSG00000165556;ENSG00000168269;ENSG00000173253;ENSG00000178403;ENSG00000178568;ENSG00000178860;ENSG00000180613;ENSG00000186766…
GO:0016491	oxidoreductase activity	10	772	0.97371	1	ENSG00000080511;ENSG00000132746;ENSG00000140459;ENSG00000140505;ENSG00000167210;ENSG00000167419;ENSG00000171724;ENSG00000198099;ENSG00000223609;ENSG00000248144
GO:0016853	isomerase activity	1	171	0.976829	1	ENSG00000001626
GO:0017111	nucleoside-triphosphatase activity	11	854	0.97981	1	ENSG00000001626;ENSG00000041515;ENSG00000101210;ENSG00000105929;ENSG00000140623;ENSG00000143921;ENSG00000147614;ENSG00000151418;ENSG00000152086;ENSG00000165181;ENSG00000176490
GO:0032555	purine ribonucleotide binding	30	1915	0.980478	1	ENSG00000001626;ENSG00000041515;ENSG00000066382;ENSG00000070729;ENSG00000077009;ENSG00000099822;ENSG00000101210;ENSG00000101349;ENSG00000116039;ENSG00000131730;ENSG00000134398;ENSG00000138696;ENSG00000139144;ENSG00000140623;ENSG00000143921;ENSG00000145242;ENSG00000147613;ENSG00000148408;ENSG00000152086;ENSG00000157404;ENSG00000168297;ENSG00000169067;ENSG00000170289;ENSG00000176490;ENSG00000178568…
GO:0008017	microtubule binding	2	273	0.98278	1	ENSG00000148935;ENSG00000154493
GO:0017076	purine nucleotide binding	30	1930	0.982784	1	ENSG00000001626;ENSG00000041515;ENSG00000066382;ENSG00000070729;ENSG00000077009;ENSG00000099822;ENSG00000101210;ENSG00000101349;ENSG00000116039;ENSG00000131730;ENSG00000134398;ENSG00000138696;ENSG00000139144;ENSG00000140623;ENSG00000143921;ENSG00000145242;ENSG00000147613;ENSG00000148408;ENSG00000152086;ENSG00000157404;ENSG00000168297;ENSG00000169067;ENSG00000170289;ENSG00000176490;ENSG00000178568…
GO:0032553	ribonucleotide binding	30	1932	0.983073	1	ENSG00000001626;ENSG00000041515;ENSG00000066382;ENSG00000070729;ENSG00000077009;ENSG00000099822;ENSG00000101210;ENSG00000101349;ENSG00000116039;ENSG00000131730;ENSG00000134398;ENSG00000138696;ENSG00000139144;ENSG00000140623;ENSG00000143921;ENSG00000145242;ENSG00000147613;ENSG00000148408;ENSG00000152086;ENSG00000157404;ENSG00000168297;ENSG00000169067;ENSG00000170289;ENSG00000176490;ENSG00000178568…
GO:0008144	drug binding	26	1724	0.98419	1	ENSG00000001626;ENSG00000041515;ENSG00000066382;ENSG00000077009;ENSG00000101349;ENSG00000116039;ENSG00000131730;ENSG00000134398;ENSG00000138696;ENSG00000139144;ENSG00000143921;ENSG00000145242;ENSG00000147613;ENSG00000148408;ENSG00000157404;ENSG00000165553;ENSG00000168297;ENSG00000169067;ENSG00000178568;ENSG00000185988;ENSG00000196632;ENSG00000198099;ENSG00000223572;ENSG00000223609;ENSG00000237289…
GO:0000977	RNA polymerase II regulatory region sequence-specific DNA binding	20	1401	0.985315	1	ENSG00000004848;ENSG00000069011;ENSG00000107187;ENSG00000112246;ENSG00000113430;ENSG00000115112;ENSG00000129152;ENSG00000131668;ENSG00000131721;ENSG00000135373;ENSG00000136944;ENSG00000153266;ENSG00000163623;ENSG00000165556;ENSG00000168269;ENSG00000173253;ENSG00000178403;ENSG00000178860;ENSG00000186766;ENSG00000187855
GO:0001012	RNA polymerase II regulatory region DNA binding	20	1401	0.985315	1	ENSG00000004848;ENSG00000069011;ENSG00000107187;ENSG00000112246;ENSG00000113430;ENSG00000115112;ENSG00000129152;ENSG00000131668;ENSG00000131721;ENSG00000135373;ENSG00000136944;ENSG00000153266;ENSG00000163623;ENSG00000165556;ENSG00000168269;ENSG00000173253;ENSG00000178403;ENSG00000178860;ENSG00000186766;ENSG00000187855
GO:0019902	phosphatase binding	1	199	0.987534	1	ENSG00000041515
GO:0000987	proximal promoter sequence-specific DNA binding	16	1199	0.988729	1	ENSG00000004848;ENSG00000069011;ENSG00000107187;ENSG00000113430;ENSG00000115112;ENSG00000129152;ENSG00000135373;ENSG00000139445;ENSG00000153266;ENSG00000163623;ENSG00000165556;ENSG00000168269;ENSG00000173253;ENSG00000178403;ENSG00000178860;ENSG00000186766
GO:0004518	nuclease activity	1	207	0.989559	1	ENSG00000134398
GO:0016462	pyrophosphatase activity	11	912	0.989919	1	ENSG00000001626;ENSG00000041515;ENSG00000101210;ENSG00000105929;ENSG00000140623;ENSG00000143921;ENSG00000147614;ENSG00000151418;ENSG00000152086;ENSG00000165181;ENSG00000176490
GO:0016817	hydrolase activity, acting on acid anhydrides	11	914	0.990164	1	ENSG00000001626;ENSG00000041515;ENSG00000101210;ENSG00000105929;ENSG00000140623;ENSG00000143921;ENSG00000147614;ENSG00000151418;ENSG00000152086;ENSG00000165181;ENSG00000176490
GO:0016818	hydrolase activity, acting on acid anhydrides, in phosphorus-containing anhydrides	11	914	0.990164	1	ENSG00000001626;ENSG00000041515;ENSG00000101210;ENSG00000105929;ENSG00000140623;ENSG00000143921;ENSG00000147614;ENSG00000151418;ENSG00000152086;ENSG00000165181;ENSG00000176490
GO:0005524	ATP binding	21	1500	0.990408	1	ENSG00000001626;ENSG00000041515;ENSG00000077009;ENSG00000101349;ENSG00000116039;ENSG00000131730;ENSG00000134398;ENSG00000138696;ENSG00000139144;ENSG00000143921;ENSG00000145242;ENSG00000147613;ENSG00000148408;ENSG00000157404;ENSG00000168297;ENSG00000169067;ENSG00000178568;ENSG00000185988;ENSG00000196632;ENSG00000223572;ENSG00000237289
GO:0140110	transcription regulator activity	29	1951	0.991094	1	ENSG00000004848;ENSG00000069011;ENSG00000077080;ENSG00000107187;ENSG00000109101;ENSG00000112246;ENSG00000113430;ENSG00000115112;ENSG00000124664;ENSG00000126752;ENSG00000129152;ENSG00000131668;ENSG00000131721;ENSG00000131910;ENSG00000135373;ENSG00000136944;ENSG00000138136;ENSG00000139445;ENSG00000153266;ENSG00000163623;ENSG00000165556;ENSG00000168269;ENSG00000173253;ENSG00000178403;ENSG00000178860…
GO:0036094	small molecule binding	41	2594	0.991101	1	ENSG00000001626;ENSG00000041515;ENSG00000066382;ENSG00000070729;ENSG00000077009;ENSG00000099822;ENSG00000101210;ENSG00000101349;ENSG00000116039;ENSG00000131730;ENSG00000134398;ENSG00000138696;ENSG00000139144;ENSG00000140623;ENSG00000143320;ENSG00000143921;ENSG00000145242;ENSG00000147613;ENSG00000148408;ENSG00000152086;ENSG00000155066;ENSG00000157404;ENSG00000158270;ENSG00000165553;ENSG00000165556…
GO:0000978	RNA polymerase II proximal promoter sequence-specific DNA binding	15	1184	0.993073	1	ENSG00000004848;ENSG00000069011;ENSG00000107187;ENSG00000113430;ENSG00000115112;ENSG00000129152;ENSG00000135373;ENSG00000153266;ENSG00000163623;ENSG00000165556;ENSG00000168269;ENSG00000173253;ENSG00000178403;ENSG00000178860;ENSG00000186766
GO:0000166	nucleotide binding	32	2175	0.994881	1	ENSG00000001626;ENSG00000041515;ENSG00000066382;ENSG00000070729;ENSG00000077009;ENSG00000099822;ENSG00000101210;ENSG00000101349;ENSG00000116039;ENSG00000131730;ENSG00000134398;ENSG00000138696;ENSG00000139144;ENSG00000140623;ENSG00000143921;ENSG00000145242;ENSG00000147613;ENSG00000148408;ENSG00000152086;ENSG00000157404;ENSG00000165556;ENSG00000168297;ENSG00000169067;ENSG00000170289;ENSG00000176490…
GO:1901265	nucleoside phosphate binding	32	2176	0.994929	1	ENSG00000001626;ENSG00000041515;ENSG00000066382;ENSG00000070729;ENSG00000077009;ENSG00000099822;ENSG00000101210;ENSG00000101349;ENSG00000116039;ENSG00000131730;ENSG00000134398;ENSG00000138696;ENSG00000139144;ENSG00000140623;ENSG00000143921;ENSG00000145242;ENSG00000147613;ENSG00000148408;ENSG00000152086;ENSG00000157404;ENSG00000165556;ENSG00000168297;ENSG00000169067;ENSG00000170289;ENSG00000176490…
GO:0019899	enzyme binding	32	2204	0.9961	1	ENSG00000001626;ENSG00000035720;ENSG00000041515;ENSG00000043591;ENSG00000046774;ENSG00000084674;ENSG00000101210;ENSG00000105929;ENSG00000111305;ENSG00000112530;ENSG00000129152;ENSG00000129991;ENSG00000140505;ENSG00000147689;ENSG00000151418;ENSG00000157404;ENSG00000165694;ENSG00000166148;ENSG00000168143;ENSG00000168785;ENSG00000169067;ENSG00000170011;ENSG00000174502;ENSG00000179046;ENSG00000183287…
GO:0042802	identical protein binding	29	2063	0.996941	1	ENSG00000004939;ENSG00000099822;ENSG00000100362;ENSG00000105388;ENSG00000110680;ENSG00000113302;ENSG00000118271;ENSG00000125363;ENSG00000129152;ENSG00000131910;ENSG00000140519;ENSG00000140623;ENSG00000145147;ENSG00000146755;ENSG00000147689;ENSG00000151365;ENSG00000152822;ENSG00000157404;ENSG00000159763;ENSG00000162706;ENSG00000170419;ENSG00000171557;ENSG00000177511;ENSG00000178568;ENSG00000179046…
GO:0031267	small GTPase binding	1	263	0.996988	1	ENSG00000170011
GO:0035639	purine ribonucleoside triphosphate binding	25	1846	0.997186	1	ENSG00000001626;ENSG00000041515;ENSG00000077009;ENSG00000101210;ENSG00000101349;ENSG00000116039;ENSG00000131730;ENSG00000134398;ENSG00000138696;ENSG00000139144;ENSG00000140623;ENSG00000143921;ENSG00000145242;ENSG00000147613;ENSG00000148408;ENSG00000152086;ENSG00000157404;ENSG00000168297;ENSG00000169067;ENSG00000176490;ENSG00000178568;ENSG00000185988;ENSG00000196632;ENSG00000223572;ENSG00000237289
GO:0051020	GTPase binding	3	471	0.998021	1	ENSG00000043591;ENSG00000165694;ENSG00000170011
GO:0003713	transcription coactivator activity	1	282	0.998026	1	ENSG00000077080
GO:0050662	coenzyme binding	1	297	0.998587	1	ENSG00000198099
GO:0005488	binding	348	16838	0.998601	1	ENSG00000001626;ENSG00000004848;ENSG00000004939;ENSG00000005108;ENSG00000007216;ENSG00000035720;ENSG00000041515;ENSG00000043591;ENSG00000044012;ENSG00000046774;ENSG00000055732;ENSG00000066032;ENSG00000066382;ENSG00000068985;ENSG00000069011;ENSG00000070729;ENSG00000072041;ENSG00000075461;ENSG00000077009;ENSG00000077080;ENSG00000079393;ENSG00000084674;ENSG00000086159;ENSG00000087128;ENSG00000095203…
GO:0003712	transcription coregulator activity	3	508	0.999009	1	ENSG00000077080;ENSG00000126752;ENSG00000131910
GO:0016740	transferase activity	32	2342	0.999012	1	ENSG00000077009;ENSG00000101349;ENSG00000101638;ENSG00000105428;ENSG00000131730;ENSG00000134398;ENSG00000135454;ENSG00000138696;ENSG00000139144;ENSG00000145242;ENSG00000146755;ENSG00000147613;ENSG00000149926;ENSG00000154493;ENSG00000157404;ENSG00000158022;ENSG00000166391;ENSG00000167741;ENSG00000168297;ENSG00000177511;ENSG00000178568;ENSG00000179046;ENSG00000183654;ENSG00000185274;ENSG00000185352…
GO:0003677	DNA binding	34	2487	0.999297	1	ENSG00000004848;ENSG00000069011;ENSG00000107187;ENSG00000109101;ENSG00000112246;ENSG00000113430;ENSG00000115112;ENSG00000124664;ENSG00000129152;ENSG00000131668;ENSG00000131721;ENSG00000135373;ENSG00000136944;ENSG00000138136;ENSG00000139445;ENSG00000153266;ENSG00000163623;ENSG00000165181;ENSG00000165556;ENSG00000168269;ENSG00000173253;ENSG00000178403;ENSG00000178568;ENSG00000178860;ENSG00000180613…
GO:0046872	metal ion binding	66	4265	0.999592	1	ENSG00000066382;ENSG00000077009;ENSG00000095713;ENSG00000100078;ENSG00000100362;ENSG00000103528;ENSG00000103546;ENSG00000105143;ENSG00000105428;ENSG00000107187;ENSG00000110975;ENSG00000111701;ENSG00000113889;ENSG00000129991;ENSG00000131914;ENSG00000133742;ENSG00000134398;ENSG00000134757;ENSG00000136944;ENSG00000137766;ENSG00000138696;ENSG00000140459;ENSG00000140505;ENSG00000141750;ENSG00000142449…
GO:0008134	transcription factor binding	4	669	0.99976	1	ENSG00000069011;ENSG00000107187;ENSG00000129152;ENSG00000131910
GO:0043169	cation binding	66	4349	0.999812	1	ENSG00000066382;ENSG00000077009;ENSG00000095713;ENSG00000100078;ENSG00000100362;ENSG00000103528;ENSG00000103546;ENSG00000105143;ENSG00000105428;ENSG00000107187;ENSG00000110975;ENSG00000111701;ENSG00000113889;ENSG00000129991;ENSG00000131914;ENSG00000133742;ENSG00000134398;ENSG00000134757;ENSG00000136944;ENSG00000137766;ENSG00000138696;ENSG00000140459;ENSG00000140505;ENSG00000141750;ENSG00000142449…
GO:0140098	catalytic activity, acting on RNA	1	392	0.999831	1	ENSG00000134398
GO:0043167	ion binding	102	6344	0.999956	1	ENSG00000001626;ENSG00000035720;ENSG00000041515;ENSG00000066382;ENSG00000070729;ENSG00000077009;ENSG00000084674;ENSG00000095713;ENSG00000099822;ENSG00000100078;ENSG00000100362;ENSG00000101210;ENSG00000101349;ENSG00000102678;ENSG00000103528;ENSG00000103546;ENSG00000105143;ENSG00000105388;ENSG00000105428;ENSG00000107187;ENSG00000110975;ENSG00000111701;ENSG00000113889;ENSG00000116039;ENSG00000129991…
GO:0003824	catalytic activity	91	5857	0.999977	1	ENSG00000001626;ENSG00000041515;ENSG00000066382;ENSG00000069206;ENSG00000077009;ENSG00000079393;ENSG00000080511;ENSG00000087128;ENSG00000096088;ENSG00000100078;ENSG00000100341;ENSG00000101210;ENSG00000101349;ENSG00000101638;ENSG00000103269;ENSG00000104755;ENSG00000105141;ENSG00000105428;ENSG00000105929;ENSG00000111701;ENSG00000116039;ENSG00000116176;ENSG00000131730;ENSG00000132746;ENSG00000133742…
GO:0003723	RNA binding	13	1695	0.999999	1	ENSG00000101210;ENSG00000104112;ENSG00000104413;ENSG00000107105;ENSG00000111701;ENSG00000131914;ENSG00000175766;ENSG00000187837;ENSG00000188120;ENSG00000188425;ENSG00000204010;ENSG00000274618;ENSG00000275126
GO:0097159	organic cyclic compound binding	81	6034	1	1	ENSG00000001626;ENSG00000004848;ENSG00000041515;ENSG00000066382;ENSG00000069011;ENSG00000070729;ENSG00000077009;ENSG00000099822;ENSG00000101210;ENSG00000101349;ENSG00000104112;ENSG00000104413;ENSG00000107105;ENSG00000107187;ENSG00000109101;ENSG00000111701;ENSG00000112246;ENSG00000113430;ENSG00000115112;ENSG00000116039;ENSG00000124664;ENSG00000129152;ENSG00000131668;ENSG00000131721;ENSG00000131730…
GO:0003676	nucleic acid binding	44	3997	1	1	ENSG00000004848;ENSG00000069011;ENSG00000101210;ENSG00000104112;ENSG00000104413;ENSG00000107105;ENSG00000107187;ENSG00000109101;ENSG00000111701;ENSG00000112246;ENSG00000113430;ENSG00000115112;ENSG00000124664;ENSG00000129152;ENSG00000131668;ENSG00000131721;ENSG00000131914;ENSG00000135373;ENSG00000136944;ENSG00000138136;ENSG00000139445;ENSG00000153266;ENSG00000163623;ENSG00000165181;ENSG00000165556…
GO:1901363	heterocyclic compound binding	79	5953	1	1	ENSG00000001626;ENSG00000004848;ENSG00000041515;ENSG00000066382;ENSG00000069011;ENSG00000070729;ENSG00000077009;ENSG00000099822;ENSG00000101210;ENSG00000101349;ENSG00000104112;ENSG00000104413;ENSG00000107105;ENSG00000107187;ENSG00000109101;ENSG00000111701;ENSG00000112246;ENSG00000113430;ENSG00000115112;ENSG00000116039;ENSG00000124664;ENSG00000129152;ENSG00000131668;ENSG00000131721;ENSG00000131730…
GO:0003674	molecular_function	399	18408	1	1	ENSG00000001626;ENSG00000004848;ENSG00000004939;ENSG00000005108;ENSG00000007216;ENSG00000035720;ENSG00000041515;ENSG00000043591;ENSG00000044012;ENSG00000046774;ENSG00000055732;ENSG00000066032;ENSG00000066382;ENSG00000068985;ENSG00000069011;ENSG00000069206;ENSG00000070729;ENSG00000072041;ENSG00000073150;ENSG00000075461;ENSG00000077009;ENSG00000077080;ENSG00000079393;ENSG00000080511;ENSG00000084674…
