# Supplementary material for: High Expression of JMJD4 Is a Potential Diagnostic and Prognostic Marker of Renal Cell Carcinoma
Source: Dis Markers. 2021 Dec 24;2021:9573540. doi: 10.1155/2021/9573540 (PMC8720244; doi:10.1155/2021/9573540)
Supplement: Supplementary 4 — Supplemental material 4: details of the enriched genes in cellular component of GO analysis. [file 9573540.f4.xlsx]

## Sheet: out.C
GO ID	Description	out (407)	All (18579)	pvalue	p.adjust	Genes
GO:0045095	keratin filament	16	98	3.86003e-10	1.96861e-07	ENSG00000105141;ENSG00000135480;ENSG00000170423;ENSG00000170454;ENSG00000170465;ENSG00000170477;ENSG00000185479;ENSG00000186081;ENSG00000186847;ENSG00000188581;ENSG00000189169;ENSG00000189182;ENSG00000196224;ENSG00000205420;ENSG00000212724;ENSG00000241233
GO:0005576	extracellular region	145	4324	8.75891e-09	2.23352e-06	ENSG00000004939;ENSG00000005108;ENSG00000007216;ENSG00000044012;ENSG00000084674;ENSG00000087128;ENSG00000095713;ENSG00000096088;ENSG00000100078;ENSG00000101074;ENSG00000101435;ENSG00000101440;ENSG00000102678;ENSG00000104112;ENSG00000104918;ENSG00000105388;ENSG00000105929;ENSG00000107518;ENSG00000109205;ENSG00000110484;ENSG00000110680;ENSG00000111319;ENSG00000113302;ENSG00000113805;ENSG00000113889…
GO:0005882	intermediate filament	20	219	8.14066e-08	1.38391e-05	ENSG00000105141;ENSG00000131737;ENSG00000135480;ENSG00000170423;ENSG00000170454;ENSG00000170465;ENSG00000170477;ENSG00000171346;ENSG00000185479;ENSG00000186081;ENSG00000186832;ENSG00000186847;ENSG00000188581;ENSG00000189169;ENSG00000189182;ENSG00000196224;ENSG00000204897;ENSG00000205420;ENSG00000212724;ENSG00000241233
GO:0045111	intermediate filament cytoskeleton	21	260	3.10821e-07	3.96296e-05	ENSG00000105141;ENSG00000105143;ENSG00000131737;ENSG00000135480;ENSG00000170423;ENSG00000170454;ENSG00000170465;ENSG00000170477;ENSG00000171346;ENSG00000185479;ENSG00000186081;ENSG00000186832;ENSG00000186847;ENSG00000188581;ENSG00000189169;ENSG00000189182;ENSG00000196224;ENSG00000204897;ENSG00000205420;ENSG00000212724;ENSG00000241233
GO:0044421	extracellular region part	115	3570	5.18704e-06	0.000529078	ENSG00000004939;ENSG00000007216;ENSG00000044012;ENSG00000084674;ENSG00000095713;ENSG00000096088;ENSG00000100078;ENSG00000101074;ENSG00000101435;ENSG00000101440;ENSG00000102678;ENSG00000104918;ENSG00000105388;ENSG00000105929;ENSG00000107518;ENSG00000109205;ENSG00000110484;ENSG00000110680;ENSG00000111319;ENSG00000113302;ENSG00000113889;ENSG00000116039;ENSG00000116176;ENSG00000116194;ENSG00000118271…
GO:0005615	extracellular space	108	3339	9.53208e-06	0.000810227	ENSG00000004939;ENSG00000007216;ENSG00000044012;ENSG00000084674;ENSG00000095713;ENSG00000096088;ENSG00000100078;ENSG00000101074;ENSG00000101435;ENSG00000101440;ENSG00000102678;ENSG00000104918;ENSG00000105388;ENSG00000105929;ENSG00000109205;ENSG00000110484;ENSG00000110680;ENSG00000111319;ENSG00000113302;ENSG00000113889;ENSG00000116039;ENSG00000116176;ENSG00000116194;ENSG00000118271;ENSG00000123843…
GO:0001533	cornified envelope	7	44	4.37705e-05	0.003189	ENSG00000124102;ENSG00000134757;ENSG00000163207;ENSG00000163209;ENSG00000169469;ENSG00000169474;ENSG00000203785
GO:0071944	cell periphery	160	5694	0.000105948	0.0067542	ENSG00000001626;ENSG00000004939;ENSG00000005108;ENSG00000007216;ENSG00000041515;ENSG00000043591;ENSG00000055732;ENSG00000066032;ENSG00000069206;ENSG00000070729;ENSG00000072041;ENSG00000073150;ENSG00000075461;ENSG00000077009;ENSG00000080511;ENSG00000084674;ENSG00000086159;ENSG00000087128;ENSG00000095203;ENSG00000099822;ENSG00000100078;ENSG00000100362;ENSG00000102239;ENSG00000103269;ENSG00000103528…
GO:0005886	plasma membrane	156	5569	0.000164373	0.00931447	ENSG00000001626;ENSG00000004939;ENSG00000005108;ENSG00000007216;ENSG00000041515;ENSG00000043591;ENSG00000055732;ENSG00000066032;ENSG00000069206;ENSG00000070729;ENSG00000072041;ENSG00000073150;ENSG00000075461;ENSG00000077009;ENSG00000080511;ENSG00000084674;ENSG00000086159;ENSG00000087128;ENSG00000095203;ENSG00000099822;ENSG00000100078;ENSG00000102239;ENSG00000103269;ENSG00000103528;ENSG00000103546…
GO:0005577	fibrinogen complex	3	8	0.000538433	0.0267851	ENSG00000171557;ENSG00000171560;ENSG00000171564
GO:0045177	apical part of cell	21	431	0.000577718	0.0267851	ENSG00000001626;ENSG00000086159;ENSG00000095203;ENSG00000105388;ENSG00000105929;ENSG00000111319;ENSG00000113073;ENSG00000116039;ENSG00000140519;ENSG00000143839;ENSG00000143921;ENSG00000147614;ENSG00000155066;ENSG00000164363;ENSG00000166828;ENSG00000169344;ENSG00000173898;ENSG00000174502;ENSG00000180251;ENSG00000188687;ENSG00000241186
GO:0016471	vacuolar proton-transporting V-type ATPase complex	4	19	0.000677481	0.0274558	ENSG00000105929;ENSG00000116039;ENSG00000147614;ENSG00000151418
GO:0044459	plasma membrane part	88	2896	0.000699854	0.0274558	ENSG00000001626;ENSG00000004939;ENSG00000007216;ENSG00000043591;ENSG00000066032;ENSG00000070729;ENSG00000072041;ENSG00000075461;ENSG00000080511;ENSG00000086159;ENSG00000087128;ENSG00000099822;ENSG00000102239;ENSG00000103269;ENSG00000103546;ENSG00000104755;ENSG00000105143;ENSG00000105388;ENSG00000105642;ENSG00000105929;ENSG00000111319;ENSG00000112077;ENSG00000113073;ENSG00000113302;ENSG00000116039…
GO:1902495	transmembrane transporter complex	17	325	0.000876599	0.0319333	ENSG00000001626;ENSG00000070729;ENSG00000075461;ENSG00000099822;ENSG00000105642;ENSG00000111319;ENSG00000130433;ENSG00000143921;ENSG00000148408;ENSG00000149305;ENSG00000152208;ENSG00000162763;ENSG00000166828;ENSG00000170289;ENSG00000184908;ENSG00000186297;ENSG00000186510
GO:0005887	integral component of plasma membrane	55	1641	0.000992722	0.0337525	ENSG00000001626;ENSG00000004939;ENSG00000007216;ENSG00000043591;ENSG00000072041;ENSG00000075461;ENSG00000080511;ENSG00000086159;ENSG00000087128;ENSG00000099822;ENSG00000102239;ENSG00000103269;ENSG00000103546;ENSG00000104755;ENSG00000105143;ENSG00000105388;ENSG00000105642;ENSG00000111319;ENSG00000112077;ENSG00000116176;ENSG00000118596;ENSG00000128310;ENSG00000132677;ENSG00000138039;ENSG00000138696…
GO:0016324	apical plasma membrane	18	364	0.00118632	0.0378138	ENSG00000001626;ENSG00000086159;ENSG00000105388;ENSG00000105929;ENSG00000111319;ENSG00000116039;ENSG00000140519;ENSG00000143921;ENSG00000147614;ENSG00000155066;ENSG00000164363;ENSG00000166828;ENSG00000169344;ENSG00000173898;ENSG00000174502;ENSG00000180251;ENSG00000188687;ENSG00000241186
GO:1990351	transporter complex	17	340	0.00142998	0.0422552	ENSG00000001626;ENSG00000070729;ENSG00000075461;ENSG00000099822;ENSG00000105642;ENSG00000111319;ENSG00000130433;ENSG00000143921;ENSG00000148408;ENSG00000149305;ENSG00000152208;ENSG00000162763;ENSG00000166828;ENSG00000170289;ENSG00000184908;ENSG00000186297;ENSG00000186510
GO:0031224	intrinsic component of membrane	157	5868	0.00149136	0.0422552	ENSG00000001626;ENSG00000004939;ENSG00000005108;ENSG00000007216;ENSG00000043591;ENSG00000055732;ENSG00000069206;ENSG00000070729;ENSG00000072041;ENSG00000073150;ENSG00000075461;ENSG00000079393;ENSG00000080511;ENSG00000086159;ENSG00000087128;ENSG00000099822;ENSG00000100095;ENSG00000101638;ENSG00000102239;ENSG00000103269;ENSG00000103546;ENSG00000104755;ENSG00000105143;ENSG00000105388;ENSG00000105428…
GO:0044425	membrane part	185	7144	0.00210701	0.0565566	ENSG00000001626;ENSG00000004939;ENSG00000005108;ENSG00000007216;ENSG00000043591;ENSG00000055732;ENSG00000066032;ENSG00000069206;ENSG00000070729;ENSG00000072041;ENSG00000073150;ENSG00000075461;ENSG00000079393;ENSG00000080511;ENSG00000084674;ENSG00000086159;ENSG00000087128;ENSG00000099822;ENSG00000100095;ENSG00000101210;ENSG00000101638;ENSG00000102239;ENSG00000103269;ENSG00000103546;ENSG00000104755…
GO:0098688	parallel fiber to Purkinje cell synapse	3	13	0.00253437	0.0638664	ENSG00000137766;ENSG00000152208;ENSG00000173898
GO:0033176	proton-transporting V-type ATPase complex	4	27	0.00267161	0.0638664	ENSG00000105929;ENSG00000116039;ENSG00000147614;ENSG00000151418
GO:0034702	ion channel complex	15	301	0.00275502	0.0638664	ENSG00000001626;ENSG00000070729;ENSG00000075461;ENSG00000099822;ENSG00000105642;ENSG00000111319;ENSG00000130433;ENSG00000148408;ENSG00000149305;ENSG00000152208;ENSG00000162763;ENSG00000166828;ENSG00000184908;ENSG00000186297;ENSG00000186510
GO:0031226	intrinsic component of plasma membrane	55	1723	0.00291715	0.0646846	ENSG00000001626;ENSG00000004939;ENSG00000007216;ENSG00000043591;ENSG00000072041;ENSG00000075461;ENSG00000080511;ENSG00000086159;ENSG00000087128;ENSG00000099822;ENSG00000102239;ENSG00000103269;ENSG00000103546;ENSG00000104755;ENSG00000105143;ENSG00000105388;ENSG00000105642;ENSG00000111319;ENSG00000112077;ENSG00000116176;ENSG00000118596;ENSG00000128310;ENSG00000132677;ENSG00000138039;ENSG00000138696…
GO:0031093	platelet alpha granule lumen	6	66	0.0031972	0.0676816	ENSG00000113889;ENSG00000167244;ENSG00000171557;ENSG00000171560;ENSG00000171564;ENSG00000229314
GO:0016021	integral component of membrane	151	5713	0.00331773	0.0676816	ENSG00000001626;ENSG00000004939;ENSG00000005108;ENSG00000007216;ENSG00000043591;ENSG00000055732;ENSG00000069206;ENSG00000070729;ENSG00000072041;ENSG00000073150;ENSG00000075461;ENSG00000079393;ENSG00000080511;ENSG00000086159;ENSG00000087128;ENSG00000099822;ENSG00000100095;ENSG00000101638;ENSG00000102239;ENSG00000103269;ENSG00000103546;ENSG00000104755;ENSG00000105143;ENSG00000105388;ENSG00000105428…
GO:0016323	basolateral plasma membrane	13	250	0.00360425	0.0706987	ENSG00000004939;ENSG00000105388;ENSG00000113073;ENSG00000116039;ENSG00000132677;ENSG00000140519;ENSG00000147606;ENSG00000155066;ENSG00000162399;ENSG00000167419;ENSG00000169344;ENSG00000178568;ENSG00000180251
GO:0031225	anchored component of membrane	10	172	0.00471669	0.089093	ENSG00000105388;ENSG00000113805;ENSG00000125861;ENSG00000132677;ENSG00000163283;ENSG00000167656;ENSG00000169344;ENSG00000171772;ENSG00000177202;ENSG00000241186
GO:0005921	gap junction	4	34	0.00626005	0.114022	ENSG00000073150;ENSG00000159248;ENSG00000164411;ENSG00000188910
GO:0031904	endosome lumen	4	35	0.00694783	0.122186	ENSG00000084674;ENSG00000113302;ENSG00000136487;ENSG00000168878
GO:0099503	secretory vesicle	34	1027	0.0109949	0.186914	ENSG00000103528;ENSG00000104112;ENSG00000104918;ENSG00000110975;ENSG00000111319;ENSG00000113889;ENSG00000116039;ENSG00000118271;ENSG00000137766;ENSG00000141316;ENSG00000142515;ENSG00000143556;ENSG00000145087;ENSG00000157404;ENSG00000159224;ENSG00000160472;ENSG00000161610;ENSG00000163273;ENSG00000167244;ENSG00000167748;ENSG00000167754;ENSG00000167757;ENSG00000168481;ENSG00000168878;ENSG00000170011…
GO:0005922	connexin complex	3	22	0.011796	0.189818	ENSG00000159248;ENSG00000164411;ENSG00000188910
GO:0031012	extracellular matrix	21	560	0.0122002	0.189818	ENSG00000102678;ENSG00000107518;ENSG00000113889;ENSG00000116194;ENSG00000124102;ENSG00000125363;ENSG00000142449;ENSG00000143556;ENSG00000152595;ENSG00000158270;ENSG00000162951;ENSG00000164946;ENSG00000165623;ENSG00000171557;ENSG00000171560;ENSG00000171564;ENSG00000178031;ENSG00000183287;ENSG00000198732;ENSG00000229314;ENSG00000265190
GO:0000801	central element	2	8	0.0122823	0.189818	ENSG00000171772;ENSG00000179008
GO:0030141	secretory granule	29	857	0.0138593	0.206575	ENSG00000104112;ENSG00000104918;ENSG00000111319;ENSG00000113889;ENSG00000118271;ENSG00000141316;ENSG00000142515;ENSG00000143556;ENSG00000145087;ENSG00000157404;ENSG00000159224;ENSG00000160472;ENSG00000161610;ENSG00000163273;ENSG00000167244;ENSG00000167748;ENSG00000167754;ENSG00000167757;ENSG00000168878;ENSG00000170011;ENSG00000171557;ENSG00000171560;ENSG00000171564;ENSG00000174562;ENSG00000177202…
GO:0031091	platelet alpha granule	6	90	0.0141767	0.206575	ENSG00000113889;ENSG00000167244;ENSG00000171557;ENSG00000171560;ENSG00000171564;ENSG00000229314
GO:0014731	spectrin-associated cytoskeleton	2	9	0.0155646	0.209246	ENSG00000132677;ENSG00000173898
GO:0031906	late endosome lumen	2	9	0.0155646	0.209246	ENSG00000113302;ENSG00000168878
GO:0098590	plasma membrane region	38	1208	0.0158329	0.209246	ENSG00000001626;ENSG00000004939;ENSG00000070729;ENSG00000075461;ENSG00000086159;ENSG00000103546;ENSG00000105143;ENSG00000105388;ENSG00000105929;ENSG00000111319;ENSG00000113073;ENSG00000116039;ENSG00000132677;ENSG00000137766;ENSG00000140519;ENSG00000140623;ENSG00000143921;ENSG00000147606;ENSG00000147614;ENSG00000149305;ENSG00000152208;ENSG00000152822;ENSG00000155066;ENSG00000162399;ENSG00000162951…
GO:0099512	supramolecular fiber	32	991	0.0185254	0.209246	ENSG00000004939;ENSG00000091482;ENSG00000105141;ENSG00000109205;ENSG00000129152;ENSG00000129991;ENSG00000131737;ENSG00000135480;ENSG00000148935;ENSG00000152086;ENSG00000158022;ENSG00000163395;ENSG00000169067;ENSG00000170423;ENSG00000170454;ENSG00000170465;ENSG00000170477;ENSG00000171346;ENSG00000177354;ENSG00000185479;ENSG00000186081;ENSG00000186832;ENSG00000186847;ENSG00000188581;ENSG00000189169…
GO:0033179	proton-transporting V-type ATPase, V0 domain	2	10	0.0191765	0.209246	ENSG00000105929;ENSG00000147614
GO:0099081	supramolecular polymer	32	999	0.0205014	0.209246	ENSG00000004939;ENSG00000091482;ENSG00000105141;ENSG00000109205;ENSG00000129152;ENSG00000129991;ENSG00000131737;ENSG00000135480;ENSG00000148935;ENSG00000152086;ENSG00000158022;ENSG00000163395;ENSG00000169067;ENSG00000170423;ENSG00000170454;ENSG00000170465;ENSG00000170477;ENSG00000171346;ENSG00000177354;ENSG00000185479;ENSG00000186081;ENSG00000186832;ENSG00000186847;ENSG00000188581;ENSG00000189169…
GO:0032809	neuronal cell body membrane	3	27	0.0206758	0.209246	ENSG00000103546;ENSG00000135824;ENSG00000186297
GO:0099080	supramolecular complex	32	1000	0.0207598	0.209246	ENSG00000004939;ENSG00000091482;ENSG00000105141;ENSG00000109205;ENSG00000129152;ENSG00000129991;ENSG00000131737;ENSG00000135480;ENSG00000148935;ENSG00000152086;ENSG00000158022;ENSG00000163395;ENSG00000169067;ENSG00000170423;ENSG00000170454;ENSG00000170465;ENSG00000170477;ENSG00000171346;ENSG00000177354;ENSG00000185479;ENSG00000186081;ENSG00000186832;ENSG00000186847;ENSG00000188581;ENSG00000189169…
GO:0009986	cell surface	29	887	0.0209943	0.209246	ENSG00000001626;ENSG00000075461;ENSG00000103546;ENSG00000105388;ENSG00000113302;ENSG00000125363;ENSG00000125861;ENSG00000137440;ENSG00000145242;ENSG00000149305;ENSG00000155066;ENSG00000157404;ENSG00000162006;ENSG00000163283;ENSG00000166828;ENSG00000167656;ENSG00000169344;ENSG00000169393;ENSG00000170477;ENSG00000171557;ENSG00000171560;ENSG00000171564;ENSG00000174502;ENSG00000186417;ENSG00000204655…
GO:0005788	endoplasmic reticulum lumen	13	313	0.0210919	0.209246	ENSG00000084674;ENSG00000104112;ENSG00000113302;ENSG00000113889;ENSG00000125363;ENSG00000139055;ENSG00000152595;ENSG00000159224;ENSG00000168785;ENSG00000171557;ENSG00000171560;ENSG00000178031;ENSG00000185269
GO:0017071	intracellular cyclic nucleotide activated cation channel complex	1	1	0.0219065	0.209246	ENSG00000070729
GO:0034359	mature chylomicron	1	1	0.0219065	0.209246	ENSG00000084674
GO:0034360	chylomicron remnant	1	1	0.0219065	0.209246	ENSG00000084674
GO:0038038	G protein-coupled receptor homodimeric complex	1	1	0.0219065	0.209246	ENSG00000152822
GO:0071575	integral component of external side of plasma membrane	1	1	0.0219065	0.209246	ENSG00000105388
GO:0099189	postsynaptic spectrin-associated cytoskeleton	1	1	0.0219065	0.209246	ENSG00000173898
GO:1990512	Cry-Per complex	1	1	0.0219065	0.209246	ENSG00000166049
GO:0034707	chloride channel complex	4	49	0.0221555	0.209246	ENSG00000001626;ENSG00000184908;ENSG00000186297;ENSG00000186510
GO:0060076	excitatory synapse	4	49	0.0221555	0.209246	ENSG00000137766;ENSG00000152208;ENSG00000162951;ENSG00000173898
GO:0099060	integral component of postsynaptic specialization membrane	5	74	0.0231152	0.213191	ENSG00000075461;ENSG00000152208;ENSG00000162951;ENSG00000178568;ENSG00000186297
GO:0031982	vesicle	103	3928	0.0234092	0.213191	ENSG00000001626;ENSG00000004939;ENSG00000007216;ENSG00000043591;ENSG00000044012;ENSG00000055732;ENSG00000070729;ENSG00000075461;ENSG00000084674;ENSG00000086159;ENSG00000095713;ENSG00000100078;ENSG00000103528;ENSG00000104112;ENSG00000104918;ENSG00000105388;ENSG00000105929;ENSG00000110975;ENSG00000111319;ENSG00000112530;ENSG00000113302;ENSG00000113889;ENSG00000116039;ENSG00000116194;ENSG00000118271…
GO:1990454	L-type voltage-gated calcium channel complex	2	12	0.0273264	0.23944	ENSG00000075461;ENSG00000130433
GO:0044298	cell body membrane	3	30	0.027355	0.23944	ENSG00000103546;ENSG00000135824;ENSG00000186297
GO:0034703	cation channel complex	10	226	0.0277	0.23944	ENSG00000070729;ENSG00000075461;ENSG00000099822;ENSG00000105642;ENSG00000111319;ENSG00000130433;ENSG00000148408;ENSG00000149305;ENSG00000162763;ENSG00000166828
GO:0098948	intrinsic component of postsynaptic specialization membrane	5	78	0.0282473	0.240102	ENSG00000075461;ENSG00000152208;ENSG00000162951;ENSG00000178568;ENSG00000186297
GO:0072562	blood microparticle	7	136	0.0303037	0.250012	ENSG00000004939;ENSG00000113889;ENSG00000171557;ENSG00000171560;ENSG00000171564;ENSG00000223609;ENSG00000229314
GO:0016469	proton-transporting two-sector ATPase complex	4	54	0.0303937	0.250012	ENSG00000105929;ENSG00000116039;ENSG00000147614;ENSG00000151418
GO:0000786	nucleosome	6	111	0.0353781	0.286394	ENSG00000184270;ENSG00000187837;ENSG00000197153;ENSG00000274618;ENSG00000275126;ENSG00000276410
GO:0005927	muscle tendon junction	1	2	0.0433342	0.320296	ENSG00000091482
GO:0043514	interleukin-12 complex	1	2	0.0433342	0.320296	ENSG00000113302
GO:0044301	climbing fiber	1	2	0.0433342	0.320296	ENSG00000131094
GO:0070743	interleukin-23 complex	1	2	0.0433342	0.320296	ENSG00000113302
GO:0071914	prominosome	1	2	0.0433342	0.320296	ENSG00000155066
GO:1904602	serotonin-activated cation-selective channel complex	1	2	0.0433342	0.320296	ENSG00000149305
GO:0042599	lamellar body	2	16	0.0469166	0.337795	ENSG00000167754;ENSG00000168878
GO:0044815	DNA packaging complex	6	119	0.0470264	0.337795	ENSG00000184270;ENSG00000187837;ENSG00000197153;ENSG00000274618;ENSG00000275126;ENSG00000276410
GO:0099634	postsynaptic specialization membrane	6	120	0.0486308	0.344468	ENSG00000075461;ENSG00000152208;ENSG00000152822;ENSG00000162951;ENSG00000178568;ENSG00000186297
GO:0099513	polymeric cytoskeletal fiber	24	766	0.0507578	0.354609	ENSG00000105141;ENSG00000131737;ENSG00000135480;ENSG00000148935;ENSG00000152086;ENSG00000158022;ENSG00000169067;ENSG00000170423;ENSG00000170454;ENSG00000170465;ENSG00000170477;ENSG00000171346;ENSG00000185479;ENSG00000186081;ENSG00000186832;ENSG00000186847;ENSG00000188581;ENSG00000189169;ENSG00000189182;ENSG00000196224;ENSG00000204897;ENSG00000205420;ENSG00000212724;ENSG00000241233
GO:0070062	extracellular exosome	57	2112	0.0561319	0.386855	ENSG00000004939;ENSG00000007216;ENSG00000044012;ENSG00000084674;ENSG00000095713;ENSG00000104918;ENSG00000105388;ENSG00000105929;ENSG00000111319;ENSG00000113889;ENSG00000116039;ENSG00000116194;ENSG00000118271;ENSG00000133742;ENSG00000134757;ENSG00000135480;ENSG00000140519;ENSG00000142515;ENSG00000143320;ENSG00000145147;ENSG00000147614;ENSG00000155066;ENSG00000159763;ENSG00000163207;ENSG00000163209…
GO:0033181	plasma membrane proton-transporting V-type ATPase complex	1	3	0.0642936	0.415037	ENSG00000147614
GO:0098855	HCN channel complex	1	3	0.0642936	0.415037	ENSG00000099822
GO:1990513	CLOCK-BMAL transcription complex	1	3	0.0642936	0.415037	ENSG00000166049
GO:1990584	cardiac Troponin complex	1	3	0.0642936	0.415037	ENSG00000129991
GO:0044297	cell body	19	594	0.0649507	0.415037	ENSG00000075461;ENSG00000084674;ENSG00000100362;ENSG00000101210;ENSG00000102239;ENSG00000103546;ENSG00000105642;ENSG00000110680;ENSG00000112530;ENSG00000135824;ENSG00000138696;ENSG00000145242;ENSG00000147571;ENSG00000154678;ENSG00000159224;ENSG00000165553;ENSG00000165694;ENSG00000173898;ENSG00000186297
GO:1903561	extracellular vesicle	57	2133	0.0651038	0.415037	ENSG00000004939;ENSG00000007216;ENSG00000044012;ENSG00000084674;ENSG00000095713;ENSG00000104918;ENSG00000105388;ENSG00000105929;ENSG00000111319;ENSG00000113889;ENSG00000116039;ENSG00000116194;ENSG00000118271;ENSG00000133742;ENSG00000134757;ENSG00000135480;ENSG00000140519;ENSG00000142515;ENSG00000143320;ENSG00000145147;ENSG00000147614;ENSG00000155066;ENSG00000159763;ENSG00000163207;ENSG00000163209…
GO:0043230	extracellular organelle	57	2135	0.0660103	0.415621	ENSG00000004939;ENSG00000007216;ENSG00000044012;ENSG00000084674;ENSG00000095713;ENSG00000104918;ENSG00000105388;ENSG00000105929;ENSG00000111319;ENSG00000113889;ENSG00000116039;ENSG00000116194;ENSG00000118271;ENSG00000133742;ENSG00000134757;ENSG00000135480;ENSG00000140519;ENSG00000142515;ENSG00000143320;ENSG00000145147;ENSG00000147614;ENSG00000155066;ENSG00000159763;ENSG00000163207;ENSG00000163209…
GO:0043025	neuronal cell body	17	522	0.0684377	0.418122	ENSG00000084674;ENSG00000100362;ENSG00000101210;ENSG00000102239;ENSG00000103546;ENSG00000105642;ENSG00000110680;ENSG00000135824;ENSG00000138696;ENSG00000145242;ENSG00000147571;ENSG00000154678;ENSG00000159224;ENSG00000165553;ENSG00000165694;ENSG00000173898;ENSG00000186297
GO:0035267	NuA4 histone acetyltransferase complex	2	20	0.0701775	0.418122	ENSG00000077080;ENSG00000169067
GO:0043189	H4/H2A histone acetyltransferase complex	2	20	0.0701775	0.418122	ENSG00000077080;ENSG00000169067
GO:0060205	cytoplasmic vesicle lumen	12	339	0.0709265	0.418122	ENSG00000084674;ENSG00000104112;ENSG00000104918;ENSG00000113889;ENSG00000118271;ENSG00000143556;ENSG00000159224;ENSG00000167244;ENSG00000171557;ENSG00000171560;ENSG00000171564;ENSG00000229314
GO:0005891	voltage-gated calcium channel complex	3	44	0.0715094	0.418122	ENSG00000075461;ENSG00000130433;ENSG00000148408
GO:0016020	membrane	228	9721	0.0720107	0.418122	ENSG00000001626;ENSG00000004939;ENSG00000005108;ENSG00000007216;ENSG00000041515;ENSG00000043591;ENSG00000055732;ENSG00000066032;ENSG00000069206;ENSG00000070729;ENSG00000072041;ENSG00000073150;ENSG00000075461;ENSG00000077009;ENSG00000079393;ENSG00000080511;ENSG00000084674;ENSG00000086159;ENSG00000087128;ENSG00000095203;ENSG00000099822;ENSG00000100078;ENSG00000100095;ENSG00000100341;ENSG00000101210…
GO:0031983	vesicle lumen	12	340	0.0721465	0.418122	ENSG00000084674;ENSG00000104112;ENSG00000104918;ENSG00000113889;ENSG00000118271;ENSG00000143556;ENSG00000159224;ENSG00000167244;ENSG00000171557;ENSG00000171560;ENSG00000171564;ENSG00000229314
GO:0062023	collagen-containing extracellular matrix	14	421	0.0809253	0.436822	ENSG00000102678;ENSG00000107518;ENSG00000113889;ENSG00000116194;ENSG00000125363;ENSG00000142449;ENSG00000143556;ENSG00000164946;ENSG00000171557;ENSG00000171560;ENSG00000171564;ENSG00000198732;ENSG00000229314;ENSG00000265190
GO:0000220	vacuolar proton-transporting V-type ATPase, V0 domain	1	4	0.0847949	0.436822	ENSG00000105929
GO:0005853	eukaryotic translation elongation factor 1 complex	1	4	0.0847949	0.436822	ENSG00000101210
GO:0034271	phosphatidylinositol 3-kinase complex, class III, type I	1	4	0.0847949	0.436822	ENSG00000196289
GO:0034272	phosphatidylinositol 3-kinase complex, class III, type II	1	4	0.0847949	0.436822	ENSG00000196289
GO:0043159	acrosomal matrix	1	4	0.0847949	0.436822	ENSG00000141316
GO:0044393	microspike	1	4	0.0847949	0.436822	ENSG00000155066
GO:0097209	epidermal lamellar body	1	4	0.0847949	0.436822	ENSG00000167754
GO:0098850	extrinsic component of synaptic vesicle membrane	1	4	0.0847949	0.436822	ENSG00000116039
GO:1990578	perinuclear endoplasmic reticulum membrane	1	4	0.0847949	0.436822	ENSG00000166391
GO:1990604	IRE1-TRAF2-ASK1 complex	1	4	0.0847949	0.436822	ENSG00000134398
GO:0019898	extrinsic component of membrane	11	315	0.0874818	0.446157	ENSG00000066032;ENSG00000116039;ENSG00000135824;ENSG00000139144;ENSG00000141750;ENSG00000154162;ENSG00000169344;ENSG00000185133;ENSG00000196289;ENSG00000241186;ENSG00000263155
GO:0034774	secretory granule lumen	11	320	0.0950228	0.479818	ENSG00000104112;ENSG00000104918;ENSG00000113889;ENSG00000118271;ENSG00000143556;ENSG00000159224;ENSG00000167244;ENSG00000171557;ENSG00000171560;ENSG00000171564;ENSG00000229314
GO:0099061	integral component of postsynaptic density membrane	3	51	0.100807	0.504037	ENSG00000075461;ENSG00000152208;ENSG00000178568
GO:0002079	inner acrosomal membrane	1	5	0.104848	0.514159	ENSG00000160472
GO:0034363	intermediate-density lipoprotein particle	1	5	0.104848	0.514159	ENSG00000084674
GO:0098797	plasma membrane protein complex	18	597	0.107828	0.520939	ENSG00000066032;ENSG00000075461;ENSG00000099822;ENSG00000105642;ENSG00000130433;ENSG00000138696;ENSG00000143921;ENSG00000147614;ENSG00000148408;ENSG00000149305;ENSG00000152208;ENSG00000152822;ENSG00000154162;ENSG00000159248;ENSG00000162763;ENSG00000164411;ENSG00000166828;ENSG00000188910
GO:0098878	neurotransmitter receptor complex	3	53	0.109934	0.520939	ENSG00000075461;ENSG00000149305;ENSG00000152208
GO:0031430	M band	2	26	0.110316	0.520939	ENSG00000091482;ENSG00000158022
GO:0034706	sodium channel complex	2	26	0.110316	0.520939	ENSG00000111319;ENSG00000166828
GO:0033177	proton-transporting two-sector ATPase complex, proton-transporting domain	2	27	0.117488	0.534738	ENSG00000105929;ENSG00000147614
GO:0099055	integral component of postsynaptic membrane	5	118	0.117606	0.534738	ENSG00000075461;ENSG00000152208;ENSG00000162951;ENSG00000178568;ENSG00000186297
GO:0099699	integral component of synaptic membrane	6	152	0.117615	0.534738	ENSG00000075461;ENSG00000105143;ENSG00000152208;ENSG00000162951;ENSG00000178568;ENSG00000186297
GO:0099146	intrinsic component of postsynaptic density membrane	3	55	0.119366	0.534738	ENSG00000075461;ENSG00000152208;ENSG00000178568
GO:0001669	acrosomal vesicle	5	120	0.123835	0.534738	ENSG00000111319;ENSG00000141316;ENSG00000157404;ENSG00000160472;ENSG00000177202
GO:0042629	mast cell granule	1	6	0.124463	0.534738	ENSG00000109684
GO:0043190	ATP-binding cassette (ABC) transporter complex	1	6	0.124463	0.534738	ENSG00000143921
GO:0097227	sperm annulus	1	6	0.124463	0.534738	ENSG00000140623
GO:0098574	cytoplasmic side of lysosomal membrane	1	6	0.124463	0.534738	ENSG00000101210
GO:0002080	acrosomal membrane	2	28	0.124772	0.534738	ENSG00000141316;ENSG00000160472
GO:0031045	dense core granule	2	28	0.124772	0.534738	ENSG00000145087;ENSG00000170011
GO:0030863	cortical cytoskeleton	5	121	0.127006	0.534939	ENSG00000004939;ENSG00000100362;ENSG00000170011;ENSG00000173898;ENSG00000263155
GO:0044448	cell cortex part	7	191	0.127356	0.534939	ENSG00000004939;ENSG00000100362;ENSG00000137766;ENSG00000140623;ENSG00000170011;ENSG00000173898;ENSG00000263155
GO:0043195	terminal bouton	3	57	0.129085	0.534939	ENSG00000070729;ENSG00000110680;ENSG00000137766
GO:0098796	membrane protein complex	33	1227	0.129613	0.534939	ENSG00000001626;ENSG00000066032;ENSG00000070729;ENSG00000075461;ENSG00000099822;ENSG00000105143;ENSG00000105642;ENSG00000105929;ENSG00000111319;ENSG00000116039;ENSG00000130433;ENSG00000134398;ENSG00000138696;ENSG00000139144;ENSG00000143921;ENSG00000145087;ENSG00000147614;ENSG00000148408;ENSG00000149305;ENSG00000151418;ENSG00000152208;ENSG00000152822;ENSG00000154162;ENSG00000159248;ENSG00000162763…
GO:0000794	condensed nuclear chromosome	4	89	0.131396	0.534939	ENSG00000165181;ENSG00000165556;ENSG00000171772;ENSG00000179008
GO:0060170	ciliary membrane	4	89	0.131396	0.534939	ENSG00000070729;ENSG00000111319;ENSG00000155066;ENSG00000169344
GO:0005942	phosphatidylinositol 3-kinase complex	2	29	0.132161	0.534939	ENSG00000139144;ENSG00000196289
GO:0097223	sperm part	8	230	0.133797	0.537295	ENSG00000111319;ENSG00000112530;ENSG00000140623;ENSG00000141316;ENSG00000157404;ENSG00000160472;ENSG00000177202;ENSG00000186458
GO:0098936	intrinsic component of postsynaptic membrane	5	124	0.136738	0.542674	ENSG00000075461;ENSG00000152208;ENSG00000162951;ENSG00000178568;ENSG00000186297
GO:0030864	cortical actin cytoskeleton	4	92	0.143208	0.542674	ENSG00000100362;ENSG00000170011;ENSG00000173898;ENSG00000263155
GO:0030016	myofibril	8	234	0.143265	0.542674	ENSG00000004939;ENSG00000091482;ENSG00000129152;ENSG00000129991;ENSG00000158022;ENSG00000163395;ENSG00000177354;ENSG00000263155
GO:0035032	phosphatidylinositol 3-kinase complex, class III	1	7	0.143649	0.542674	ENSG00000196289
GO:0038037	G protein-coupled receptor dimeric complex	1	7	0.143649	0.542674	ENSG00000152822
GO:0097208	alveolar lamellar body	1	7	0.143649	0.542674	ENSG00000168878
GO:0097486	multivesicular body lumen	1	7	0.143649	0.542674	ENSG00000168878
GO:0097512	cardiac myofibril	1	7	0.143649	0.542674	ENSG00000129991
GO:0097708	intracellular vesicle	61	2438	0.146528	0.54948	ENSG00000001626;ENSG00000043591;ENSG00000055732;ENSG00000070729;ENSG00000075461;ENSG00000084674;ENSG00000086159;ENSG00000100078;ENSG00000103528;ENSG00000104112;ENSG00000104918;ENSG00000105929;ENSG00000110975;ENSG00000111319;ENSG00000113302;ENSG00000113889;ENSG00000116039;ENSG00000118271;ENSG00000125363;ENSG00000126950;ENSG00000132677;ENSG00000136487;ENSG00000137766;ENSG00000138039;ENSG00000140519…
GO:0098839	postsynaptic density membrane	4	94	0.151308	0.563262	ENSG00000075461;ENSG00000152208;ENSG00000152822;ENSG00000178568
GO:0030018	Z disc	5	129	0.153663	0.567885	ENSG00000004939;ENSG00000158022;ENSG00000163395;ENSG00000177354;ENSG00000263155
GO:0005581	collagen trimer	4	95	0.155421	0.570251	ENSG00000131094;ENSG00000158270;ENSG00000183287;ENSG00000186417
GO:0099240	intrinsic component of synaptic membrane	6	166	0.157944	0.572083	ENSG00000075461;ENSG00000105143;ENSG00000152208;ENSG00000162951;ENSG00000178568;ENSG00000186297
GO:0033180	proton-transporting V-type ATPase, V1 domain	1	8	0.162416	0.572083	ENSG00000116039
GO:0099571	postsynaptic cytoskeleton	1	8	0.162416	0.572083	ENSG00000173898
GO:1990712	HFE-transferrin receptor complex	1	8	0.162416	0.572083	ENSG00000138696
GO:0016342	catenin complex	2	33	0.162611	0.572083	ENSG00000066032;ENSG00000154162
GO:0043292	contractile fiber	8	242	0.16316	0.572083	ENSG00000004939;ENSG00000091482;ENSG00000129152;ENSG00000129991;ENSG00000158022;ENSG00000163395;ENSG00000177354;ENSG00000263155
GO:0005604	basement membrane	4	97	0.163773	0.572083	ENSG00000102678;ENSG00000107518;ENSG00000164946;ENSG00000198732
GO:0097458	neuron part	46	1822	0.172476	0.598205	ENSG00000066032;ENSG00000070729;ENSG00000075461;ENSG00000077080;ENSG00000084674;ENSG00000100362;ENSG00000101210;ENSG00000102239;ENSG00000103546;ENSG00000105143;ENSG00000105642;ENSG00000110680;ENSG00000110975;ENSG00000112530;ENSG00000113805;ENSG00000116039;ENSG00000131094;ENSG00000135824;ENSG00000137766;ENSG00000138696;ENSG00000145087;ENSG00000145242;ENSG00000147571;ENSG00000149305;ENSG00000152208…
GO:0031410	cytoplasmic vesicle	60	2433	0.177662	0.598205	ENSG00000001626;ENSG00000043591;ENSG00000055732;ENSG00000070729;ENSG00000075461;ENSG00000084674;ENSG00000086159;ENSG00000100078;ENSG00000103528;ENSG00000104112;ENSG00000104918;ENSG00000105929;ENSG00000110975;ENSG00000111319;ENSG00000113302;ENSG00000113889;ENSG00000116039;ENSG00000118271;ENSG00000125363;ENSG00000126950;ENSG00000132677;ENSG00000136487;ENSG00000137766;ENSG00000138039;ENSG00000140519…
GO:0000785	chromatin	32	1230	0.177911	0.598205	ENSG00000004848;ENSG00000069011;ENSG00000077080;ENSG00000107187;ENSG00000109101;ENSG00000112246;ENSG00000113430;ENSG00000115112;ENSG00000124664;ENSG00000129152;ENSG00000131668;ENSG00000131721;ENSG00000131910;ENSG00000135373;ENSG00000136944;ENSG00000138136;ENSG00000139445;ENSG00000163623;ENSG00000165556;ENSG00000168269;ENSG00000173253;ENSG00000178403;ENSG00000178860;ENSG00000180613;ENSG00000184270…
GO:0005861	troponin complex	1	9	0.180772	0.598205	ENSG00000129991
GO:0008091	spectrin	1	9	0.180772	0.598205	ENSG00000173898
GO:0032437	cuticular plate	1	9	0.180772	0.598205	ENSG00000100362
GO:0043196	varicosity	1	9	0.180772	0.598205	ENSG00000147571
GO:0097648	G protein-coupled receptor complex	1	9	0.180772	0.598205	ENSG00000152822
GO:0030017	sarcomere	7	211	0.181807	0.598205	ENSG00000004939;ENSG00000091482;ENSG00000129991;ENSG00000158022;ENSG00000163395;ENSG00000177354;ENSG00000263155
GO:0005775	vacuolar lumen	6	174	0.183362	0.599452	ENSG00000084674;ENSG00000104918;ENSG00000118271;ENSG00000143556;ENSG00000197641;ENSG00000204099
GO:0019897	extrinsic component of plasma membrane	6	178	0.196643	0.635186	ENSG00000066032;ENSG00000135824;ENSG00000141750;ENSG00000154162;ENSG00000241186;ENSG00000263155
GO:0031674	I band	5	141	0.197494	0.635186	ENSG00000004939;ENSG00000158022;ENSG00000163395;ENSG00000177354;ENSG00000263155
GO:0099056	integral component of presynaptic membrane	3	70	0.198029	0.635186	ENSG00000105143;ENSG00000178568;ENSG00000186297
GO:0034704	calcium channel complex	3	71	0.203664	0.64918	ENSG00000075461;ENSG00000130433;ENSG00000148408
GO:0000791	euchromatin	2	39	0.210192	0.662653	ENSG00000129152;ENSG00000187837
GO:0043235	receptor complex	12	419	0.21049	0.662653	ENSG00000075461;ENSG00000113302;ENSG00000125861;ENSG00000138696;ENSG00000143921;ENSG00000145242;ENSG00000149305;ENSG00000152208;ENSG00000152822;ENSG00000157404;ENSG00000178568;ENSG00000186297
GO:0098982	GABA-ergic synapse	3	73	0.215044	0.672608	ENSG00000162951;ENSG00000178568;ENSG00000186297
GO:0031838	haptoglobin-hemoglobin complex	1	11	0.21629	0.672608	ENSG00000223609
GO:0031672	A band	2	40	0.218265	0.674637	ENSG00000091482;ENSG00000158022
GO:0042734	presynaptic membrane	5	148	0.22484	0.690775	ENSG00000103546;ENSG00000105143;ENSG00000137766;ENSG00000178568;ENSG00000186297
GO:0000421	autophagosome membrane	2	41	0.226364	0.691291	ENSG00000055732;ENSG00000164841
GO:0044449	contractile fiber part	7	226	0.228011	0.692175	ENSG00000004939;ENSG00000091482;ENSG00000129991;ENSG00000158022;ENSG00000163395;ENSG00000177354;ENSG00000263155
GO:0005845	mRNA cap binding complex	1	12	0.233468	0.699338	ENSG00000175766
GO:0000795	synaptonemal complex	2	42	0.234484	0.699338	ENSG00000171772;ENSG00000179008
GO:0099086	synaptonemal structure	2	42	0.234484	0.699338	ENSG00000171772;ENSG00000179008
GO:0030666	endocytic vesicle membrane	6	190	0.238466	0.707081	ENSG00000001626;ENSG00000075461;ENSG00000084674;ENSG00000105929;ENSG00000147614;ENSG00000158270
GO:0098889	intrinsic component of presynaptic membrane	3	79	0.249903	0.72112	ENSG00000105143;ENSG00000178568;ENSG00000186297
GO:0005833	hemoglobin complex	1	13	0.250271	0.72112	ENSG00000223609
GO:0016281	eukaryotic translation initiation factor 4F complex	1	13	0.250271	0.72112	ENSG00000175766
GO:0044214	spanning component of plasma membrane	1	13	0.250271	0.72112	ENSG00000155886
GO:0098992	neuronal dense core vesicle	1	13	0.250271	0.72112	ENSG00000145087
GO:0044437	vacuolar part	16	604	0.252672	0.723947	ENSG00000001626;ENSG00000055732;ENSG00000084674;ENSG00000101210;ENSG00000104918;ENSG00000105929;ENSG00000116039;ENSG00000118271;ENSG00000141316;ENSG00000143556;ENSG00000147614;ENSG00000151418;ENSG00000164841;ENSG00000180251;ENSG00000197641;ENSG00000204099
GO:0036126	sperm flagellum	4	117	0.254604	0.725407	ENSG00000111319;ENSG00000112530;ENSG00000140623;ENSG00000141316
GO:0098562	cytoplasmic side of membrane	6	195	0.256642	0.727151	ENSG00000004939;ENSG00000101210;ENSG00000135824;ENSG00000141750;ENSG00000157404;ENSG00000263155
GO:0009897	external side of plasma membrane	11	400	0.263067	0.731292	ENSG00000105388;ENSG00000113302;ENSG00000125861;ENSG00000145242;ENSG00000157404;ENSG00000166828;ENSG00000171557;ENSG00000171560;ENSG00000171564;ENSG00000204655;ENSG00000281179
GO:0005940	septin ring	1	14	0.266706	0.731292	ENSG00000140623
GO:0031105	septin complex	1	14	0.266706	0.731292	ENSG00000140623
GO:0034362	low-density lipoprotein particle	1	14	0.266706	0.731292	ENSG00000084674
GO:0034518	RNA cap binding complex	1	14	0.266706	0.731292	ENSG00000175766
GO:0042627	chylomicron	1	14	0.266706	0.731292	ENSG00000084674
GO:0098552	side of membrane	16	613	0.271295	0.739894	ENSG00000004939;ENSG00000101210;ENSG00000105388;ENSG00000113302;ENSG00000125861;ENSG00000135824;ENSG00000141750;ENSG00000145242;ENSG00000157404;ENSG00000166828;ENSG00000171557;ENSG00000171560;ENSG00000171564;ENSG00000204655;ENSG00000263155;ENSG00000281179
GO:0008328	ionotropic glutamate receptor complex	2	47	0.27524	0.742711	ENSG00000075461;ENSG00000152208
GO:1902562	H4 histone acetyltransferase complex	2	47	0.27524	0.742711	ENSG00000077080;ENSG00000169067
GO:0045202	synapse	33	1348	0.277109	0.743818	ENSG00000043591;ENSG00000070729;ENSG00000075461;ENSG00000101210;ENSG00000101349;ENSG00000103546;ENSG00000105143;ENSG00000105642;ENSG00000110680;ENSG00000110975;ENSG00000116039;ENSG00000128310;ENSG00000131094;ENSG00000135824;ENSG00000137766;ENSG00000145087;ENSG00000147571;ENSG00000148408;ENSG00000149305;ENSG00000152208;ENSG00000152822;ENSG00000161610;ENSG00000162951;ENSG00000163395;ENSG00000168481…
GO:0002177	manchette	1	15	0.282782	0.747249	ENSG00000112530
GO:0032156	septin cytoskeleton	1	15	0.282782	0.747249	ENSG00000140623
GO:0071565	nBAF complex	1	15	0.282782	0.747249	ENSG00000077080
GO:0005869	dynactin complex	1	16	0.298507	0.78071	ENSG00000117148
GO:0098831	presynaptic active zone cytoplasmic component	1	16	0.298507	0.78071	ENSG00000137766
GO:0044430	cytoskeletal part	43	1805	0.302612	0.781718	ENSG00000041515;ENSG00000100078;ENSG00000100362;ENSG00000105141;ENSG00000109205;ENSG00000112530;ENSG00000117148;ENSG00000129991;ENSG00000131737;ENSG00000135480;ENSG00000140623;ENSG00000148935;ENSG00000152086;ENSG00000154493;ENSG00000158022;ENSG00000163207;ENSG00000166220;ENSG00000168297;ENSG00000169067;ENSG00000169344;ENSG00000170011;ENSG00000170423;ENSG00000170454;ENSG00000170465;ENSG00000170477…
GO:0097729	9+2 motile cilium	4	127	0.303352	0.781718	ENSG00000111319;ENSG00000112530;ENSG00000140623;ENSG00000141316
GO:0005791	rough endoplasmic reticulum	3	88	0.303491	0.781718	ENSG00000131914;ENSG00000145242;ENSG00000161610
GO:0001750	photoreceptor outer segment	3	89	0.309494	0.788753	ENSG00000070729;ENSG00000170011;ENSG00000170289
GO:0045334	clathrin-coated endocytic vesicle	3	89	0.309494	0.788753	ENSG00000001626;ENSG00000084674;ENSG00000168878
GO:0009898	cytoplasmic side of plasma membrane	5	169	0.312268	0.788753	ENSG00000004939;ENSG00000135824;ENSG00000141750;ENSG00000157404;ENSG00000263155
GO:0033178	proton-transporting two-sector ATPase complex, catalytic domain	1	17	0.313887	0.788753	ENSG00000116039
GO:0030139	endocytic vesicle	9	335	0.314146	0.788753	ENSG00000001626;ENSG00000075461;ENSG00000084674;ENSG00000105929;ENSG00000125363;ENSG00000147614;ENSG00000158270;ENSG00000166148;ENSG00000168878
GO:0008076	voltage-gated potassium channel complex	3	90	0.315501	0.788753	ENSG00000099822;ENSG00000105642;ENSG00000162763
GO:0032993	protein-DNA complex	6	212	0.320799	0.795972	ENSG00000184270;ENSG00000187837;ENSG00000197153;ENSG00000274618;ENSG00000275126;ENSG00000276410
GO:0035578	azurophil granule lumen	3	91	0.32151	0.795972	ENSG00000104918;ENSG00000118271;ENSG00000143556
GO:0030315	T-tubule	2	53	0.323961	0.798164	ENSG00000075461;ENSG00000130433
GO:0043083	synaptic cleft	1	18	0.328931	0.802656	ENSG00000131094
GO:0061827	sperm head	1	18	0.328931	0.802656	ENSG00000186458
GO:0032420	stereocilium	2	54	0.332013	0.806316	ENSG00000100362;ENSG00000167210
GO:0097060	synaptic membrane	10	384	0.333949	0.807175	ENSG00000075461;ENSG00000103546;ENSG00000105143;ENSG00000137766;ENSG00000149305;ENSG00000152208;ENSG00000152822;ENSG00000162951;ENSG00000178568;ENSG00000186297
GO:0005773	vacuole	20	818	0.338644	0.811387	ENSG00000001626;ENSG00000055732;ENSG00000084674;ENSG00000101210;ENSG00000104918;ENSG00000105929;ENSG00000109684;ENSG00000116039;ENSG00000118271;ENSG00000141316;ENSG00000143556;ENSG00000147614;ENSG00000151418;ENSG00000164841;ENSG00000168878;ENSG00000178597;ENSG00000180251;ENSG00000188282;ENSG00000197641;ENSG00000204099
GO:0098793	presynapse	13	515	0.340411	0.811387	ENSG00000070729;ENSG00000103546;ENSG00000105143;ENSG00000110680;ENSG00000110975;ENSG00000116039;ENSG00000131094;ENSG00000137766;ENSG00000161610;ENSG00000168481;ENSG00000173898;ENSG00000178568;ENSG00000186297
GO:0016514	SWI/SNF complex	1	19	0.343646	0.811387	ENSG00000077080
GO:0043034	costamere	1	19	0.343646	0.811387	ENSG00000091482
GO:1902711	GABA-A receptor complex	1	19	0.343646	0.811387	ENSG00000186297
GO:0005811	lipid droplet	3	96	0.35154	0.822523	ENSG00000084674;ENSG00000100341;ENSG00000132746
GO:0043202	lysosomal lumen	3	97	0.357533	0.822523	ENSG00000084674;ENSG00000197641;ENSG00000204099
GO:0000145	exocyst	1	20	0.358039	0.822523	ENSG00000170011
GO:0044305	calyx of Held	1	20	0.358039	0.822523	ENSG00000137766
GO:0089717	spanning component of membrane	1	20	0.358039	0.822523	ENSG00000155886
GO:1902710	GABA receptor complex	1	20	0.358039	0.822523	ENSG00000186297
GO:0036477	somatodendritic compartment	21	874	0.362802	0.823973	ENSG00000075461;ENSG00000084674;ENSG00000100362;ENSG00000101210;ENSG00000102239;ENSG00000103546;ENSG00000105642;ENSG00000110680;ENSG00000135824;ENSG00000138696;ENSG00000145242;ENSG00000147571;ENSG00000152208;ENSG00000152822;ENSG00000154678;ENSG00000159224;ENSG00000165553;ENSG00000165694;ENSG00000173898;ENSG00000185133;ENSG00000186297
GO:0015629	actin cytoskeleton	13	524	0.363114	0.823973	ENSG00000041515;ENSG00000066032;ENSG00000100362;ENSG00000117148;ENSG00000129991;ENSG00000140623;ENSG00000148935;ENSG00000154493;ENSG00000169067;ENSG00000170011;ENSG00000173641;ENSG00000173898;ENSG00000263155
GO:0005776	autophagosome	3	98	0.363518	0.823973	ENSG00000055732;ENSG00000164841;ENSG00000188282
GO:0034705	potassium channel complex	3	99	0.369494	0.825131	ENSG00000099822;ENSG00000105642;ENSG00000162763
GO:0031526	brush border membrane	2	59	0.371809	0.825131	ENSG00000105929;ENSG00000164363
GO:0034361	very-low-density lipoprotein particle	1	21	0.372118	0.825131	ENSG00000084674
GO:0034385	triglyceride-rich plasma lipoprotein particle	1	21	0.372118	0.825131	ENSG00000084674
GO:0097038	perinuclear endoplasmic reticulum	1	21	0.372118	0.825131	ENSG00000166391
GO:0000228	nuclear chromosome	8	312	0.376167	0.830498	ENSG00000077080;ENSG00000165181;ENSG00000165556;ENSG00000171772;ENSG00000179008;ENSG00000197153;ENSG00000274618;ENSG00000275126
GO:0070382	exocytic vesicle	6	228	0.383055	0.84206	ENSG00000103528;ENSG00000110975;ENSG00000116039;ENSG00000137766;ENSG00000161610;ENSG00000168481
GO:0071682	endocytic vesicle lumen	1	22	0.385888	0.84448	ENSG00000084674
GO:0035580	specific granule lumen	2	61	0.387467	0.84448	ENSG00000104918;ENSG00000229314
GO:0031253	cell projection membrane	9	360	0.391215	0.849019	ENSG00000070729;ENSG00000105929;ENSG00000111319;ENSG00000155066;ENSG00000164363;ENSG00000168907;ENSG00000169344;ENSG00000186297;ENSG00000197943
GO:0031234	extrinsic component of cytoplasmic side of plasma membrane	3	103	0.393285	0.849895	ENSG00000135824;ENSG00000141750;ENSG00000263155
GO:0032421	stereocilium bundle	2	62	0.395232	0.850499	ENSG00000100362;ENSG00000167210
GO:0005865	striated muscle thin filament	1	23	0.399357	0.855765	ENSG00000129991
GO:0031233	intrinsic component of external side of plasma membrane	1	24	0.412531	0.872991	ENSG00000105388
GO:0035327	transcriptionally active chromatin	1	24	0.412531	0.872991	ENSG00000187837
GO:0097228	sperm principal piece	1	24	0.412531	0.872991	ENSG00000111319
GO:0045211	postsynaptic membrane	7	282	0.422704	0.885562	ENSG00000075461;ENSG00000149305;ENSG00000152208;ENSG00000152822;ENSG00000162951;ENSG00000178568;ENSG00000186297
GO:0005938	cell cortex	8	326	0.422745	0.885562	ENSG00000004939;ENSG00000100362;ENSG00000137766;ENSG00000140623;ENSG00000170011;ENSG00000171564;ENSG00000173898;ENSG00000263155
GO:0030057	desmosome	1	25	0.425417	0.885562	ENSG00000134757
GO:0098533	ATPase dependent transmembrane transport complex	1	25	0.425417	0.885562	ENSG00000143921
GO:0045178	basal part of cell	2	67	0.433343	0.898394	ENSG00000178568;ENSG00000186847
GO:0032281	AMPA glutamate receptor complex	1	26	0.438021	0.904416	ENSG00000075461
GO:0031528	microvillus membrane	1	27	0.450349	0.919395	ENSG00000155066
GO:0036379	myofilament	1	27	0.450349	0.919395	ENSG00000129991
GO:0098802	plasma membrane receptor complex	5	201	0.450684	0.919395	ENSG00000075461;ENSG00000138696;ENSG00000149305;ENSG00000152208;ENSG00000152822
GO:0030669	clathrin-coated endocytic vesicle membrane	2	72	0.470131	0.955247	ENSG00000001626;ENSG00000084674
GO:0034364	high-density lipoprotein particle	1	29	0.474202	0.959695	ENSG00000084674
GO:0031594	neuromuscular junction	2	73	0.477317	0.96218	ENSG00000137766;ENSG00000145087
GO:0097730	non-motile cilium	4	164	0.485163	0.967115	ENSG00000070729;ENSG00000128310;ENSG00000170011;ENSG00000170289
GO:0098862	cluster of actin-based cell projections	4	164	0.485163	0.967115	ENSG00000100362;ENSG00000105929;ENSG00000164363;ENSG00000167210
GO:0097733	photoreceptor cell cilium	3	119	0.485454	0.967115	ENSG00000070729;ENSG00000170011;ENSG00000170289
GO:0030670	phagocytic vesicle membrane	2	75	0.491508	0.974929	ENSG00000105929;ENSG00000147614
GO:0005911	cell-cell junction	9	394	0.496706	0.974929	ENSG00000073150;ENSG00000095203;ENSG00000134757;ENSG00000157404;ENSG00000159248;ENSG00000162706;ENSG00000164411;ENSG00000188910;ENSG00000196632
GO:0044322	endoplasmic reticulum quality control compartment	1	31	0.497023	0.974929	ENSG00000134398
GO:0070971	endoplasmic reticulum exit site	1	31	0.497023	0.974929	ENSG00000084674
GO:0097225	sperm midpiece	1	32	0.508059	0.99276	ENSG00000112530
GO:0098978	glutamatergic synapse	8	354	0.514557	1	ENSG00000075461;ENSG00000105143;ENSG00000152208;ENSG00000152822;ENSG00000162951;ENSG00000169067;ENSG00000173898;ENSG00000178568
GO:0000407	phagophore assembly site	1	33	0.518855	1	ENSG00000196289
GO:0090568	nuclear transcriptional repressor complex	1	33	0.518855	1	ENSG00000166049
GO:0005790	smooth endoplasmic reticulum	1	34	0.529414	1	ENSG00000084674
GO:0043679	axon terminus	3	128	0.534278	1	ENSG00000070729;ENSG00000110680;ENSG00000137766
GO:0016235	aggresome	1	35	0.539741	1	ENSG00000173641
GO:0097731	9+0 non-motile cilium	3	130	0.544769	1	ENSG00000070729;ENSG00000170011;ENSG00000170289
GO:0000123	histone acetyltransferase complex	2	83	0.545774	1	ENSG00000077080;ENSG00000169067
GO:0005856	cytoskeleton	51	2347	0.547842	1	ENSG00000004939;ENSG00000041515;ENSG00000066032;ENSG00000095203;ENSG00000100078;ENSG00000100362;ENSG00000105141;ENSG00000105143;ENSG00000109205;ENSG00000112530;ENSG00000117148;ENSG00000129991;ENSG00000131737;ENSG00000132677;ENSG00000135480;ENSG00000140623;ENSG00000146021;ENSG00000148935;ENSG00000152086;ENSG00000154493;ENSG00000158022;ENSG00000163207;ENSG00000165694;ENSG00000166220;ENSG00000168297…
GO:0043005	neuron projection	30	1384	0.552009	1	ENSG00000066032;ENSG00000070729;ENSG00000100362;ENSG00000102239;ENSG00000103546;ENSG00000105642;ENSG00000110680;ENSG00000112530;ENSG00000113805;ENSG00000131094;ENSG00000135824;ENSG00000137766;ENSG00000138696;ENSG00000145242;ENSG00000147571;ENSG00000149305;ENSG00000152208;ENSG00000152822;ENSG00000162951;ENSG00000165694;ENSG00000167210;ENSG00000168481;ENSG00000169067;ENSG00000170011;ENSG00000170289…
GO:0098685	Schaffer collateral - CA1 synapse	2	84	0.552268	1	ENSG00000043591;ENSG00000152822
GO:0055038	recycling endosome membrane	2	85	0.558695	1	ENSG00000001626;ENSG00000147606
GO:0043198	dendritic shaft	1	37	0.559724	1	ENSG00000185133
GO:0017053	transcriptional repressor complex	2	86	0.565057	1	ENSG00000165556;ENSG00000166049
GO:0034358	plasma lipoprotein particle	1	38	0.569388	1	ENSG00000084674
GO:1990777	lipoprotein particle	1	38	0.569388	1	ENSG00000084674
GO:0005902	microvillus	2	89	0.583745	1	ENSG00000116039;ENSG00000155066
GO:0031463	Cul3-RING ubiquitin ligase complex	1	40	0.588086	1	ENSG00000146021
GO:0044433	cytoplasmic vesicle part	33	1549	0.593707	1	ENSG00000001626;ENSG00000055732;ENSG00000070729;ENSG00000075461;ENSG00000084674;ENSG00000086159;ENSG00000104112;ENSG00000104918;ENSG00000105929;ENSG00000110975;ENSG00000113302;ENSG00000113889;ENSG00000116039;ENSG00000118271;ENSG00000132677;ENSG00000136487;ENSG00000137766;ENSG00000141316;ENSG00000143556;ENSG00000147606;ENSG00000147614;ENSG00000158270;ENSG00000159224;ENSG00000160472;ENSG00000167244…
GO:0032994	protein-lipid complex	1	41	0.597129	1	ENSG00000084674
GO:0042383	sarcolemma	3	141	0.599925	1	ENSG00000075461;ENSG00000130433;ENSG00000141750
GO:0000932	P-body	2	93	0.607731	1	ENSG00000131914;ENSG00000188425
GO:0031248	protein acetyltransferase complex	2	93	0.607731	1	ENSG00000077080;ENSG00000169067
GO:1902493	acetyltransferase complex	2	93	0.607731	1	ENSG00000077080;ENSG00000169067
GO:0032590	dendrite membrane	1	43	0.614625	1	ENSG00000186297
GO:0000323	lytic vacuole	15	723	0.622693	1	ENSG00000001626;ENSG00000055732;ENSG00000084674;ENSG00000101210;ENSG00000104918;ENSG00000105929;ENSG00000109684;ENSG00000118271;ENSG00000143556;ENSG00000147614;ENSG00000164841;ENSG00000168878;ENSG00000178597;ENSG00000197641;ENSG00000204099
GO:0005764	lysosome	15	723	0.622693	1	ENSG00000001626;ENSG00000055732;ENSG00000084674;ENSG00000101210;ENSG00000104918;ENSG00000105929;ENSG00000109684;ENSG00000118271;ENSG00000143556;ENSG00000147614;ENSG00000164841;ENSG00000168878;ENSG00000178597;ENSG00000197641;ENSG00000204099
GO:0001772	immunological synapse	1	44	0.623087	1	ENSG00000187889
GO:0099738	cell cortex region	1	44	0.623087	1	ENSG00000137766
GO:0044306	neuron projection terminus	3	146	0.623502	1	ENSG00000070729;ENSG00000110680;ENSG00000137766
GO:0032587	ruffle membrane	2	99	0.641719	1	ENSG00000168907;ENSG00000197943
GO:0044427	chromosomal part	34	1631	0.646137	1	ENSG00000004848;ENSG00000069011;ENSG00000077080;ENSG00000107187;ENSG00000109101;ENSG00000112246;ENSG00000113430;ENSG00000115112;ENSG00000124664;ENSG00000129152;ENSG00000131668;ENSG00000131721;ENSG00000131910;ENSG00000135373;ENSG00000136944;ENSG00000138136;ENSG00000139445;ENSG00000163623;ENSG00000165556;ENSG00000168269;ENSG00000171772;ENSG00000173253;ENSG00000178403;ENSG00000178860;ENSG00000179008…
GO:0005774	vacuolar membrane	9	448	0.650793	1	ENSG00000001626;ENSG00000055732;ENSG00000101210;ENSG00000105929;ENSG00000116039;ENSG00000147614;ENSG00000151418;ENSG00000164841;ENSG00000180251
GO:0005796	Golgi lumen	2	101	0.652522	1	ENSG00000169344;ENSG00000172551
GO:0005766	primary lysosome	3	154	0.659213	1	ENSG00000104918;ENSG00000118271;ENSG00000143556
GO:0042582	azurophil granule	3	154	0.659213	1	ENSG00000104918;ENSG00000118271;ENSG00000143556
GO:0008287	protein serine/threonine phosphatase complex	1	49	0.662695	1	ENSG00000119698
GO:0009925	basal plasma membrane	1	49	0.662695	1	ENSG00000178568
GO:1903293	phosphatase complex	1	49	0.662695	1	ENSG00000119698
GO:0031514	motile cilium	4	206	0.664073	1	ENSG00000111319;ENSG00000112530;ENSG00000140623;ENSG00000141316
GO:0150034	distal axon	6	307	0.667444	1	ENSG00000070729;ENSG00000110680;ENSG00000137766;ENSG00000162951;ENSG00000165694;ENSG00000185133
GO:0008021	synaptic vesicle	4	208	0.671451	1	ENSG00000116039;ENSG00000137766;ENSG00000161610;ENSG00000168481
GO:0030658	transport vesicle membrane	4	210	0.678718	1	ENSG00000104112;ENSG00000110975;ENSG00000116039;ENSG00000137766
GO:0000781	chromosome, telomeric region	3	159	0.68026	1	ENSG00000274618;ENSG00000275126;ENSG00000276410
GO:0030660	Golgi-associated vesicle membrane	2	107	0.683374	1	ENSG00000001626;ENSG00000070729
GO:0044441	ciliary part	10	510	0.683599	1	ENSG00000070729;ENSG00000111319;ENSG00000112530;ENSG00000140623;ENSG00000155066;ENSG00000166220;ENSG00000169344;ENSG00000170011;ENSG00000170289;ENSG00000173093
GO:0043204	perikaryon	3	160	0.684352	1	ENSG00000135824;ENSG00000147571;ENSG00000165553
GO:0031201	SNARE complex	1	52	0.684438	1	ENSG00000145087
GO:0099572	postsynaptic specialization	7	363	0.685784	1	ENSG00000075461;ENSG00000152208;ENSG00000152822;ENSG00000162951;ENSG00000178568;ENSG00000186297;ENSG00000205363
GO:0031312	extrinsic component of organelle membrane	1	53	0.69137	1	ENSG00000116039
GO:0005903	brush border	2	109	0.693149	1	ENSG00000105929;ENSG00000164363
GO:0030424	axon	13	661	0.69373	1	ENSG00000066032;ENSG00000070729;ENSG00000100362;ENSG00000110680;ENSG00000131094;ENSG00000137766;ENSG00000145242;ENSG00000147571;ENSG00000162951;ENSG00000165694;ENSG00000169067;ENSG00000185133;ENSG00000186417
GO:0030133	transport vesicle	8	416	0.694582	1	ENSG00000103528;ENSG00000104112;ENSG00000110975;ENSG00000116039;ENSG00000137766;ENSG00000161610;ENSG00000168481;ENSG00000170011
GO:0032154	cleavage furrow	1	54	0.69815	1	ENSG00000140623
GO:0000793	condensed chromosome	4	217	0.703266	1	ENSG00000165181;ENSG00000165556;ENSG00000171772;ENSG00000179008
GO:0098858	actin-based cell projection	4	217	0.703266	1	ENSG00000100362;ENSG00000116039;ENSG00000155066;ENSG00000167210
GO:1904724	tertiary granule lumen	1	55	0.704782	1	ENSG00000229314
GO:0030672	synaptic vesicle membrane	2	112	0.707343	1	ENSG00000116039;ENSG00000137766
GO:0099501	exocytic vesicle membrane	2	112	0.707343	1	ENSG00000116039;ENSG00000137766
GO:0030665	clathrin-coated vesicle membrane	2	114	0.716499	1	ENSG00000001626;ENSG00000084674
GO:0015030	Cajal body	1	57	0.717613	1	ENSG00000173641
GO:1904949	ATPase complex	2	115	0.720986	1	ENSG00000077080;ENSG00000143921
GO:0005884	actin filament	2	118	0.734089	1	ENSG00000148935;ENSG00000169067
GO:0044456	synapse part	19	976	0.735083	1	ENSG00000070729;ENSG00000075461;ENSG00000103546;ENSG00000105143;ENSG00000110680;ENSG00000110975;ENSG00000116039;ENSG00000131094;ENSG00000137766;ENSG00000149305;ENSG00000152208;ENSG00000152822;ENSG00000161610;ENSG00000162951;ENSG00000168481;ENSG00000173898;ENSG00000178568;ENSG00000186297;ENSG00000205363
GO:0032589	neuron projection membrane	1	61	0.741629	1	ENSG00000186297
GO:0032155	cell division site part	1	62	0.747308	1	ENSG00000140623
GO:0030659	cytoplasmic vesicle membrane	15	788	0.747801	1	ENSG00000001626;ENSG00000075461;ENSG00000084674;ENSG00000086159;ENSG00000104112;ENSG00000105929;ENSG00000110975;ENSG00000116039;ENSG00000132677;ENSG00000137766;ENSG00000141316;ENSG00000147614;ENSG00000158270;ENSG00000160472;ENSG00000183654
GO:0005783	endoplasmic reticulum	40	1995	0.748412	1	ENSG00000001626;ENSG00000084674;ENSG00000100095;ENSG00000104112;ENSG00000105428;ENSG00000109182;ENSG00000111305;ENSG00000113302;ENSG00000113889;ENSG00000125363;ENSG00000126950;ENSG00000131914;ENSG00000134398;ENSG00000139055;ENSG00000140505;ENSG00000143320;ENSG00000143556;ENSG00000145242;ENSG00000149926;ENSG00000152595;ENSG00000159224;ENSG00000161610;ENSG00000162951;ENSG00000165192;ENSG00000166391…
GO:0001917	photoreceptor inner segment	1	63	0.752862	1	ENSG00000155886
GO:0005637	nuclear inner membrane	1	63	0.752862	1	ENSG00000198780
GO:0019005	SCF ubiquitin ligase complex	1	63	0.752862	1	ENSG00000175093
GO:0030173	integral component of Golgi membrane	1	63	0.752862	1	ENSG00000135454
GO:0046658	anchored component of plasma membrane	1	63	0.752862	1	ENSG00000132677
GO:0031256	leading edge membrane	3	179	0.754775	1	ENSG00000168907;ENSG00000186297;ENSG00000197943
GO:0001726	ruffle	3	180	0.758105	1	ENSG00000168907;ENSG00000185133;ENSG00000197943
GO:0005771	multivesicular body	1	64	0.758294	1	ENSG00000168878
GO:0005923	bicellular tight junction	2	124	0.75873	1	ENSG00000095203;ENSG00000196632
GO:0016459	myosin complex	1	65	0.763607	1	ENSG00000041515
GO:0016328	lateral plasma membrane	1	67	0.773887	1	ENSG00000116039
GO:0030426	growth cone	3	185	0.77421	1	ENSG00000162951;ENSG00000165694;ENSG00000185133
GO:0005778	peroxisomal membrane	1	68	0.778858	1	ENSG00000126950
GO:0031228	intrinsic component of Golgi membrane	1	68	0.778858	1	ENSG00000135454
GO:0031903	microbody membrane	1	68	0.778858	1	ENSG00000126950
GO:0044304	main axon	1	68	0.778858	1	ENSG00000147571
GO:0055037	recycling endosome	3	187	0.780402	1	ENSG00000001626;ENSG00000100078;ENSG00000147606
GO:0012506	vesicle membrane	15	810	0.783335	1	ENSG00000001626;ENSG00000075461;ENSG00000084674;ENSG00000086159;ENSG00000104112;ENSG00000105929;ENSG00000110975;ENSG00000116039;ENSG00000132677;ENSG00000137766;ENSG00000141316;ENSG00000147614;ENSG00000158270;ENSG00000160472;ENSG00000183654
GO:0001725	stress fiber	1	70	0.788476	1	ENSG00000140623
GO:0097517	contractile actin filament bundle	1	70	0.788476	1	ENSG00000140623
GO:0070160	tight junction	2	132	0.788497	1	ENSG00000095203;ENSG00000196632
GO:0030427	site of polarized growth	3	191	0.792367	1	ENSG00000162951;ENSG00000165694;ENSG00000185133
GO:0005801	cis-Golgi network	1	71	0.793127	1	ENSG00000261649
GO:0033267	axon part	7	410	0.797598	1	ENSG00000070729;ENSG00000110680;ENSG00000137766;ENSG00000147571;ENSG00000162951;ENSG00000165694;ENSG00000185133
GO:0005844	polysome	1	72	0.797676	1	ENSG00000131914
GO:0032153	cell division site	1	72	0.797676	1	ENSG00000140623
GO:0044440	endosomal part	10	566	0.797815	1	ENSG00000001626;ENSG00000055732;ENSG00000084674;ENSG00000105929;ENSG00000113302;ENSG00000136487;ENSG00000147606;ENSG00000147614;ENSG00000168878;ENSG00000265190
GO:0005694	chromosome	35	1802	0.798565	1	ENSG00000004848;ENSG00000069011;ENSG00000077080;ENSG00000107187;ENSG00000109101;ENSG00000112246;ENSG00000113430;ENSG00000115112;ENSG00000124664;ENSG00000129152;ENSG00000131668;ENSG00000131721;ENSG00000131910;ENSG00000135373;ENSG00000136944;ENSG00000138136;ENSG00000139445;ENSG00000163623;ENSG00000165181;ENSG00000165556;ENSG00000168269;ENSG00000171772;ENSG00000173253;ENSG00000178403;ENSG00000178860…
GO:0030136	clathrin-coated vesicle	3	194	0.800981	1	ENSG00000001626;ENSG00000084674;ENSG00000168878
GO:0005929	cilium	12	674	0.806993	1	ENSG00000070729;ENSG00000111319;ENSG00000112530;ENSG00000128310;ENSG00000140623;ENSG00000141316;ENSG00000155066;ENSG00000166220;ENSG00000169344;ENSG00000170011;ENSG00000170289;ENSG00000173093
GO:0042571	immunoglobulin complex, circulating	1	75	0.810734	1	ENSG00000281179
GO:0099023	tethering complex	1	75	0.810734	1	ENSG00000170011
GO:0045335	phagocytic vesicle	2	139	0.811845	1	ENSG00000105929;ENSG00000147614
GO:0010494	cytoplasmic stress granule	1	77	0.818969	1	ENSG00000131914
GO:0016234	inclusion body	1	77	0.818969	1	ENSG00000173641
GO:0048786	presynaptic active zone	1	77	0.818969	1	ENSG00000137766
GO:0005667	transcription factor complex	6	368	0.820089	1	ENSG00000069011;ENSG00000107187;ENSG00000129152;ENSG00000138136;ENSG00000166049;ENSG00000187855
GO:0032432	actin filament bundle	1	78	0.822951	1	ENSG00000140623
GO:0005814	centriole	2	143	0.824131	1	ENSG00000100078;ENSG00000154493
GO:0042641	actomyosin	1	79	0.826846	1	ENSG00000140623
GO:0070603	SWI/SNF superfamily-type complex	1	79	0.826846	1	ENSG00000077080
GO:0043296	apical junction complex	2	146	0.832868	1	ENSG00000095203;ENSG00000196632
GO:0099568	cytoplasmic region	9	539	0.83877	1	ENSG00000004939;ENSG00000100362;ENSG00000137766;ENSG00000140623;ENSG00000170011;ENSG00000171564;ENSG00000173093;ENSG00000173898;ENSG00000263155
GO:0120025	plasma membrane bounded cell projection	43	2234	0.839511	1	ENSG00000066032;ENSG00000070729;ENSG00000100362;ENSG00000102239;ENSG00000103546;ENSG00000105642;ENSG00000105929;ENSG00000110680;ENSG00000111319;ENSG00000112530;ENSG00000113805;ENSG00000116039;ENSG00000128310;ENSG00000131094;ENSG00000135824;ENSG00000137766;ENSG00000138696;ENSG00000140623;ENSG00000141316;ENSG00000145242;ENSG00000147571;ENSG00000149305;ENSG00000152208;ENSG00000152822;ENSG00000155066…
GO:0031902	late endosome membrane	2	149	0.841213	1	ENSG00000055732;ENSG00000265190
GO:0044432	endoplasmic reticulum part	26	1417	0.853148	1	ENSG00000001626;ENSG00000084674;ENSG00000100095;ENSG00000104112;ENSG00000105428;ENSG00000111305;ENSG00000113302;ENSG00000113889;ENSG00000125363;ENSG00000134398;ENSG00000139055;ENSG00000140505;ENSG00000149926;ENSG00000152595;ENSG00000159224;ENSG00000166391;ENSG00000168785;ENSG00000168878;ENSG00000171557;ENSG00000171560;ENSG00000171714;ENSG00000178031;ENSG00000185269;ENSG00000204099;ENSG00000242366…
GO:0042581	specific granule	2	158	0.864029	1	ENSG00000104918;ENSG00000229314
GO:0005765	lysosomal membrane	6	395	0.86714	1	ENSG00000001626;ENSG00000055732;ENSG00000101210;ENSG00000105929;ENSG00000147614;ENSG00000164841
GO:0098852	lytic vacuole membrane	6	395	0.86714	1	ENSG00000001626;ENSG00000055732;ENSG00000101210;ENSG00000105929;ENSG00000147614;ENSG00000164841
GO:0014069	postsynaptic density	5	339	0.867672	1	ENSG00000075461;ENSG00000152208;ENSG00000152822;ENSG00000178568;ENSG00000205363
GO:0016591	RNA polymerase II, holoenzyme	1	92	0.870343	1	ENSG00000137878
GO:0072686	mitotic spindle	2	161	0.870941	1	ENSG00000109205;ENSG00000188175
GO:0005770	late endosome	4	285	0.873993	1	ENSG00000055732;ENSG00000113302;ENSG00000168878;ENSG00000265190
GO:0032279	asymmetric synapse	5	345	0.877209	1	ENSG00000075461;ENSG00000152208;ENSG00000152822;ENSG00000178568;ENSG00000205363
GO:0042995	cell projection	44	2337	0.879099	1	ENSG00000005108;ENSG00000066032;ENSG00000070729;ENSG00000100362;ENSG00000102239;ENSG00000103546;ENSG00000105642;ENSG00000105929;ENSG00000110680;ENSG00000111319;ENSG00000112530;ENSG00000113805;ENSG00000116039;ENSG00000128310;ENSG00000131094;ENSG00000135824;ENSG00000137766;ENSG00000138696;ENSG00000140623;ENSG00000141316;ENSG00000145242;ENSG00000147571;ENSG00000149305;ENSG00000152208;ENSG00000152822…
GO:0031901	early endosome membrane	2	167	0.883807	1	ENSG00000001626;ENSG00000055732
GO:0000922	spindle pole	2	168	0.885833	1	ENSG00000169344;ENSG00000185988
GO:0098589	membrane region	5	352	0.887591	1	ENSG00000103546;ENSG00000155066;ENSG00000160472;ENSG00000187889;ENSG00000241186
GO:0031461	cullin-RING ubiquitin ligase complex	2	169	0.887825	1	ENSG00000146021;ENSG00000175093
GO:0044454	nuclear chromosome part	3	238	0.896356	1	ENSG00000077080;ENSG00000171772;ENSG00000179008
GO:0098794	postsynapse	10	641	0.899217	1	ENSG00000075461;ENSG00000149305;ENSG00000152208;ENSG00000152822;ENSG00000161610;ENSG00000162951;ENSG00000173898;ENSG00000178568;ENSG00000186297;ENSG00000205363
GO:0030662	coated vesicle membrane	2	177	0.902645	1	ENSG00000001626;ENSG00000084674
GO:0090575	RNA polymerase II transcription factor complex	2	177	0.902645	1	ENSG00000166049;ENSG00000187855
GO:0000790	nuclear chromatin	1	105	0.902933	1	ENSG00000077080
GO:0005798	Golgi-associated vesicle	2	178	0.904364	1	ENSG00000001626;ENSG00000070729
GO:0034451	centriolar satellite	1	107	0.907163	1	ENSG00000168297
GO:0042470	melanosome	1	109	0.911209	1	ENSG00000170011
GO:0048770	pigment granule	1	109	0.911209	1	ENSG00000170011
GO:0098984	neuron to neuron synapse	5	371	0.912057	1	ENSG00000075461;ENSG00000152208;ENSG00000152822;ENSG00000178568;ENSG00000205363
GO:0044438	microbody part	1	110	0.913166	1	ENSG00000126950
GO:0044439	peroxisomal part	1	110	0.913166	1	ENSG00000126950
GO:0055029	nuclear DNA-directed RNA polymerase complex	1	117	0.925709	1	ENSG00000137878
GO:0044450	microtubule organizing center part	3	260	0.926593	1	ENSG00000100078;ENSG00000154493;ENSG00000168297
GO:0044798	nuclear transcription factor complex	2	193	0.926966	1	ENSG00000166049;ENSG00000187855
GO:0000428	DNA-directed RNA polymerase complex	1	118	0.927346	1	ENSG00000137878
GO:0005769	early endosome	5	387	0.928911	1	ENSG00000001626;ENSG00000043591;ENSG00000055732;ENSG00000084674;ENSG00000147614
GO:0005819	spindle	5	390	0.931731	1	ENSG00000109205;ENSG00000140623;ENSG00000169344;ENSG00000185988;ENSG00000188175
GO:0030496	midbody	2	197	0.932083	1	ENSG00000140623;ENSG00000188175
GO:0061695	transferase complex, transferring phosphorus-containing groups	3	266	0.933308	1	ENSG00000137878;ENSG00000139144;ENSG00000196289
GO:0030880	RNA polymerase complex	1	122	0.933545	1	ENSG00000137878
GO:1904813	ficolin-1-rich granule lumen	1	124	0.936444	1	ENSG00000178372
GO:0010008	endosome membrane	7	520	0.940675	1	ENSG00000001626;ENSG00000055732;ENSG00000084674;ENSG00000105929;ENSG00000147606;ENSG00000147614;ENSG00000265190
GO:0012505	endomembrane system	89	4651	0.940957	1	ENSG00000001626;ENSG00000043591;ENSG00000055732;ENSG00000084674;ENSG00000100078;ENSG00000100095;ENSG00000101638;ENSG00000103528;ENSG00000104112;ENSG00000104918;ENSG00000105143;ENSG00000105428;ENSG00000105929;ENSG00000109182;ENSG00000110975;ENSG00000111305;ENSG00000111319;ENSG00000113302;ENSG00000113889;ENSG00000116039;ENSG00000118271;ENSG00000125363;ENSG00000126950;ENSG00000131914;ENSG00000134398…
GO:0045121	membrane raft	4	339	0.94151	1	ENSG00000103546;ENSG00000155066;ENSG00000187889;ENSG00000241186
GO:0098857	membrane microdomain	4	339	0.94151	1	ENSG00000103546;ENSG00000155066;ENSG00000187889;ENSG00000241186
GO:0005930	axoneme	1	131	0.945631	1	ENSG00000173093
GO:0044463	cell projection part	26	1562	0.946958	1	ENSG00000070729;ENSG00000105929;ENSG00000110680;ENSG00000111319;ENSG00000112530;ENSG00000135824;ENSG00000137766;ENSG00000138696;ENSG00000140623;ENSG00000145242;ENSG00000147571;ENSG00000152208;ENSG00000152822;ENSG00000155066;ENSG00000162951;ENSG00000164363;ENSG00000165694;ENSG00000166220;ENSG00000168907;ENSG00000169344;ENSG00000170011;ENSG00000170289;ENSG00000173093;ENSG00000185133;ENSG00000186297…
GO:0120038	plasma membrane bounded cell projection part	26	1562	0.946958	1	ENSG00000070729;ENSG00000105929;ENSG00000110680;ENSG00000111319;ENSG00000112530;ENSG00000135824;ENSG00000137766;ENSG00000138696;ENSG00000140623;ENSG00000145242;ENSG00000147571;ENSG00000152208;ENSG00000152822;ENSG00000155066;ENSG00000162951;ENSG00000164363;ENSG00000165694;ENSG00000166220;ENSG00000168907;ENSG00000169344;ENSG00000170011;ENSG00000170289;ENSG00000173093;ENSG00000185133;ENSG00000186297…
GO:0097014	ciliary plasm	1	133	0.948003	1	ENSG00000173093
GO:0005768	endosome	15	993	0.953438	1	ENSG00000001626;ENSG00000043591;ENSG00000055732;ENSG00000084674;ENSG00000100078;ENSG00000105929;ENSG00000113302;ENSG00000136487;ENSG00000138039;ENSG00000147606;ENSG00000147614;ENSG00000166148;ENSG00000168878;ENSG00000215644;ENSG00000265190
GO:0001650	fibrillar center	1	140	0.955523	1	ENSG00000157404
GO:0030135	coated vesicle	3	296	0.959158	1	ENSG00000001626;ENSG00000084674;ENSG00000168878
GO:0005777	peroxisome	1	146	0.961099	1	ENSG00000126950
GO:0042579	microbody	1	146	0.961099	1	ENSG00000126950
GO:0043232	intracellular non-membrane-bounded organelle	96	5089	0.96531	1	ENSG00000004848;ENSG00000004939;ENSG00000041515;ENSG00000066032;ENSG00000069011;ENSG00000077080;ENSG00000084674;ENSG00000091482;ENSG00000095203;ENSG00000100078;ENSG00000100341;ENSG00000100362;ENSG00000105141;ENSG00000105143;ENSG00000107187;ENSG00000109101;ENSG00000109205;ENSG00000112246;ENSG00000112530;ENSG00000113430;ENSG00000115112;ENSG00000117148;ENSG00000124664;ENSG00000129152;ENSG00000129991…
GO:0030667	secretory granule membrane	3	308	0.966586	1	ENSG00000104112;ENSG00000141316;ENSG00000160472
GO:0043228	non-membrane-bounded organelle	96	5097	0.966771	1	ENSG00000004848;ENSG00000004939;ENSG00000041515;ENSG00000066032;ENSG00000069011;ENSG00000077080;ENSG00000084674;ENSG00000091482;ENSG00000095203;ENSG00000100078;ENSG00000100341;ENSG00000100362;ENSG00000105141;ENSG00000105143;ENSG00000107187;ENSG00000109101;ENSG00000109205;ENSG00000112246;ENSG00000112530;ENSG00000113430;ENSG00000115112;ENSG00000117148;ENSG00000124664;ENSG00000129152;ENSG00000129991…
GO:0036464	cytoplasmic ribonucleoprotein granule	2	238	0.96824	1	ENSG00000131914;ENSG00000188425
GO:0036064	ciliary basal body	1	162	0.972788	1	ENSG00000166220
GO:0070820	tertiary granule	1	163	0.97339	1	ENSG00000229314
GO:0005875	microtubule associated complex	1	164	0.973978	1	ENSG00000117148
GO:0019814	immunoglobulin complex	1	165	0.974553	1	ENSG00000281179
GO:0030054	cell junction	21	1388	0.975486	1	ENSG00000066032;ENSG00000073150;ENSG00000091482;ENSG00000095203;ENSG00000134757;ENSG00000137766;ENSG00000143556;ENSG00000152208;ENSG00000154162;ENSG00000157404;ENSG00000159248;ENSG00000161610;ENSG00000162706;ENSG00000162951;ENSG00000164411;ENSG00000168481;ENSG00000186297;ENSG00000188910;ENSG00000196632;ENSG00000205363;ENSG00000263155
GO:0035770	ribonucleoprotein granule	2	252	0.975638	1	ENSG00000131914;ENSG00000188425
GO:0048471	perinuclear region of cytoplasm	9	739	0.982837	1	ENSG00000041515;ENSG00000140623;ENSG00000145242;ENSG00000146411;ENSG00000161610;ENSG00000163209;ENSG00000166391;ENSG00000170011;ENSG00000188425
GO:0044452	nucleolar part	1	183	0.982985	1	ENSG00000157404
GO:0101002	ficolin-1-rich granule	1	184	0.983361	1	ENSG00000178372
GO:0043197	dendritic spine	1	186	0.984089	1	ENSG00000152208
GO:0019866	organelle inner membrane	6	559	0.984591	1	ENSG00000131730;ENSG00000140459;ENSG00000198780;ENSG00000204099;ENSG00000223572;ENSG00000237289
GO:0031252	cell leading edge	4	426	0.984897	1	ENSG00000168907;ENSG00000185133;ENSG00000186297;ENSG00000197943
GO:0044309	neuron spine	1	189	0.985123	1	ENSG00000152208
GO:0098687	chromosomal region	3	356	0.985365	1	ENSG00000274618;ENSG00000275126;ENSG00000276410
GO:0005743	mitochondrial inner membrane	5	497	0.985489	1	ENSG00000131730;ENSG00000140459;ENSG00000204099;ENSG00000223572;ENSG00000237289
GO:0070161	anchoring junction	6	572	0.98725	1	ENSG00000066032;ENSG00000091482;ENSG00000134757;ENSG00000143556;ENSG00000154162;ENSG00000196632
GO:0030425	dendrite	7	641	0.98799	1	ENSG00000135824;ENSG00000138696;ENSG00000145242;ENSG00000152208;ENSG00000152822;ENSG00000185133;ENSG00000186297
GO:0097447	dendritic tree	7	643	0.988323	1	ENSG00000135824;ENSG00000138696;ENSG00000145242;ENSG00000152208;ENSG00000152822;ENSG00000185133;ENSG00000186297
GO:0005741	mitochondrial outer membrane	1	205	0.989602	1	ENSG00000204099
GO:0000151	ubiquitin ligase complex	2	299	0.990166	1	ENSG00000146021;ENSG00000175093
GO:0031965	nuclear membrane	2	301	0.990544	1	ENSG00000171722;ENSG00000198780
GO:0098805	whole membrane	26	1765	0.990825	1	ENSG00000001626;ENSG00000055732;ENSG00000070729;ENSG00000075461;ENSG00000084674;ENSG00000101210;ENSG00000103546;ENSG00000104112;ENSG00000105929;ENSG00000110975;ENSG00000116039;ENSG00000126950;ENSG00000137766;ENSG00000141316;ENSG00000147606;ENSG00000147614;ENSG00000151418;ENSG00000155066;ENSG00000158270;ENSG00000160472;ENSG00000164841;ENSG00000180251;ENSG00000187889;ENSG00000204099;ENSG00000241186…
GO:0032838	plasma membrane bounded cell projection cytoplasm	1	225	0.993358	1	ENSG00000173093
GO:0031968	organelle outer membrane	1	230	0.994063	1	ENSG00000204099
GO:0005912	adherens junction	5	556	0.994254	1	ENSG00000066032;ENSG00000091482;ENSG00000143556;ENSG00000154162;ENSG00000196632
GO:0019867	outer membrane	1	232	0.994323	1	ENSG00000204099
GO:0005789	endoplasmic reticulum membrane	14	1132	0.994491	1	ENSG00000001626;ENSG00000084674;ENSG00000100095;ENSG00000105428;ENSG00000111305;ENSG00000134398;ENSG00000140505;ENSG00000149926;ENSG00000166391;ENSG00000168878;ENSG00000171714;ENSG00000204099;ENSG00000242366;ENSG00000242515
GO:0098827	endoplasmic reticulum subcompartment	14	1137	0.994814	1	ENSG00000001626;ENSG00000084674;ENSG00000100095;ENSG00000105428;ENSG00000111305;ENSG00000134398;ENSG00000140505;ENSG00000149926;ENSG00000166391;ENSG00000168878;ENSG00000171714;ENSG00000204099;ENSG00000242366;ENSG00000242515
GO:0031301	integral component of organelle membrane	1	239	0.995148	1	ENSG00000135454
GO:0044445	cytosolic part	1	244	0.995663	1	ENSG00000223609
GO:0042175	nuclear outer membrane-endoplasmic reticulum membrane network	14	1154	0.995784	1	ENSG00000001626;ENSG00000084674;ENSG00000100095;ENSG00000105428;ENSG00000111305;ENSG00000134398;ENSG00000140505;ENSG00000149926;ENSG00000166391;ENSG00000168878;ENSG00000171714;ENSG00000204099;ENSG00000242366;ENSG00000242515
GO:0005874	microtubule	3	435	0.996473	1	ENSG00000148935;ENSG00000152086;ENSG00000158022
GO:0031300	intrinsic component of organelle membrane	1	261	0.99704	1	ENSG00000135454
GO:0044444	cytoplasmic part	194	10093	0.997211	1	ENSG00000001626;ENSG00000004939;ENSG00000035720;ENSG00000041515;ENSG00000043591;ENSG00000046774;ENSG00000055732;ENSG00000066032;ENSG00000070729;ENSG00000075461;ENSG00000077009;ENSG00000084674;ENSG00000086159;ENSG00000091482;ENSG00000095203;ENSG00000100078;ENSG00000100095;ENSG00000100341;ENSG00000100362;ENSG00000101210;ENSG00000101349;ENSG00000101638;ENSG00000103528;ENSG00000104112;ENSG00000104918…
GO:0098588	bounding membrane of organelle	31	2178	0.997634	1	ENSG00000001626;ENSG00000055732;ENSG00000070729;ENSG00000075461;ENSG00000084674;ENSG00000101210;ENSG00000101638;ENSG00000104112;ENSG00000105929;ENSG00000110975;ENSG00000111319;ENSG00000116039;ENSG00000126950;ENSG00000135454;ENSG00000137766;ENSG00000141316;ENSG00000147606;ENSG00000147614;ENSG00000149926;ENSG00000151418;ENSG00000155066;ENSG00000158270;ENSG00000160472;ENSG00000164841;ENSG00000169344…
GO:0005813	centrosome	5	620	0.997991	1	ENSG00000154493;ENSG00000163207;ENSG00000168297;ENSG00000185988;ENSG00000188175
GO:0015630	microtubule cytoskeleton	15	1314	0.998791	1	ENSG00000100078;ENSG00000109205;ENSG00000112530;ENSG00000117148;ENSG00000140623;ENSG00000148935;ENSG00000152086;ENSG00000154493;ENSG00000158022;ENSG00000163207;ENSG00000166220;ENSG00000168297;ENSG00000169344;ENSG00000185988;ENSG00000188175
GO:1990234	transferase complex	7	795	0.998801	1	ENSG00000077080;ENSG00000137878;ENSG00000139144;ENSG00000146021;ENSG00000169067;ENSG00000175093;ENSG00000196289
GO:0000139	Golgi membrane	6	725	0.998821	1	ENSG00000101638;ENSG00000135454;ENSG00000149926;ENSG00000177511;ENSG00000185274;ENSG00000188175
GO:0016607	nuclear speck	2	413	0.998996	1	ENSG00000166049;ENSG00000197641
GO:0005815	microtubule organizing center	7	816	0.999141	1	ENSG00000100078;ENSG00000154493;ENSG00000163207;ENSG00000166220;ENSG00000168297;ENSG00000185988;ENSG00000188175
GO:0005924	cell-substrate adherens junction	2	422	0.999165	1	ENSG00000091482;ENSG00000143556
GO:0030055	cell-substrate junction	2	427	0.999246	1	ENSG00000091482;ENSG00000143556
GO:0044431	Golgi apparatus part	9	968	0.999305	1	ENSG00000101638;ENSG00000135454;ENSG00000149926;ENSG00000169344;ENSG00000172551;ENSG00000177511;ENSG00000185274;ENSG00000188175;ENSG00000261649
GO:0005635	nuclear envelope	2	471	0.999696	1	ENSG00000171722;ENSG00000198780
GO:0005737	cytoplasm	229	11950	0.999707	1	ENSG00000001626;ENSG00000004939;ENSG00000035720;ENSG00000041515;ENSG00000043591;ENSG00000046774;ENSG00000055732;ENSG00000066032;ENSG00000069011;ENSG00000070729;ENSG00000073150;ENSG00000075461;ENSG00000077009;ENSG00000079393;ENSG00000080511;ENSG00000084674;ENSG00000086159;ENSG00000091482;ENSG00000095203;ENSG00000100078;ENSG00000100095;ENSG00000100341;ENSG00000100362;ENSG00000101210;ENSG00000101349…
GO:0005759	mitochondrial matrix	2	482	0.999758	1	ENSG00000140459;ENSG00000178568
GO:0031966	mitochondrial membrane	5	750	0.999789	1	ENSG00000131730;ENSG00000140459;ENSG00000204099;ENSG00000223572;ENSG00000237289
GO:0098791	Golgi subcompartment	6	845	0.999845	1	ENSG00000101638;ENSG00000135454;ENSG00000149926;ENSG00000177511;ENSG00000185274;ENSG00000188175
GO:0005623	cell	352	17043	0.99989	1	ENSG00000001626;ENSG00000004848;ENSG00000004939;ENSG00000005108;ENSG00000007216;ENSG00000035720;ENSG00000041515;ENSG00000043591;ENSG00000046774;ENSG00000055732;ENSG00000066032;ENSG00000069011;ENSG00000069206;ENSG00000070729;ENSG00000072041;ENSG00000073150;ENSG00000075461;ENSG00000077009;ENSG00000077080;ENSG00000079393;ENSG00000080511;ENSG00000084674;ENSG00000086159;ENSG00000087128;ENSG00000091482…
GO:0044464	cell part	352	17043	0.99989	1	ENSG00000001626;ENSG00000004848;ENSG00000004939;ENSG00000005108;ENSG00000007216;ENSG00000035720;ENSG00000041515;ENSG00000043591;ENSG00000046774;ENSG00000055732;ENSG00000066032;ENSG00000069011;ENSG00000069206;ENSG00000070729;ENSG00000072041;ENSG00000073150;ENSG00000075461;ENSG00000077009;ENSG00000077080;ENSG00000079393;ENSG00000080511;ENSG00000084674;ENSG00000086159;ENSG00000087128;ENSG00000091482…
GO:0005829	cytosol	85	5361	0.999913	1	ENSG00000001626;ENSG00000041515;ENSG00000046774;ENSG00000066032;ENSG00000077009;ENSG00000084674;ENSG00000095203;ENSG00000100341;ENSG00000105141;ENSG00000109205;ENSG00000112530;ENSG00000113302;ENSG00000116039;ENSG00000119698;ENSG00000124102;ENSG00000129991;ENSG00000131737;ENSG00000131914;ENSG00000133742;ENSG00000134757;ENSG00000135480;ENSG00000139144;ENSG00000141750;ENSG00000143320;ENSG00000143556…
GO:0005740	mitochondrial envelope	5	800	0.999915	1	ENSG00000131730;ENSG00000140459;ENSG00000204099;ENSG00000223572;ENSG00000237289
GO:0031984	organelle subcompartment	19	1764	0.999917	1	ENSG00000001626;ENSG00000084674;ENSG00000100095;ENSG00000101638;ENSG00000105428;ENSG00000111305;ENSG00000134398;ENSG00000135454;ENSG00000140505;ENSG00000149926;ENSG00000166391;ENSG00000168878;ENSG00000171714;ENSG00000177511;ENSG00000185274;ENSG00000188175;ENSG00000204099;ENSG00000242366;ENSG00000242515
GO:0005925	focal adhesion	1	420	0.999918	1	ENSG00000143556
GO:0016604	nuclear body	5	816	0.999936	1	ENSG00000104413;ENSG00000163207;ENSG00000166049;ENSG00000173641;ENSG00000197641
GO:0031090	organelle membrane	40	3017	0.999937	1	ENSG00000001626;ENSG00000055732;ENSG00000070729;ENSG00000075461;ENSG00000084674;ENSG00000086159;ENSG00000101210;ENSG00000101638;ENSG00000104112;ENSG00000105929;ENSG00000110975;ENSG00000111319;ENSG00000116039;ENSG00000126950;ENSG00000131730;ENSG00000132677;ENSG00000135454;ENSG00000137766;ENSG00000140459;ENSG00000141316;ENSG00000147606;ENSG00000147614;ENSG00000149926;ENSG00000151418;ENSG00000155066…
GO:0005794	Golgi apparatus	15	1593	0.999975	1	ENSG00000101638;ENSG00000105143;ENSG00000125363;ENSG00000135373;ENSG00000135454;ENSG00000149926;ENSG00000163209;ENSG00000167757;ENSG00000169344;ENSG00000172551;ENSG00000177511;ENSG00000182107;ENSG00000185274;ENSG00000188175;ENSG00000261649
GO:0032991	protein-containing complex	88	5650	0.999977	1	ENSG00000001626;ENSG00000035720;ENSG00000041515;ENSG00000066032;ENSG00000069011;ENSG00000070729;ENSG00000075461;ENSG00000077080;ENSG00000084674;ENSG00000099822;ENSG00000100362;ENSG00000101210;ENSG00000104413;ENSG00000105143;ENSG00000105642;ENSG00000105929;ENSG00000107105;ENSG00000107187;ENSG00000109684;ENSG00000111319;ENSG00000113302;ENSG00000116039;ENSG00000117148;ENSG00000119698;ENSG00000125861…
GO:0044451	nucleoplasm part	8	1181	0.999994	1	ENSG00000077080;ENSG00000104413;ENSG00000137878;ENSG00000163207;ENSG00000166049;ENSG00000169067;ENSG00000173641;ENSG00000197641
GO:0044422	organelle part	184	10381	0.999995	1	ENSG00000001626;ENSG00000004848;ENSG00000004939;ENSG00000035720;ENSG00000041515;ENSG00000046774;ENSG00000055732;ENSG00000069011;ENSG00000070729;ENSG00000075461;ENSG00000077009;ENSG00000077080;ENSG00000084674;ENSG00000086159;ENSG00000091482;ENSG00000100078;ENSG00000100095;ENSG00000100362;ENSG00000101210;ENSG00000101349;ENSG00000101638;ENSG00000104112;ENSG00000104413;ENSG00000104918;ENSG00000105141…
GO:0005730	nucleolus	5	955	0.999995	1	ENSG00000131914;ENSG00000157404;ENSG00000168269;ENSG00000175175;ENSG00000185988
GO:1990904	ribonucleoprotein complex	4	909	0.999998	1	ENSG00000104413;ENSG00000107105;ENSG00000131914;ENSG00000188425
GO:0044429	mitochondrial part	6	1108	0.999999	1	ENSG00000131730;ENSG00000140459;ENSG00000178568;ENSG00000204099;ENSG00000223572;ENSG00000237289
GO:0044446	intracellular organelle part	173	10077	0.999999	1	ENSG00000001626;ENSG00000004848;ENSG00000035720;ENSG00000041515;ENSG00000046774;ENSG00000055732;ENSG00000069011;ENSG00000070729;ENSG00000075461;ENSG00000077009;ENSG00000077080;ENSG00000084674;ENSG00000086159;ENSG00000100078;ENSG00000100095;ENSG00000100362;ENSG00000101210;ENSG00000101349;ENSG00000101638;ENSG00000104112;ENSG00000104413;ENSG00000104918;ENSG00000105141;ENSG00000105428;ENSG00000105929…
GO:0031967	organelle envelope	7	1244	1	1	ENSG00000131730;ENSG00000140459;ENSG00000171722;ENSG00000198780;ENSG00000204099;ENSG00000223572;ENSG00000237289
GO:0031975	envelope	7	1244	1	1	ENSG00000131730;ENSG00000140459;ENSG00000171722;ENSG00000198780;ENSG00000204099;ENSG00000223572;ENSG00000237289
GO:1902494	catalytic complex	9	1434	1	1	ENSG00000077080;ENSG00000119698;ENSG00000137878;ENSG00000139144;ENSG00000143921;ENSG00000146021;ENSG00000169067;ENSG00000175093;ENSG00000196289
GO:0005739	mitochondrion	12	1673	1	1	ENSG00000035720;ENSG00000101349;ENSG00000105141;ENSG00000131730;ENSG00000140459;ENSG00000165553;ENSG00000168907;ENSG00000175175;ENSG00000178568;ENSG00000204099;ENSG00000223572;ENSG00000237289
GO:0031974	membrane-enclosed lumen	76	5615	1	1	ENSG00000035720;ENSG00000041515;ENSG00000046774;ENSG00000077009;ENSG00000077080;ENSG00000084674;ENSG00000101349;ENSG00000104112;ENSG00000104413;ENSG00000104918;ENSG00000105141;ENSG00000107105;ENSG00000109205;ENSG00000111701;ENSG00000113302;ENSG00000113889;ENSG00000118271;ENSG00000118596;ENSG00000125363;ENSG00000129152;ENSG00000131910;ENSG00000131914;ENSG00000135373;ENSG00000136487;ENSG00000136929…
GO:0043233	organelle lumen	76	5615	1	1	ENSG00000035720;ENSG00000041515;ENSG00000046774;ENSG00000077009;ENSG00000077080;ENSG00000084674;ENSG00000101349;ENSG00000104112;ENSG00000104413;ENSG00000104918;ENSG00000105141;ENSG00000107105;ENSG00000109205;ENSG00000111701;ENSG00000113302;ENSG00000113889;ENSG00000118271;ENSG00000118596;ENSG00000125363;ENSG00000129152;ENSG00000131910;ENSG00000131914;ENSG00000135373;ENSG00000136487;ENSG00000136929…
GO:0070013	intracellular organelle lumen	76	5615	1	1	ENSG00000035720;ENSG00000041515;ENSG00000046774;ENSG00000077009;ENSG00000077080;ENSG00000084674;ENSG00000101349;ENSG00000104112;ENSG00000104413;ENSG00000104918;ENSG00000105141;ENSG00000107105;ENSG00000109205;ENSG00000111701;ENSG00000113302;ENSG00000113889;ENSG00000118271;ENSG00000118596;ENSG00000125363;ENSG00000129152;ENSG00000131910;ENSG00000131914;ENSG00000135373;ENSG00000136487;ENSG00000136929…
GO:0044424	intracellular part	278	14816	1	1	ENSG00000001626;ENSG00000004848;ENSG00000004939;ENSG00000035720;ENSG00000041515;ENSG00000043591;ENSG00000046774;ENSG00000055732;ENSG00000066032;ENSG00000069011;ENSG00000070729;ENSG00000073150;ENSG00000075461;ENSG00000077009;ENSG00000077080;ENSG00000079393;ENSG00000080511;ENSG00000084674;ENSG00000086159;ENSG00000091482;ENSG00000095203;ENSG00000100078;ENSG00000100095;ENSG00000100341;ENSG00000100362…
GO:0005622	intracellular	278	14817	1	1	ENSG00000001626;ENSG00000004848;ENSG00000004939;ENSG00000035720;ENSG00000041515;ENSG00000043591;ENSG00000046774;ENSG00000055732;ENSG00000066032;ENSG00000069011;ENSG00000070729;ENSG00000073150;ENSG00000075461;ENSG00000077009;ENSG00000077080;ENSG00000079393;ENSG00000080511;ENSG00000084674;ENSG00000086159;ENSG00000091482;ENSG00000095203;ENSG00000100078;ENSG00000100095;ENSG00000100341;ENSG00000100362…
GO:0043227	membrane-bounded organelle	227	12764	1	1	ENSG00000001626;ENSG00000004848;ENSG00000004939;ENSG00000007216;ENSG00000035720;ENSG00000041515;ENSG00000043591;ENSG00000044012;ENSG00000046774;ENSG00000055732;ENSG00000066032;ENSG00000069011;ENSG00000070729;ENSG00000075461;ENSG00000077009;ENSG00000077080;ENSG00000084674;ENSG00000086159;ENSG00000091482;ENSG00000095713;ENSG00000100078;ENSG00000100095;ENSG00000100362;ENSG00000101210;ENSG00000101349…
GO:0043229	intracellular organelle	234	13100	1	1	ENSG00000001626;ENSG00000004848;ENSG00000004939;ENSG00000035720;ENSG00000041515;ENSG00000043591;ENSG00000046774;ENSG00000055732;ENSG00000066032;ENSG00000069011;ENSG00000070729;ENSG00000075461;ENSG00000077009;ENSG00000077080;ENSG00000084674;ENSG00000086159;ENSG00000091482;ENSG00000095203;ENSG00000100078;ENSG00000100095;ENSG00000100341;ENSG00000100362;ENSG00000101210;ENSG00000101349;ENSG00000101638…
GO:0043226	organelle	251	13892	1	1	ENSG00000001626;ENSG00000004848;ENSG00000004939;ENSG00000007216;ENSG00000035720;ENSG00000041515;ENSG00000043591;ENSG00000044012;ENSG00000046774;ENSG00000055732;ENSG00000066032;ENSG00000069011;ENSG00000070729;ENSG00000075461;ENSG00000077009;ENSG00000077080;ENSG00000084674;ENSG00000086159;ENSG00000091482;ENSG00000095203;ENSG00000095713;ENSG00000100078;ENSG00000100095;ENSG00000100341;ENSG00000100362…
GO:0005634	nucleus	109	7597	1	1	ENSG00000001626;ENSG00000004848;ENSG00000035720;ENSG00000041515;ENSG00000046774;ENSG00000066032;ENSG00000069011;ENSG00000077009;ENSG00000077080;ENSG00000091482;ENSG00000100362;ENSG00000101349;ENSG00000104413;ENSG00000104918;ENSG00000105141;ENSG00000107105;ENSG00000107187;ENSG00000109101;ENSG00000109205;ENSG00000110680;ENSG00000111701;ENSG00000112246;ENSG00000112530;ENSG00000113430;ENSG00000115112…
GO:0005654	nucleoplasm	44	4134	1	1	ENSG00000035720;ENSG00000041515;ENSG00000046774;ENSG00000077009;ENSG00000077080;ENSG00000101349;ENSG00000104413;ENSG00000105141;ENSG00000107105;ENSG00000109205;ENSG00000111701;ENSG00000118596;ENSG00000129152;ENSG00000131910;ENSG00000135373;ENSG00000136929;ENSG00000137878;ENSG00000143320;ENSG00000151365;ENSG00000154493;ENSG00000159182;ENSG00000163207;ENSG00000165556;ENSG00000165694;ENSG00000166049…
GO:0031981	nuclear lumen	50	4489	1	1	ENSG00000035720;ENSG00000041515;ENSG00000046774;ENSG00000077009;ENSG00000077080;ENSG00000101349;ENSG00000104413;ENSG00000105141;ENSG00000107105;ENSG00000109205;ENSG00000111701;ENSG00000118596;ENSG00000129152;ENSG00000131910;ENSG00000131914;ENSG00000135373;ENSG00000136929;ENSG00000137878;ENSG00000143320;ENSG00000151365;ENSG00000154493;ENSG00000157404;ENSG00000159182;ENSG00000163207;ENSG00000165181…
GO:0044428	nuclear part	53	4867	1	1	ENSG00000035720;ENSG00000041515;ENSG00000046774;ENSG00000077009;ENSG00000077080;ENSG00000101349;ENSG00000104413;ENSG00000105141;ENSG00000107105;ENSG00000109205;ENSG00000111701;ENSG00000118596;ENSG00000129152;ENSG00000131910;ENSG00000131914;ENSG00000135373;ENSG00000136929;ENSG00000137878;ENSG00000143320;ENSG00000151365;ENSG00000154493;ENSG00000157404;ENSG00000159182;ENSG00000163207;ENSG00000165181…
GO:0043231	intracellular membrane-bounded organelle	175	11307	1	1	ENSG00000001626;ENSG00000004848;ENSG00000035720;ENSG00000041515;ENSG00000046774;ENSG00000055732;ENSG00000066032;ENSG00000069011;ENSG00000077009;ENSG00000077080;ENSG00000084674;ENSG00000091482;ENSG00000100095;ENSG00000100362;ENSG00000101210;ENSG00000101349;ENSG00000101638;ENSG00000104112;ENSG00000104413;ENSG00000104918;ENSG00000105141;ENSG00000105143;ENSG00000105428;ENSG00000105929;ENSG00000107105…
GO:0005575	cellular_component	407	18579	1	1	ENSG00000001626;ENSG00000004848;ENSG00000004939;ENSG00000005108;ENSG00000007216;ENSG00000035720;ENSG00000041515;ENSG00000043591;ENSG00000044012;ENSG00000046774;ENSG00000055732;ENSG00000066032;ENSG00000069011;ENSG00000069206;ENSG00000070729;ENSG00000072041;ENSG00000073150;ENSG00000075461;ENSG00000077009;ENSG00000077080;ENSG00000079393;ENSG00000080511;ENSG00000084674;ENSG00000086159;ENSG00000087128…
